# Supplementary material for: Systematics of Lobelioideae (Campanulaceae): review, phylogenetic and biogeographic analyses
Source: PhytoKeys. 2021 Mar 5;174:13–45. doi: 10.3897/phytokeys.174.59555 (PMC7954781; doi:10.3897/phytokeys.174.59555)
Supplement: Supplementary material 1 — Lobelioideae data matrix [file phytokeys-174-013-s001.xlsx]

## Sheet: Sheet 1
Linked data table for sequences and voucher information used in the study.
Taxon name/MOTU	Associated sequences		Taxon name/MOTU	Associated sequences		Taxon name/MOTU	Associated sequences		Taxon name/MOTU	Associated sequences		Taxon name/MOTU	Associated sequences		Taxon name/MOTU	Associated sequences		Taxon name/MOTU	Associated sequences		Taxon name/MOTU	Associated sequences		Taxon name/MOTU	Associated sequences		Taxon name/MOTU	Associated sequences		Taxon name/MOTU	Associated sequences		Taxon name/MOTU	Associated sequences		Taxon name/MOTU	Associated sequences		Taxon name/MOTU	Associated sequences		Taxon name/MOTU	Associated sequences		Taxon name/MOTU	Associated sequences		Taxon name/MOTU	Associated sequences
	GenBank ID atpB	Voucher atpB		GenBank ID atpB-rbcL	Voucher atpB-rbcL		GenBank ID atpF-atpH	Voucher atpF-atpH		GenBank ID atpF	Voucher atpF		GenBank ID atpH	Voucher atpH		GenBank ID ITS	Voucher ITS		GenBank ID matK	Voucher matK		GenBank ID ndhF	Voucher ndhF		GenBank ID petD	Voucher petD		GenBank ID psbA-trnH	Voucher psbA-trnH		GenBank ID rbcL	Voucher rbcL		GenBank ID rpl16	Voucher rpl16		GenBank ID rpl32-ndhF	Voucher rpl32-ndhF		GenBank ID rpoc1	Voucher rpoc1		GenBank ID trnK-matK	Voucher trnK-matK		GenBank ID trnL-trnF	Voucher trnL-trnF		GenBank ID trnV-trnK
Abrophyllum ornans	AJ318962.1		Adenophora capillaris	MK556065.1	BOP205381	Adenophora coronopifolia	HQ704479.1	Yoo18845	Apetahia longistigmata	MF061165.1		Adenophora divaricata	NC_036221.1		Adenophora aurita	KU983907.1	S13-3357	Abrophyllum ornans	KM894583.1	129307899	Abrophyllum ornans	AJ238333.1		Adenophora aurita	KU983947.1	S13-3357	Adenophora divaricata	NC_036221.1		Adenophora ornans	X87375.1		Adenophora coronopifolia	HQ704556.1	Yoo18845	Apetahia longistigmata	MF061165.1		Adenophora coronopifolia	HQ704596.1	Yoo18845	Adenophora divaricata	NC_036221.1		Abrophyllum ornans	GQ984068.1		Adenophora divaricata	NC_036221.1
Adenophora aurita	KU983877.1	S13-3357	Adenophora coronopifolia	HQ704439.1	Yoo18845	Adenophora divaricata	NC_036221.1		Burmeistera auriculata	KY045495.1	Muchhala 120	Adenophora remotiflora	NC_026999.1		Adenophora capillaris	KF175324.1	LiJP0199	Adenophora capillaris	KT970184.1		Adenophora divaricata	NC_036221.1		Adenophora capillaris	KT970332.1		Adenophora erecta	NC_036222.1		Adenophora aurita	KU984025.1	S13-3357	Adenophora divaricata	HQ704585.1	Yoo75375	Burmeistera aff. bullatifolia	KP014862.1	LPL-2014 isolate LL206	Adenophora divaricata	NC_036221.1		Adenophora erecta	NC_036222.1		Adenophora aurita	KU984059.1	S13-3357	Adenophora erecta	NC_036222.1
Adenophora capillaris	KT970112.1		Adenophora delavayi	MK556051.1	BOP205069	Adenophora erecta	NC_036222.1		Burmeistera borjensis	KY045494.1	Muchhala 154	Adenophora stricta	NC_036223.1		Adenophora capillaris subsp. leptosepala	KU983909.1	MBK:0241347	Adenophora coelestis	KF175300.1	LiJP0231	Adenophora erecta	NC_036222.1		Adenophora capillaris subsp. leptosepala	KU983949.1	MBK:0241347	Adenophora liliifolioides	MF348753.1	isolate AD7LK10	Adenophora capillaris	KU984026.1	NY:60	Adenophora erecta	HQ704593.1	kim2005-3230	Burmeistera almedae	KP014848.1	isolate LL42	Adenophora erecta	NC_036222.1		Adenophora gmelinii	LT706737.1	isolate CAM511	Adenophora capillaris	MK556579.1	BOP205381	Adenophora remotiflora	NC_026999.1
Adenophora capillaris subsp. leptosepala	KU983878.1	MBK:0241347	Adenophora divaricata	HQ704468.1	Yoo75375	Adenophora grandiflora	HQ704482.1	Yoo54257	Burmeistera ceratocarpa	KY045493.1	Muchhala 177	Apetahia longistigmata	MF061165.1		Adenophora coelestis	KF175322.1	YangQ1997	Adenophora coronopifolia	KC146466.1	Yoo18845	Adenophora remotiflora	NC_026999.1		Adenophora coelestis	KU983950.1	US:76284	Adenophora sp.	MF785898.1	US:3598988	Adenophora capillaris subsp. leptosepala	KU984027.1	MBK:0241347	Adenophora gmelinii	LT674097.1	isolate CAM511	Burmeistera auriculata	KY045495.1	Muchhala 120	Adenophora grandiflora	HQ704599.1	Yoo54257	Adenophora lamarckii	LT706725.1	isolate CAM273	Adenophora capillaris subsp. leptosepala	KU984061.1	MBK:0241347	Adenophora stricta	NC_036223.1
Adenophora coelestis	KU983879.1	US:76284	Adenophora erecta	HQ704476.1	Kim2005-3230	Adenophora kayasanensis	HQ704483.1	Yoo75358	Burmeistera crispiloba	KY045492.1	Muchhala 123	Burmeistera auriculata	KY045495.1	Muchhala 120	Adenophora coronopifolia	HQ704519.1	Yoo18845	Adenophora divaricata	EU713323.1	Eddie 96086 (EGHB)	Adenophora stricta	NC_036223.1		Adenophora coronopifolia	KT970315.1		Adenophora triphylla Atri	LC365350.1		Adenophora coelestis	KU984028.1	US:76284	Adenophora grandiflora	HQ704559.1	Yoo54257	Burmeistera borjensis	KY045494.1	Muchhala 154	Adenophora kayasanensis	HQ704600.1	Yoo75358	Adenophora remotiflora	NC_026999.1		Adenophora coelestis	KU984062.1	US:76284	Apetahia longistigmata	MF061165.1
Adenophora coronopifolia	KC146426.1	Yoo18845	Adenophora grandiflora	HQ704442.1	Yoo54257	Adenophora lamarkii	HQ704515.1	Yoo53180	Burmeistera cyclostigmata	KY045491.1	Muchhala 145	Burmeistera borjensis	KY045494.1	Muchhala 154	Adenophora divaricata	KY368998.1	H.J.Kim8088	Adenophora erecta	KC146505.1	Yoo80073	Apetahia longistigmata	MF061165.1		Adenophora divaricata	JX914669.1	isolate 1T	Apetahia longistigmata	MF061165.1		Adenophora coronopifolia	KC146506.1	Yoo18845	Adenophora kayasanensis	HQ704560.1	Yoo75358	Burmeistera ceratocarpa	KP014852.1	isolate LL15	Adenophora lamarkii	HQ704632.1	Yoo53180	Adenophora stricta	NC_036223.1		Adenophora coronopifolia	HQ704636.1	Yoo18845	Apetahia margaretae	DQ285208.1
Adenophora divaricata	KC146455.1	Yoo75375	Adenophora himalayana	MK556060.1	BOP205529	Adenophora liliifolia	HQ704513.1	Yoo143	Burmeistera domingensis	KY045489.1	Muchhala 102	Burmeistera ceratocarpa	KY045493.1	Muchhala 177	Adenophora erecta	KY369001.1	H.J.Kim8411	Adenophora grandiflora	KC146469.1	Yoo54257	Burmeistera auriculata	KY045495.1	Muchhala 120	Adenophora erecta	KT970316.1		Apetahia margaretae	DQ272723.1		Adenophora divaricata	EU713430.1		Adenophora lamarkii	HQ704592.1	Yoo53180	Burmeistera chiriquiensis	KP014858.1	isolate LL132	Adenophora liliifolia	HQ704630.1	Yoo143	Apetahia longistigmata	MF061165.1		Adenophora delavayi	MK556570.1	BOP205069	Brighamia insignis	DQ285178.1
Adenophora erecta	KY368951.1	H.J.Kim8411	Adenophora kayasanensis	HQ704443.1	Yoo75358	Adenophora polyantha	HQ704484.1	Yoo62036	Burmeistera fuscoapicata	NC_035771.1	Clark 12955	Burmeistera crispiloba	KY045492.1	Muchhala 123	Adenophora gmelinii	KU983912.1	H1430013	Adenophora himalayana	KT970185.1		Burmeistera borjensis	KY045494.1	Muchhala 154	Adenophora gmelinii	JX914983.1	isolate CAM511	Azorina vidalii	KY091486.1	AZB:AV-MAPC-001	Adenophora erecta	KC146545.1	Yoo80073	Adenophora lamarckii	LT674077.1	isolate CAM273	Burmeistera crebra	KP014870.1	isolate LL44	Adenophora polyantha	HQ704601.1	Yoo62036	Asyneuma anthericoides	LT706761.1	isolate CAM653	Adenophora divaricata	HQ704638.1	Yoo71616	Brighamia rockii	DQ285179.1
Adenophora gmelinii	KU983881.1	H1430013	Adenophora lamarkii	HQ704475.1	Yoo53180	Adenophora racemosa	HQ704485.1	Yoo58475	Burmeistera loejtnantii	KY045487.1	F 2190436	Burmeistera cyclostigmata	KY045491.1	Muchhala 145	Adenophora gmelinii subsp. nystroemii	KU983913.1	S13-3431	Adenophora jasionifolia	KT970186.1		Burmeistera ceratocarpa	KY045493.1	Muchhala 177	Adenophora gmelinii subsp. nystroemii	KU983953.1	S13-3431	Brighamia insignis	DQ272693.1		Adenophora gmelinii	KU984029.1	H1429999	Adenophora liliifolia	HQ704590.1	Yoo143	Burmeistera crispiloba	KY045492.1	Muchhala 123	Adenophora racemosa	HQ704624.1	Yoo75332	Asyneuma argutum	LT706760.1	isolate CAM517	Adenophora erecta	HQ704673.1	Kim2005-3230	Burmeistera auriculata	KY045495.1
Adenophora gmelinii subsp. nystroemii	KU983882.1	S13-3431	Adenophora liliifolia	HQ704473.1	Yoo143	Adenophora remotiflora	HQ704486.1	Yoo75355	Burmeistera lutosa	KY045486.1	Muchhala 133	Burmeistera domingensis	KY045489.1	Muchhala 102	Adenophora grandiflora	KY369002.1	H.J.Kim8459	Adenophora kayasanensis	KC146470.1	Yoo75358	Burmeistera crispiloba	KY045492.1	Muchhala 123	Adenophora grandiflora	KT970317.1		Brighamia rockii	DQ272694.1		Adenophora gmelinii subsp. nystroemii	KU984031.1	S13-3431	Adenophora nikoensis	AB915763.1	haplotype: A	Burmeistera cyclostigmata	KP014877.1	isolate LL22	Adenophora remotiflora	NC_026999.1		Asyneuma campanuloides	KC455770.1	WU:G.M. Schneeweiss 4469	Adenophora gmelinii	KU984064.1	H1430013	Burmeistera borjensis	KY045494.1
Adenophora grandiflora	KC146429.1	Yoo54257	Adenophora pereskiifolia	MK556059.1	BOP205583	Adenophora remotiflora var. hirticalyx	HQ704488.1	Yoo19500	Burmeistera oyacachensis	KY045485.1	Muchhala 171	Burmeistera fuscoapicata	NC_035771.1	Clark 12955	Adenophora himalayana	KF175327.1	08CS799	Adenophora khasiana	KF175290.1	08CS385	Burmeistera cyclostigmata	DQ356097.1		Adenophora himalayana	KU983954.1	S13-3499	Burmeistera auriculata	KY045495.1	Muchhala 120	Adenophora grandiflora	KC146509.1	Yoo54257	Adenophora polyantha	HQ704561.1	Yoo62036	Burmeistera dendrophila	KP014855.1	isolate LL122	Adenophora remotiflora var. hirticalyx	HQ704605.1	Yoo19500	Asyneuma canescens	KC455771.1	WU:G. Cufodontis 4.8.1949	Adenophora gmelinii subsp. nystroemii	KU984065.1	S13-3431	Burmeistera ceratocarpa	KY045493.1
Adenophora himalayana	KT970113.1		Adenophora petiolata	MK556061.1	BOP205480	Adenophora stricta	NC_036223.1		Burmeistera parviflora	KY045484.1	Lagomarsino 53	Burmeistera loejtnantii	KY045487.1	F 2190436	Adenophora himalayana subsp. alpina	KU983916.1	S-9H-3578	Adenophora lamarckii	KC146502.1	Yoo53180	Burmeistera domingensis	KY045489.1	Muchhala 102	Adenophora himalayana subsp. alpina	KU983955.1	S-9H-3578	Burmeistera borjensis	KY045494.1	Muchhala 154	Adenophora himalayana	KT970149.1		Adenophora racemosa	HQ704562.1	Yoo58475	Burmeistera domingensis	KP014860.1	isolate LL81	Adenophora stricta	NC_036223.1		Asyneuma limoniifolium	KC455767.1	STU:A. W rz 40 24.07.26.01	Adenophora grandiflora	HQ704639.1	Yoo54257	Burmeistera crispiloba	DQ285203.1
Adenophora himalayana subsp. alpina	KU983884.1	S-9H-3578	Adenophora polyantha	MK556054.1	BOP104344	Adenophora taquetii	HQ704518.1	Yoo75384	Burmeistera pirrensis	KY045483.1	Muchhala 491	Burmeistera lutosa	KY045486.1	Muchhala 133	Adenophora hunanensis	EU591977.1		Adenophora liliifolia	KC146500.1	Yoo143	Burmeistera fuscoapicata	NC_035771.1	Clark 12955	Adenophora jasionifolia	KT970334.1		Burmeistera ceratocarpa	KY045493.1	Muchhala 177	Adenophora jasionifolia	KT970150.1		Adenophora remotiflora	NC_026999.1		Burmeistera fuchsioides	KP014865.1	isolate LL199	Adenophora taquetii	HQ704635.1	Yoo75384	Asyneuma lobelioides	KC455764.1	WU:D. Albach & F. zg kce 884	Adenophora himalayana	KU984066.1	S13-3499	Burmeistera cyclostigmata	KY045491.1
Adenophora jasionifolia	KT970114.1		Adenophora potaninii	MK556057.1	BOP205311	Adenophora triphylla var. japonica	HQ704490.1	Yoo63275	Burmeistera resupinata	KY045482.1	Muchhala 223	Burmeistera oyacachensis	KY045485.1	Muchhala 171	Adenophora jasionifolia	KU983917.1	MBK:0241343	Adenophora liliifolioides	JN851163.1		Burmeistera loejtnantii	KY045487.1	F 2190436	Adenophora kayasanensis	KT970318.1		Burmeistera crispiloba	KY045492.1	Muchhala 123	Adenophora kayasanensis	KY369055.1	H.J.Kim8690	Adenophora remotiflora var. hirticalyx	HQ704565.1	Yoo19500	Burmeistera fuscoapicata	NC_035771.1	Clark 12955	Adenophora triphylla var. japonica	HQ704607.1	Yoo63275	Asyneuma persicum	LT706702.1	isolate CAM671	Adenophora himalayana subsp. alpina	KU984067.1	S-9H-3578	Burmeistera domingensis	KY045489.1
Adenophora kayasanensis	KY368955.1	H.J.Kim8690	Adenophora racemosa	HQ704445.1	Yoo58475	Adenophora verticillata	HQ704491.1	Yoo75356	Burmeistera rubrosepala	KY045481.1	Muchhala 220	Burmeistera parviflora	KY045484.1	Lagomarsino 53	Adenophora kayasanensis	KY369005.1	H.J.Kim8690	Adenophora palustris	KT970187.1		Burmeistera lutosa	KY045486.1	Muchhala 133	Adenophora khasiana	KU983956.1	H1589093	Burmeistera cyclostigmata	KY045491.1	Muchhala 145	Adenophora khasiana	KU984035.1	MBK:0241234	Adenophora stricta	HQ704566.1	Yoo61921	Burmeistera loejtnantii	KY045487.1	F 2190436	Adenophora verticillata	HQ704608.1	Yoo75356	Asyneuma pichleri	KC455765.1	WU:B. Frajman & M. Turjak 11087	Adenophora jasionifolia	KT970281.1		Burmeistera fuscoapicata	NC_035771.1
Adenophora khasiana	KU983886.1	MBK:0241234	Adenophora remotiflora	HQ704446.1	Yoo75355	Adenophora verticillata var. hirsuta	HQ704492.1	KHB090825-262	Burmeistera smaragdi	KY045480.1	Muchhala 205	Burmeistera pirrensis	KY045483.1	Muchhala 491	Adenophora khasiana	KF175308.1	LiJ683	Adenophora polyantha	KC146471.1	Yoo62036	Burmeistera oyacachensis	KY045485.1	Muchhala 171	Adenophora lamarckii	KU983982.1	KWNU:53180	Burmeistera domingensis	KY045489.1	Muchhala 102	Adenophora lamarckii	KC146542.1	Yoo53180	Adenophora taquetii	HQ704595.1	Yoo75384	Burmeistera lutosa	KY045486.1	Muchhala 133	Adenophora verticillata var. hirsuta	HQ704609.1	KHB090825-262	Asyneuma trichocalycinum	KC455769.1	C.J. Dixon 11179	Adenophora kayasanensis	HQ704640.1	Yoo75358	Burmeistera loejtnantii	KY045487.1
Adenophora lamarckii	KC146462.1	Yoo53180	Adenophora remotiflora var. hirticalyx	HQ704448.1	Yoo19500	Apetahia longistigmata	MF061165.1		Burmeistera sodiroana	KY045479.1	Muchhala 115	Burmeistera resupinata	KY045482.1	Muchhala 223	Adenophora lamarkii	HQ704553.1	Yoo53180	Adenophora potaninii	KT970188.1		Burmeistera parviflora	KY045484.1	Lagomarsino 53	Adenophora liliifolia	JX915239.1	isolate NC3409	Burmeistera fuscoapicata	NC_035771.1	Clark 12955	Adenophora liliifolia	KC146540.1	Yoo143	Adenophora triphylla	AB915739.1	haplotype: H	Burmeistera mcvaughii	KP014853.1	isolate LL123	Apetahia longistigmata	MF061165.1		Azorina vidalii	LT706564.1	isolate CAM019	Adenophora khasiana	KU984069.1	MBK:0241234	Burmeistera lutosa	KY045486.1
Adenophora liliifolia	KC146460.1	Yoo143	Adenophora stenanthina	MK556053.1	BOP104375	Asyneuma japonicum	HQ704493.1	Yoo75333	Carpodetus serratus	MF770619.1		Burmeistera rubrosepala	KY045481.1	Muchhala 220	Adenophora liliifolia	KU983920.1	H1430060	Adenophora racemosa	KC146494.1	Yoo75332	Burmeistera pirrensis	KY045483.1	Muchhala 491	Adenophora liliifolioides	KU983959.1	HUH39117	Burmeistera loejtnantii	KY045487.1	F 2190436	Adenophora liliifolioides	JN851172.1		Adenophora triphylla var. japonica	HQ704567.1	Yoo63275	Burmeistera microphylla	KP014850.1	isolate LL43	Asyneuma japonicum	HQ704610.1	Yoo75333	Burmeistera auriculata	KY045495.1	Muchhala 120	Adenophora lamarkii	HQ704672.1	Yoo53180	Burmeistera oyacachensis	KY045485.1
Adenophora liliifolioides	KU983888.1	HUH39117	Adenophora stricta	HQ704449.1	Yoo61921	Burmeistera auriculata	KY045495.1	Muchhala 120	Centropogon granulosus	MF061166.1		Burmeistera smaragdi	KY045480.1	Muchhala 205	Adenophora liliifolioides	KF175329.1	08CS775	Adenophora remotiflora	KC146474.1	Yoo75354	Burmeistera resupinata	KY045482.1	Muchhala 223	Adenophora maximowicziana	KU983960.1	MBK:0175137	Burmeistera lutosa	KY045486.1	Muchhala 133	Adenophora maximowicziana	KU984038.1	MBK:0175137	Adenophora verticillata	HQ704568.1	Yoo75356	Burmeistera minutiflora	KP014869.1	isolate LL201	Burmeistera auriculata	KY045495.1	Muchhala 120	Burmeistera borjensis	KY045494.1	Muchhala 154	Adenophora liliifolia	HQ704670.1	Yoo143	Burmeistera parviflora	KY045484.1
Adenophora maximowicziana	KU983889.1	MBK:0175137	Adenophora stricta subsp. stricta	MK556058.1	BOP205647	Burmeistera borjensis	KY045494.1	Muchhala 154	Centropogon nigricans	KY045478.1	Muchhala 118	Burmeistera sodiroana	KY045479.1	Muchhala 115	Adenophora lobophylla	KF279691.1	GS-301	Adenophora remotiflora var. hirticalyx	KC146475.1	Yoo19500	Burmeistera rubrosepala	KY045481.1	Muchhala 220	Adenophora morrisonensis	KU983961.1	HUH8437	Burmeistera oyacachensis	KY045485.1	Muchhala 171	Adenophora morrisonensis	KU984039.1	HUH8437	Adenophora verticillata var. hirsuta	HQ704569.1	KHB090825-262	Burmeistera morii	KP014864.1	isolate LL126	Burmeistera borjensis	KY045494.1	Muchhala 154	Burmeistera ceratocarpa	KY045493.1	Muchhala 177	Adenophora liliifolioides	KU984071.1	HUH39117	Burmeistera pirrensis	KY045483.1
Adenophora morrisonensis	KU983890.1	HUH8437	Adenophora taquetii	HQ704478.1	Yoo75384	Burmeistera ceratocarpa	KY045493.1	Muchhala 177	Clermontia fauriei	NC_035355.1		Campanula punctata	KU198434.1		Adenophora maximowicziana	KU983922.1	MBK:0175137	Adenophora sp.	MF786906.1	US:3598988	Burmeistera smaragdi	KY045480.1	Muchhala 205	Adenophora morrisonensis subsp. uehatae	KU983962.1	US:223687	Burmeistera parviflora	KY045484.1	Lagomarsino 53	Adenophora morrisonensis subsp. uehatae	KU984040.1	US:223687	Asyneuma anthericoides	LT674099.1	isolate CAM653	Burmeistera multiflora	KP014879.1	isolate LL80	Burmeistera ceratocarpa	KY045493.1	Muchhala 177	Burmeistera crispiloba	KY045492.1	Muchhala 123	Adenophora maximowicziana	KU984072.1	MBK:0175137	Burmeistera resupinata	KY045482.1
Adenophora morrisonensis subsp. uehatae	KU983891.1	US:223687	Adenophora trachelioides	MK556063.1	BOP205359	Burmeistera crispiloba	KY045492.1	Muchhala 123	Codonopsis lanceolata	MH018574.1		Campanula rotundifolia	KT176392.1	Steele 1318	Adenophora morrisonensis	KF279686.1	Hsiulan-Ho1214	Adenophora stenanthina	KF175286.1	LJQ_08GN345	Burmeistera sodiroana	KY045479.1	Muchhala 115	Adenophora nikoensis	KU983963.1	MBK:0137550	Burmeistera pirrensis	KY045483.1	Muchhala 491	Adenophora nikoensis	KU984041.1	MBK:0137550	Asyneuma argutum	LT674098.1	isolate CAM517	Burmeistera obtusifolia	KP014851.1	isolate LL32	Burmeistera crispiloba	KY045492.1	Muchhala 123	Burmeistera cyclostigmata	KY045491.1	Muchhala 145	Adenophora morrisonensis	KU984073.1	HUH8437	Burmeistera rubrosepala	KY045481.1
Adenophora nikoensis	KU983892.1	MBK:0137550	Adenophora triphylla var. japonica	HQ704450.1	Yoo63275	Burmeistera cyclostigmata	KY045491.1	Muchhala 145	Cyanea fissa	KY354213.1		Campanula takesimana	KP006497.1		Adenophora morrisonensis subsp. uehatae	KU983924.1	US:223687	Adenophora stricta	NC_036223.1		Campanula asperuloides	DQ356090.1		Adenophora nikoensis var. petrophila	KU983964.1	HUH5801	Burmeistera resupinata	KY045482.1	Muchhala 223	Adenophora nikoensis var. petrophila	KU984042.1	HUH5801	Asyneuma asperum	LT674046.1	isolate CAM671	Burmeistera oyacachensis	KY045485.1	Muchhala 171	Burmeistera cyclostigmata	KY045491.1	Muchhala 145	Burmeistera domingensis	KY045489.1	Muchhala 102	Adenophora morrisonensis subsp. uehatae	KU984074.1	US:223687	Burmeistera smaragdi	KY045480.1
Adenophora nikoensis var. petrophila	KU983893.1	HUH5801	Adenophora verticillata	HQ704451.1	Yoo75356	Burmeistera domingensis	KY045489.1	Muchhala 102	Cyanea leptostegia	MF061168.1		Carpodetus serratus	MF770619.1		Adenophora nikoensis	KU983925.1	MBK:0137550	Adenophora sublata	KT970189.1		Campanula punctata	KU198434.1		Adenophora palustris	KT970335.1		Burmeistera rubrosepala	KY045481.1	Muchhala 220	Adenophora palustris	KT970151.1		Asyneuma campanuloides	LT673916.1	isolate CAM045	Burmeistera parviflora	KP014859.1	isolate LL20	Burmeistera domingensis	KY045489.1	Muchhala 102	Burmeistera fuscoapicata	NC_035771.1	Clark 12955	Adenophora nikoensis	KU984075.1	MBK:0137550	Burmeistera sodiroana	KY045479.1
Adenophora palustris	KT970115.1		Adenophora verticillata var. hirsuta	HQ704452.1	KHB090825-262	Burmeistera fuscoapicata	NC_035771.1	Clark 12955	Cyphia angustiloba	MF770621.1		Centropogon granulosus	MF061166.1		Adenophora nikoensis var. petrophila	KU983926.1	HUH5801	Adenophora taquetii	KC146504.1	Yoo75384	Campanula ramosa	L39387.2		Adenophora paniculata	KU983965.1	S13-3753	Burmeistera smaragdi	KY045480.1	Muchhala 205	Adenophora paniculata	KU984043.1	S13-3753	Asyneuma japonicum	HQ704570.1	Yoo75333	Burmeistera pirrensis	KY045483.1	Muchhala 491	Burmeistera fuscoapicata	NC_035771.1	Clark 12955	Burmeistera loejtnantii	KY045487.1	F 2190436	Adenophora nikoensis var. petrophila	KU984076.1	HUH5801	Campanula punctata	KU198434.1
Adenophora polyantha	KC146431.1	Yoo62036	Apetahia longistigmata	DQ285272.1		Burmeistera loejtnantii	KY045487.1	F 2190436	Cyphia banksiana	MF770622.1		Centropogon nigricans	KY045478.1	Muchhala 118	Adenophora palustris	KY369006.1	H.J.Kim8168	Adenophora trachelioides	KF175292.1	LuoY386	Campanula rotundifolia	KT176863.1	Steele 1318	Adenophora pereskiifolia	JX914985.1	isolate CAM513	Burmeistera sodiroana	KY045479.1	Muchhala 115	Adenophora pereskiifolia	KU984044.1	H1430057	Asyneuma lobelioides	LT674080.1	isolate CAM283	Burmeistera racemiflora	KP014845.1	isolate 6	Burmeistera loejtnantii	KY045487.1	F 2190436	Burmeistera lutosa	KY045486.1	Muchhala 133	Adenophora palustris	KU984091.1	KWNU:92048	Campanula takesimana	KP006497.1
Adenophora potaninii	KT970116.1		Apetahia margaretae	DQ285286.1		Burmeistera lutosa	KY045486.1	Muchhala 133	Cyphia belfastica	MF770623.1		Clermontia fauriei	NC_035355.1		Adenophora paniculata	KF279687.1	GS-01	Adenophora triphylla	KT970190.1		Campanula takesimana	KP006497.1		Adenophora polyantha	KT970319.1		Campanula aparinoides	MF348447.1	isolate AD5JS48	Adenophora polyantha	KC146511.1	Yoo62036	Azorina vidalii	LT673901.1	isolate CAM019	Burmeistera refracta	KP014880.1	isolate LL79	Burmeistera lutosa	KY045486.1	Muchhala 133	Burmeistera oyacachensis	KY045485.1	Muchhala 171	Adenophora paniculata	KU984077.1	S13-3753	Carpodetus serratus	MF770619.1
Adenophora racemosa	KY368959.1	H.J.Kim8258	Asyneuma japonicum	HQ704453.1	Yoo75333	Burmeistera oyacachensis	KY045485.1	Muchhala 171	Cyphia bulbosa var. bulbosa	MF770624.1		Codonopsis lanceolata	MH018574.1		Adenophora pereskiifolia	KU983928.1	H1430057	Adenophora triphylla var. japonica	KC146477.1	Yoo63275	Canarina canariensis	DQ356087.1		Adenophora potaninii	KT970336.1		Campanula austroadriatica	KC180972.1	isolate #163	Adenophora potaninii	KT970152.1		Brighamia insignis	DQ285100.1		Burmeistera resupinata	KY045482.1	Muchhala 223	Burmeistera oyacachensis	KY045485.1	Muchhala 171	Burmeistera parviflora	KY045484.1	Lagomarsino 53	Adenophora pereskiifolia	MK556582.1	BOP205583	Centropogon granulosus	MF061166.1
Adenophora remotiflora	KY368962.1	H.J.Kim8527	Azorina vidalii	KY091315.1	AZB:AV-PIAM-002	Burmeistera parviflora	KY045484.1	Lagomarsino 53	Cyphia crenata	NC_036089.1		Codonopsis minima	NC_036311.1		Adenophora petiolata	KF279688.1	GS-G9514	Adenophora verticillata	KC146478.1	Yoo75356	Carpodetus serratus	AJ238336.1		Adenophora racemosa	KT970320.1		Campanula barbata	HG800505.1	specimen MIB:ZPL:07310	Adenophora racemosa	KC146512.1	Yoo58475	Brighamia rockii	DQ285101.1		Burmeistera rubrosepala	KY045481.1	Muchhala 220	Burmeistera parviflora	KY045484.1	Lagomarsino 53	Burmeistera pirrensis	KY045483.1	Muchhala 491	Adenophora petiolata	MK556581.1	BOP205480	Centropogon gutierrezii	DQ285204.1
Adenophora remotiflora var. hirticalyx	KC146435.1	Yoo19500	Brighamia insignis	DQ285256.1		Burmeistera pirrensis	KY045483.1	Muchhala 491	Cyphia dentariifolia	NC_036090.1		Cyanea fissa	KY354213.1		Adenophora polyantha	KF175318.1	ZhaoZT0203	Adenophora verticillata var. abbreviata	KT970191.1		Centropogon cornutus	DQ356106.1		Adenophora remotiflora	KT970321.1		Campanula bravensis	KY091514.1		Adenophora remotiflora	KC146514.1	Yoo75354	Burmeistera auriculata	KY045495.1	Muchhala 120	Burmeistera smaragdi	KY045480.1	Muchhala 205	Burmeistera pirrensis	KY045483.1	Muchhala 491	Burmeistera resupinata	KY045482.1	Muchhala 223	Adenophora polyantha	HQ704641.1	Yoo62036	Centropogon nigricans	KY045478.1
Adenophora stenanthina	KU983896.1	HUH25918	Brighamia rockii	DQ285257.1		Burmeistera resupinata	KY045482.1	Muchhala 223	Cyphia elata var. gerrardii	MF770627.1		Cyanea leptostegia	MF061168.1		Adenophora potaninii	MH712604.1	Ge130781	Adenophora verticillata var. hirsuta	KC146479.1	KHB090825-262	Centropogon granulosus	MF061166.1		Adenophora remotiflora var. hirticalyx	KT970322.1		Campanula cervicaria	KY785162.1	haplotype h54 pop variant Pirin	Adenophora stenanthina	KU984046.1	US:655335	Burmeistera borjensis	KY045494.1	Muchhala 154	Burmeistera sodiroana	KP014867.1	isolate LL77	Burmeistera resupinata	KY045482.1	Muchhala 223	Burmeistera rubrosepala	KY045481.1	Muchhala 220	Adenophora potaninii	KT970283.1		Clermontia arborescens	DQ285180.1
Adenophora stricta	KU983897.1	HUH52	Burmeistera auriculata	KY045495.1	Muchhala 120	Burmeistera rubrosepala	KY045481.1	Muchhala 220	Cyphia glandulifera	MF770628.1		Cyphia angustiloba	MF770621.1		Adenophora racemosa	HQ704545.1	Yoo75332	Adenophora wilsonii	KT970192.1		Centropogon granulosus subsp. granulosus	DQ356101.1		Adenophora stenanthina	JX914986.1	isolate CAM514	Campanula cochleariifolia	HG800506.1	specimen MIB:ZPL:04325	Adenophora stricta	KC146516.1	Yoo61921	Burmeistera ceratocarpa	KY045493.1	Muchhala 177	Burmeistera sp.	KP014857.1	Santamaria 6640 isolate LL9	Burmeistera rubrosepala	KY045481.1	Muchhala 220	Burmeistera smaragdi	KY045480.1	Muchhala 205	Adenophora racemosa	HQ704642.1	Yoo58475	Clermontia calophylla	KC469902.1
Adenophora sublata	KT970117.1		Burmeistera borjensis	KY045494.1	Muchhala 154	Burmeistera smaragdi	KY045480.1	Muchhala 205	Cyphia phyteuma	MF770629.1		Cyphia banksiana	MF770622.1		Adenophora remotiflora	AY548197.1		Apetahia longistigmata	MF061165.1		Centropogon luteus	DQ356100.1		Adenophora stricta	JX914674.1	isolate CAM122	Campanula divaricata	KP643407.1	SNP_13_0368	Adenophora confusa	AY655145.1		Burmeistera crispiloba	DQ285125.1		Burmeistera succulenta	KP014866.1	isolate LL210	Burmeistera smaragdi	KY045480.1	Muchhala 205	Burmeistera sodiroana	KY045479.1	Muchhala 115	Adenophora remotiflora	EF088693.1	isolate CR1	Clermontia clermontioides	KC469903.1
Adenophora taquetii	KY368968.1	H.J.Kim8826	Burmeistera ceratocarpa	KY045493.1	Muchhala 177	Burmeistera sodiroana	KY045479.1	Muchhala 115	Cyphia schlechteri	MF770630.1		Cyphia belfastica	MF770623.1		Adenophora remotiflora var. hirticalyx	HQ704528.1	Yoo19500	Asyneuma japonicum	KC146480.1	Yoo75333	Centropogon nigricans	KY045478.1	Muchhala 118	Adenophora sublata	KT970337.1		Campanula elatinoides	HG800507.1	specimen MIB:ZPL:04330	Adenophora sublata	KU984051.1	H1703142	Burmeistera cyclostigmata	KY045491.1	Muchhala 145	Burmeistera tenuiflora	KP014881.1	isolate LL36	Burmeistera sodiroana	KY045479.1	Muchhala 115	Campanula acutiloba	LT706756.1	isolate CAM318	Adenophora remotiflora var. hirticalyx	HQ704645.1	Yoo19500	Clermontia drepanomorpha	KC469904.1
Adenophora tricuspidata	KU983901.1	NY11688	Burmeistera crispiloba	DQ285281.1		Campanula glomerata var. dahurica	HQ704494.1	Yoo75359	Cyphia tortilis	MF770631.1		Cyphia bulbosa var. bulbosa	MF770624.1		Adenophora sp.	MH626536.1	DX-2018 JS156	Asyneuma virgatum	EU713332.1	Berlin-Dahlem Bot.Gart 0104 (OS)	Centropogon trichodes	DQ356098.1		Adenophora taquetii	KT970323.1		Campanula erinus	KY091497.1	AZB:CE-MDCF-001	Adenophora taquetii	KY369068.1	H.J.Kim8826	Burmeistera domingensis	KY045489.1	Muchhala 102	Burmeistera toroensis	KP014868.1	isolate LL29	Campanula glomerata var. dahurica	HQ704611.1	Yoo75359	Campanula afra	LT706678.1	isolate CAM491	Adenophora stenanthina	KU984081.1	HUH25918	Clermontia fauriei	NC_035355.1
Adenophora triphylla	KT970118.1		Burmeistera cyclostigmata	KY045491.1	Muchhala 145	Campanula punctata	HQ704495.1	Yoo75339	Delissea rhytidosperma	KY354214.1		Cyphia crenata	NC_036089.1		Adenophora stenanthina	KF175311.1	ChenSL0489	Azorina vidalii	KY091394.1	AZB:AV-TEPM-001	Clermontia fauriei	NC_035355.1		Adenophora tricuspidata	KU983974.1	NY11688	Campanula foliosa	KY785155.1	haplotype h45 pop variant Prokletije Grebaja	Adenophora trachelioides	KF175353.1	BianFH0122	Burmeistera fuscoapicata	NC_035771.1	Clark 12955	Burmeistera utleyi	KP014856.1	isolate LL121	Campanula punctata	KU198434.1		Campanula aizoon	LT706735.1	isolate CAM407	Adenophora stricta	HQ704646.1	Yoo61921	Clermontia grandiflora	KC469905.1
Adenophora triphylla var. japonica	KY368970.1	H.J.Kim8678	Burmeistera domingensis	KY045489.1	Muchhala 102	Campanula takesimana	KP006497.1		Dialypetalum floribundum	MF061169.1		Cyphia dentariifolia	NC_036090.1		Adenophora stricta	MH710859.1	Ge131089	Berenice arguta	EU713339.1	Strasberg 10102000 (EGHB)	Codonopsis lanceolata	MH018574.1		Adenophora triphylla	KT970338.1		Campanula glomerata	KY785148.1	haplotype h38 pop variant Prenj	Adenophora tricuspidata	KU984053.1	NY11688	Burmeistera loejtnantii	KY045487.1	F 2190436	Burmeistera variabilis	KP014846.1	isolate LL211	Campanula rapunculoides	HQ593921.1	AP217	Campanula alliariifolia	LT706569.1	isolate CAM049	Adenophora sublata	KT970284.1		Clermontia hawaiiensis	KC469907.1
Adenophora verticillata	KY368975.1	H.J.Kim8585	Burmeistera fuscoapicata	NC_035771.1	Clark 12955	Carpodetus serratus	MF770619.1		Diastatea micrantha	MF061170.1		Cyphia elata var. gerrardii	MF770627.1		Adenophora sublata	KU983936.1	H1703142	Burmeistera auriculata	KY045495.1	Muchhala 120	Codonopsis minima	NC_036311.1		Adenophora triphylla var. japonica	KT970324.1		Campanula jacobaea	KY091521.1		Adenophora triphylla	KT970153.1		Burmeistera lutosa	KY045486.1	Muchhala 133	Burmeistera vulgaris	KP014872.1	isolate 16	Campanula rotundifolia	KT178607.1	Steele 1318	Campanula alpina	LT706588.1	isolate CAM076	Adenophora taquetii	HQ704675.1	Yoo75384	Clermontia kakeana	KC469910.1
Adenophora verticillata var. abbreviata	KY368947.1	H.J.Kim8835	Burmeistera loejtnantii	KY045487.1	F 2190436	Centropogon granulosus	MF061166.1		Downingia cuspidata	MF061171.1		Cyphia glandulifera	MF770628.1		Adenophora taquetii	KY369018.1	H.J.Kim8826	Burmeistera borjensis	KY045494.1	Muchhala 154	Corokia cotoneaster	AF130182.1		Adenophora verticillata	KT970325.1		Campanula lingulata	KJ146656.1	isolate individual #1 pop-variant Vujan	Adenophora triphylla var. japonica	KC146517.1	Yoo63275	Burmeistera oyacachensis	KY045485.1	Muchhala 171	Burmeistera zurquiensis	KP014849.1	isolate LL38	Campanula takesimana	KP006497.1		Campanula alsinoides	LT706675.1	isolate CAM490	Adenophora tricuspidata	KU984085.1	H1430011	Clermontia kohalae	KC469912.1
Adenophora verticillata var. hirsuta	KY368954.1	H.J.Kim8593	Burmeistera lutosa	KY045486.1	Muchhala 133	Centropogon nigricans	KY045478.1	Muchhala 118	Downingia elegans	MF061172.1		Cyphia phyteuma	MF770629.1		Adenophora trachelioides	AY548196.1	isolate ad4	Burmeistera ceratocarpa	KY045493.1	Muchhala 177	Cuttsia viburnea	AJ277382.1		Adenophora verticillata var. abbreviata	KT970339.1		Campanula moesiaca	KY785163.1	haplotype h51 pop variant Stara planina Ponor	Adenophora verticillata	KC146518.1	Yoo75356	Burmeistera parviflora	KY045484.1	Lagomarsino 53	Centropogon aequatorialis	KP014957.1	isolate LL63	Carpodetus serratus	MF770619.1		Campanula anchusiflora	LT706706.1	isolate CAM727	Adenophora tricuspidata	KU984086.1	NY11688	Clermontia lindseyana	KC469913.1
Adenophora wilsonii	KT970120.1		Burmeistera oyacachensis	KY045485.1	Muchhala 171	Clermontia fauriei	NC_035355.1		Echinocodon lobophyllus	MH029157.1		Cyphia schlechteri	MF770630.1		Adenophora tricuspidata	KU983938.1	NY11688	Burmeistera crispiloba	KY045492.1	Muchhala 123	Cyananthus microphyllus	AF130186.1		Adenophora verticillata var. hirsuta	KT970326.1		Campanula pallida	KY070869.1	isolate BOP018011	Adenophora verticillata var. abbreviata	KT970154.1		Burmeistera pirrensis	KY045483.1	Muchhala 491	Centropogon argutus	KU670689.1	isolate LL243	Centropogon granulosus	MF061166.1		Campanula andina	LT706681.1	isolate CAM519	Adenophora triphylla	KU984089.1	HUH s.n.	Clermontia montis-loa	KC469915.1
Apetahia longistigmata	MF061165.1		Burmeistera parviflora	KY045484.1	Lagomarsino 53	Codonopsis affinis	KP318255.1	HUH359211	Grammatotheca bergiana	MF770632.1		Cyphia tortilis	MF770631.1		Adenophora triphylla	KY829520.1	isolate AT_DG	Burmeistera cyclostigmata	KY045491.1	Muchhala 145	Cyanea fissa	KY354213.1		Adenophora wilsonii	KT970340.1		Campanula punctata	LC365339.1	Cpun	Adenophora verticillata var. hirsuta	KC146519.1	KHB090825-262	Burmeistera resupinata	KY045482.1	Muchhala 223	Centropogon asclepiadeus	KP014927.1	isolate LL61	Centropogon nigricans	KY045478.1	Muchhala 118	Campanula andrewsii	LT706624.1	isolate CAM194	Adenophora triphylla var. japonica	HQ704647.1	Yoo63275	Clermontia oblongifolia	KC469916.1
Asyneuma japonicum	KC146440.1	Yoo75333	Burmeistera pirrensis	KY045483.1	Muchhala 491	Codonopsis argentea	KP318256.1	NY627	Hippobroma longiflora	MF061173.1		Delissea rhytidosperma	KY354214.1		Adenophora triphylla var. japonica	KY829523.1	isolate ATJ_BC	Burmeistera domingensis	KY045489.1	Muchhala 102	Cyanea leptostegia	MF061168.1		Apetahia longistigmata	MF061165.1		Campanula pyramidalis	KC180915.1	isolate #127	Adenophora wilsonii	KT970155.1		Burmeistera rubrosepala	KY045481.1	Muchhala 220	Centropogon azuayensis	KP014931.1	isolate LL238	Centropogon valeri	GQ429111.1	LA8268	Campanula aparinoides	LT706755.1	isolate CAM305	Adenophora verticillata	HQ704648.1	Yoo75356	Clermontia pallida	KC469917.1
Asyneuma virgatum	EU437665.1		Burmeistera resupinata	KY045482.1	Muchhala 223	Codonopsis benthamii	KP318257.1	HUH359209	Hypsela tridens	MF061174.1		Dialypetalum floribundum	MF061169.1		Adenophora verticillata	KY369022.1	H.J.Kim8371	Burmeistera fuscoapicata	NC_035771.1	Clark 12955	Cyphia angustiloba	MF770621.1		Asyneuma argutum	JX914988.1	isolate CAM516	Campanula raineri	HG800509.1	specimen MIB:ZPL:04324	Asyneuma japonicum	KC146520.1	Yoo75333	Burmeistera smaragdi	KY045480.1	Muchhala 205	Centropogon baezanus	KP014836.1	isolate LL64	Clermontia fauriei	NC_035355.1		Campanula argaea	LT706623.1	isolate CAM193	Adenophora verticillata var. abbreviata	KT970286.1		Clermontia parviflora	DQ285210.1
Azorina vidalii	EU437601.1		Burmeistera rubrosepala	KY045481.1	Muchhala 220	Codonopsis bulleyana	KP318258.1	NY29167	Isotoma hypocrateriformis	MF061176.1	isolate K5274	Diastatea micrantha	MF061170.1		Adenophora verticillata var. abbreviata	KY368997.1	H.J.Kim8835	Burmeistera loejtnantii	KY045487.1	F 2190436	Cyphia banksiana	MF770622.1		Asyneuma campanuloides	FN396978.1	isolate CAM045	Campanula rapunculoides	KP643549.1	SNP_13_0440	Asyneuma limonifolium	EU643704.1		Burmeistera sodiroana	KY045479.1	Muchhala 115	Centropogon bangii	KP014826.1	isolate 17	Codonopsis affinis	KP318147.1	HUH359211	Campanula ariana	LT706674.1	isolate CAM489	Adenophora verticillata var. hirsuta	HQ704649.1	KHB090825-262	Clermontia peleana	KC469918.1
Berenice arguta	EU437672.1		Burmeistera smaragdi	KY045480.1	Muchhala 205	Codonopsis canescens	KP318259.1	HUH359225	Isotoma tridens	NC_035362.1		Downingia cuspidata	MF061171.1		Adenophora verticillata var. hirsuta	HQ704532.1	KHB090825-262	Burmeistera lutosa	KY045486.1	Muchhala 133	Cyphia belfastica	MF770623.1		Asyneuma canescens	FN396979.1	isolate CAM001	Campanula rapunculus	HE966531.1	specimen MIB:ZPL:03194	Asyneuma lobelioides	EU643733.1		Campanula acutiloba	LT674086.1	isolate CAM318	Centropogon brittonianus	KP015005.1	isolate 21	Codonopsis argentea	KP318148.1	NY627	Campanula armazica	LT706568.1	isolate CAM031	Adenophora wilsonii	KT970287.1		Clermontia persicifolia	KC469920.1
Burmeistera auriculata	KY045495.1	Muchhala 120	Burmeistera sodiroana	KY045479.1	Muchhala 115	Codonopsis chimiliensis	KP318260.1	US1378070	Legenere valdiviana	NC_035364.1		Downingia elegans	MF061172.1		Adenophora wawreana	KF279689.1	GS-G01	Burmeistera oyacachensis	KY045485.1	Muchhala 171	Cyphia bulbosa var. bulbosa	MF770624.1		Asyneuma japonicum	KT970327.1		Campanula rotundifolia	FR865087.1	specimen MIB Zpl:02019	Asyneuma virgatum	AY655146.1		Campanula afra	LT674022.1	isolate CAM491	Centropogon cf. weberbaueri	KP014935.1	Lagomarsino 351 isolate LL174	Codonopsis benthamii	KP318149.1	HUH359209	Campanula armena	LT706622.1	isolate CAM192	Apetahia longistigmata	DQ285155.1		Clermontia pyrularia	KC469921.1
Burmeistera borjensis	EF174652.1	Muchhala 154	Campanula alpestris	EF213343.1	SS-05-167	Codonopsis chlorocodon	KP318261.1	NY28739	Lithotoma petraea	NC_033365.1		Grammatotheca bergiana	MF770632.1		Adenophora wilsonii	MH710710.1	Ge130857	Burmeistera parviflora	KY045484.1	Lagomarsino 53	Cyphia crenata	NC_036089.1		Asyneuma lobelioides	JX914801.1	isolate CAM272	Campanula scheuchzeri	HG800510.1	specimen MIB:ZPL:03507	Azorina vidalii	EU713373.1		Campanula aizoon	LT674095.1	isolate CAM407	Centropogon coccineus	KP014955.1	isolate LL8	Codonopsis bulleyana	KP318150.1	NY29167	Campanula aucheri	LT706634.1	isolate CAM217	Apetahia margaretae	DQ285169.1		Clermontia samuelii	KC469922.1
Burmeistera ceratocarpa	KY045493.1	Muchhala 177	Campanula aristata	MK556050.1	BOP205081	Codonopsis clematidea	KP318262.1	JE5398	Lobelia aberdarica	NC_035365.1		Hanabusaya asiatica	KJ477692.1	Yoo86859	Asyneuma campanuloides	DQ304586.1		Burmeistera pirrensis	KY045483.1	Muchhala 491	Cyphia dentariifolia	NC_036090.1		Asyneuma michauxioides	JX914800.1	isolate CAM271	Campanula secundiflora	KC180999.1	isolate #600	Berenice arguta	EU713446.1		Campanula alliariifolia	LT673907.1	isolate CAM049	Centropogon comosus	KP014937.1	isolate 29	Codonopsis canescens	KP318151.1	HUH359225	Campanula axillaris	LT706731.1	isolate CAM319	Apetahia raiateensis	MG053376.1	isolate Y57	Clermontia tuberculata	KC469923.1
Burmeistera crassifolia	EF174659.1	Muchhala 121	Campanula armena	MK556027.1	BOP104967	Codonopsis convolvulacea	KP318280.1	HUH359224	Lobelia acrochila	NC_035366.1		Hippobroma longiflora	MF061173.1		Asyneuma canescens	KC455546.1	NHMR B. Surina 448	Burmeistera resupinata	KY045482.1	Muchhala 223	Cyphia elata var. gerrardii	MF770627.1		Asyneuma virgatum	JX914670.1	isolate 2T	Campanula sibirica subsp. divergens	KY785167.1	haplotype h59 pop variant Carasova	Brighamia insignis	AF042664.1		Campanula alpina	LT673928.1	isolate CAM076	Centropogon congestus	KP014822.1	isolate LL21	Codonopsis chimiliensis	KP318152.1	US1378070	Campanula balansae	LT706649.1	isolate CAM320	Apetahia seigelii	MG053364.1	isolate Y44	Clermontia waimeae	KC469924.1
Burmeistera crispiloba	EF174640.1	Muchhala 123	Campanula bertolae	MK555985.1	BOP104466	Codonopsis convolvulacea subsp. forrestii	KP318282.1	US3043512	Lobelia anceps	NC_033366.1		Hypsela tridens	MF061174.1		Asyneuma comosiforme	FJ426592.1		Burmeistera rubrosepala	KY045481.1	Muchhala 220	Cyphia glandulifera	MF770628.1		Azorina vidalii	KJ910717.1	A21000	Campanula sp.	KY785164.1	JA-2018 haplotype h56 pop variant Skadar	Burmeistera auriculata	KY045495.1	Muchhala 120	Campanula alsinoides	LT674019.1	isolate CAM490	Centropogon cordifolius	KP014945.1	isolate LL106	Codonopsis chlorocodon	KP318153.1	NY28739	Campanula balfourii	LT706646.1	isolate CAM287	Asyneuma anthericoides	GQ254894.1	isolate 1645	Cyanea acuminata	DQ285183.1
Burmeistera cyclostigmata	KY045491.1	Muchhala 145	Campanula betulifolia	EF213344.1	SS-04-09	Codonopsis convolvulacea subsp. vinciflora	KP318281.1	S13-6898	Lobelia bambuseti	MF061181.1		Isotoma hypocrateriformis	MF061176.1	isolate K5274	Asyneuma japonicum	KY369013.1	H.J.Kim8484	Burmeistera smaragdi	KY045480.1	Muchhala 205	Cyphia phyteuma	MF770629.1		Brighamia insignis	FN396981.1	isolate CAM025	Campanula tommasiniana	KC181001.1	isolate #1662	Burmeistera borjensis	EF174652.1	Muchhala 154	Campanula anchusiflora	LT674050.1	isolate CAM727	Centropogon cornutus	KP014809.1	isolate 31	Codonopsis clematidea	KP318154.1	JE5398	Campanula barbata	LT706582.1	isolate CAM052	Asyneuma campanuloides	GQ254895.1	isolate 1658	Cyanea coriacea	DQ285184.1
Burmeistera cylindrocarpa	EF174658.1	Muchhala 202	Campanula caespitosa	MK555986.1	BOP104473	Codonopsis cordifolioidea	KP318263.1	MBK29302	Lobelia baumannii	MF770633.1		Isotoma tridens	NC_035362.1		Asyneuma limoniifolium	KC455543.1	STU:A. W rz 40 24.07.26.01	Burmeistera sodiroana	KY045479.1	Muchhala 115	Cyphia rogersii	AJ238339.1		Burmeistera auriculata	KY045495.1	Muchhala 120	Campanula trachelium subsp. trachelium	HE966532.1	specimen MIB:ZPL:03224	Burmeistera ceratocarpa	KY045493.1	Muchhala 177	Campanula andina	LT674025.1	isolate CAM519	Centropogon costaricae	KP014948.1	isolate 32	Codonopsis convolvulacea	KP318172.1	HUH359224	Campanula bayerniana	LT706682.1	isolate CAM522	Asyneuma canescens	FJ426567.1		Cyanea fissa	KY354213.1
Burmeistera domingensis	KY045489.1	Muchhala 102	Campanula calcicola	MK556066.1	BOP205082	Codonopsis efilamentosa	KP318283.1	US1213698	Lobelia bequaertii	MF061182.1		Legenere valdiviana	NC_035364.1		Asyneuma lobelioides	KC455541.1	WU:D. Albach & F. zg kce 884	Campanula aizoides	EU713329.1	Edwards 34 (YU)	Cyphia schlechteri	MF770630.1		Burmeistera borjensis	KY045494.1	Muchhala 154	Campanula trautvetteri	KY785151.1	haplotype h41 pop variant Bakuriani	Burmeistera crassifolia	EF174659.1	Muchhala 121	Campanula andrewsii	LT673966.1	isolate CAM194	Centropogon densiflorus	KP014820.1	isolate LL78	Codonopsis convolvulacea subsp. forrestii	KP318174.1	US3043512	Campanula bellidifolia subsp. saxifraga	LT706593.1	isolate CAM093	Asyneuma chinense	MK556571.1	BOP205080	Cyanea floribunda	DQ285212.1
Burmeistera fuscoapicata	NC_035771.1	Clark 12955	Campanula carnica	MK555998.1	BOP104560	Codonopsis farreri	KP318265.1	US3514514	Lobelia boninensis	KY354217.1		Lithotoma petraea	NC_033365.1		Asyneuma pichleri	KC455542.1	WU:B. Frajman & M. Turjak 11087	Campanula alliariifolia	EU713269.1	Cosner s.n. (OS)	Cyphia tortilis	MF770631.1		Burmeistera ceratocarpa	KY045493.1	Muchhala 177	Campanula tymphaea	KJ146678.1	isolate individual #1 pop-variant Pind Mt	Burmeistera crispiloba	EF174641.1	Raguso s.n. 2	Campanula aparinoides	LT674085.1	isolate CAM305	Centropogon dianae	KP014988.1	isolate LL195	Codonopsis convolvulacea subsp. vinciflora	KP318173.1	S13-6898	Campanula betonicifolia	LT706653.1	isolate CAM321	Asyneuma comosiforme	FJ426572.1		Cyanea hirtella	DQ285214.1
Burmeistera glabrata	EF174656.1	Muchhala 165	Campanula cenisia	MK555987.1	BOP104485	Codonopsis javanica	KP318279.1	US3525946	Lobelia burttii subsp. burttii	MF061183.1		Lobelia aberdarica	NC_035365.1		Asyneuma trichocalycinum	KC455544.1	C.J. Dixon 11179	Campanula alpestris	KJ512557.1		Delissea rhytidosperma	KY354214.1		Burmeistera crispiloba	KY045492.1	Muchhala 123	Campanula versicolor	KC180943.1	isolate #415	Burmeistera cyclostigmata	EF174638.1	Muchhala 144	Campanula argaea	LT673965.1	isolate CAM193	Centropogon dissectus	KP014992.1	isolate 34	Codonopsis cordifolioidea	KP318155.1	MBK29302	Campanula betulifolia	LT706597.1	isolate CAM102	Asyneuma japonicum	HQ704650.1	Yoo75333	Cyanea kuhihewa	DQ285216.1
Burmeistera holm-nielsenii	EF174647.1	Muchhala 134	Campanula cervicaria	MK555988.1	BOP104486	Codonopsis kawakamii	KP318268.1	US3241228	Lobelia burttii subsp. meruensis	MF061184.1		Lobelia acrochila	NC_035366.1		Azorina vidalii	HQ202118.1	H. Schaefer & M. Carine SJ18 (BM) clone 1	Campanula alpina	KJ482045.1	isolate 3896p9C	Dialypetalum floribundum	MF061169.1		Burmeistera cyclostigmata	KY045491.1	Muchhala 145	Campanula waldsteiniana	KC181000.1	isolate #1660	Burmeistera cylindrocarpa	EF174657.1	Muchhala 126	Campanula ariana	LT674018.1	isolate CAM489	Centropogon dombeyanus	KP014986.1	isolate LL163	Codonopsis efilamentosa	KP318175.1	US1213698	Campanula bononiensis	LT706621.1	isolate CAM191	Asyneuma limonifolium	EF088694.1	isolate CR2	Cyanea leptostegia	DQ285211.1
Burmeistera loejtnantii	KY045487.1	F 2190436	Campanula chamissonis	MK555989.1	BOP104493	Codonopsis lanceolata	HQ704497.1	Yoo62006	Lobelia burttii subsp. telmaticola	MF061185.1		Lobelia anceps	NC_033366.1		Brighamia insignis	EU219385.1		Campanula alpina subsp. orbelica	KJ482032.1	isolate 3640p1C	Dialypetalum sp.	AJ318989.1	Gustafsson 244	Burmeistera domingensis	KY045489.1	Muchhala 102	Centropogon granulosus	MF061166.1		Burmeistera domingensis	DQ356148.1		Campanula armazica	LT673906.1	isolate CAM031	Centropogon eilersii	KU670685.1	isolate LL249	Codonopsis farreri	KP318157.1	US3514514	Campanula buseri	LT706701.1	isolate CAM660	Asyneuma limoniifolium	KC455652.1	STU:A. W rz 40 24.07.26.01	Cyanea pilosa subsp. longipedunculata	DQ285213.1
Burmeistera lutosa	KY045486.1	Muchhala 133	Campanula cochleariifolia	MK555990.1	BOP104500	Codonopsis minima	NC_036311.1		Lobelia cardinalis	NC_036097.1		Lobelia bambuseti	MF061181.1		Burmeistera sp.	LN899772.1	1 MK-2015, isolate ED1194	Campanula americana	MK519736.1	v0083042WIS	Diastatea micrantha	MF061170.1		Burmeistera fuscoapicata	NC_035771.1	Clark 12955	Centropogon gutierrezii	DQ272719.1		Burmeistera fuscoapicata	NC_035771.1	Clark 12955	Campanula armena	LT673964.1	isolate CAM192	Centropogon erythraeus	KP014936.1	isolate 37	Codonopsis foetens subsp. nervosa	KP318159.1	HUH359220	Campanula californica	LT706729.1	isolate CAM312	Asyneuma lobelioides	FJ426568.1		Cyphia angustiloba	MF770621.1
Burmeistera multiflora	EF174637.1	Raguso s.n. 1	Campanula collina	EF213345.1	SS-05-185	Codonopsis ovata	KP318269.1	US1609608	Lobelia chinensis	NC_035370.1		Lobelia baumannii	MF770633.1		Campanula abietina	MK651989.1	isolate BOP104445	Campanula aparinoides	MG224846.1	RBG-Blitz 032	Echinocodon lobophyllus	MH029157.1		Burmeistera loejtnantii	KY045487.1	F 2190436	Centropogon nigricans	KY045478.1	Muchhala 118	Burmeistera glabrata	EF174656.1	Muchhala 165	Campanula axillaris	LT674087.1	isolate CAM319	Centropogon featherstonei	KP014933.1	isolate LL158	Codonopsis kawakamii	KP318160.1	US3241228	Campanula camptoclada	LT706629.1	isolate CAM207	Asyneuma pichleri	FJ426569.1		Cyphia banksiana	MF770622.1
Burmeistera oyacachensis	KY045485.1	Muchhala 171	Campanula crassipes	MK555991.1	BOP104504	Codonopsis pilosula	HQ704498.1	Yoo75340	Lobelia columnaris	MF061188.1	isolate Pz3103	Lobelia bequaertii	MF061182.1		Campanula acarnanica	KF957752.1	isolate Cs1	Campanula apennina	KJ512558.1		Grammatotheca bergiana	MF770632.1		Burmeistera lutosa	KY045486.1	Muchhala 133	Centropogon valeri	GQ429140.1	LA8268	Burmeistera holm-nielsenii	EF174647.1	Muchhala 134	Campanula balansae	LT673992.1	isolate CAM320	Centropogon ferrugineus	KP014919.1	isolate LL33	Codonopsis lanceolata	MH018574.1		Campanula cana	LT706696.1	isolate CAM633	Asyneuma trichocalycinum	GQ254926.1	isolate 1659	Cyphia belfastica	MF770623.1
Burmeistera parviflora	KY045484.1	Lagomarsino 53	Campanula crenulata	MK556049.1	BOP205087	Codonopsis pilosula subsp. handeliana	KP318270.1	S13-6799	Lobelia davidii	NC_035372.1		Lobelia boninensis	KY354217.1		Campanula afganica	KM042121.1	A19040	Campanula aristata	KT970193.1		Hanabusaya asiatica	KJ477692.1	Yoo86859	Burmeistera oyacachensis	KY045485.1	Muchhala 171	Clermontia arborescens	DQ272695.1		Burmeistera loejtnantii	KY045487.1	F 2190436	Campanula balfourii	LT673989.1	isolate CAM287	Centropogon gamosepalus	KP014823.1	isolate LL66	Codonopsis minima	NC_036311.1		Campanula candida	LT706691.1	isolate CAM583	Azorina vidalii	KJ910657.1	A21000	Cyphia bulbosa var. bulbosa	MF770624.1
Burmeistera pirrensis	KY045483.1	Muchhala 491	Campanula creutzburgii	KT753222.1	isolate AC52	Codonopsis pilosula subsp. tangshen	KP318271.1	NY186	Lobelia deckenii subsp. deckenii	MF061190.1		Lobelia burttii subsp. burttii	MF061183.1		Campanula aizoides	MK651983.1	isolate BOP222176	Campanula armena	KJ689366.1	47142.2-IRAN	Hippobroma longiflora	MF061173.1		Burmeistera parviflora	KY045484.1	Lagomarsino 53	Clermontia arborescens subsp. waihiae	JX500345.1		Burmeistera lutosa	KY045486.1	Muchhala 133	Campanula barbata	LT673921.1	isolate CAM052	Centropogon glabrifilis	KP014916.1	isolate 41	Codonopsis ovata	KP318161.1	US1609608	Campanula carnica	LT706651.1	isolate CAM299	Brighamia insignis	DQ285139.1		Cyphia crenata	NC_036089.1
Burmeistera refracta	EF174653.1	Muchhala 110	Campanula dasyantha	EF213346.1	SS-05-169	Codonopsis subsimplex	KP318274.1	US3124878	Lobelia deckenii subsp. incipiens	MF061191.1		Lobelia burttii subsp. meruensis	MF061184.1		Campanula alaskana	MG217487.1	CCDB-22993-G03	Campanula arvatica	EU713344.1	NCC 94003 (EGHB)	Hypsela tridens	MF061174.1		Burmeistera pirrensis	KY045483.1	Muchhala 491	Clermontia calophylla	JX845891.1	isolate C151	Burmeistera multiflora	EF174637.1	Raguso s.n. 1	Campanula bayerniana	LT674026.1	isolate CAM522	Centropogon gloriosus	KP014979.1	isolate LL84	Codonopsis pilosula	KP318180.1	KWNU89892	Campanula carpatha	LT706715.1	isolate CAM888	Brighamia rockii	DQ285140.1		Cyphia dentariifolia	NC_036090.1
Burmeistera resupinata	KY045482.1	Muchhala 223	Campanula delicatula	KT753228.1	isolate AC408	Codonopsis tubulosa	KP318275.1	US3042833	Lobelia doniana	NC_035373.1		Lobelia burttii subsp. telmaticola	MF061185.1		Campanula alata	EU177775.1	Reverchon 135 €	Campanula aucheri	EU713241.1	Eddie 95010 (EGHB)	Isotoma tridens	NC_035362.1		Burmeistera resupinata	KY045482.1	Muchhala 223	Clermontia clermontioides subsp. clermontioides	JX845892.1	isolate C152	Burmeistera oyacachensis	EF174651.1	Muchhala 171	Campanula aucheri	LT673976.1	isolate CAM217	Centropogon grandidentatus	KU670688.1	isolate LL47	Codonopsis pilosula subsp. handeliana	KP318162.1	S13-6799	Campanula carpatica	LT706635.1	isolate CAM218	Burmeistera auriculata	KY045495.1	Muchhala 120	Cyphia elata var. gerrardii	MF770627.1
Burmeistera resupinata subsp. resupinata	EF174660.1	Muchhala 223	Campanula divaricata	MK555992.1	BOP104515	Codonopsis ussuriensis	KP318276.1	JE738	Lobelia erinus	NC_036098.1		Lobelia cardinalis	NC_036097.1		Campanula alpina	DQ304573.1		Campanula aurita	JN571944.1	UAM:Herb:15100	Lithotoma petraea	NC_033365.1		Burmeistera rubrosepala	KY045481.1	Muchhala 220	Clermontia drepanomorpha	JX845899.1	isolate C200	Burmeistera parviflora	KY045484.1	Lagomarsino 53	Campanula bellidifolia subsp. saxifraga	LT673933.1	isolate CAM093	Centropogon granulosus	KP014821.1	isolate 50	Codonopsis pilosula subsp. tangshen	KP318163.1	NY186	Campanula cashmeriana	LT706636.1	isolate CAM219	Burmeistera borjensis	KY045494.1	Muchhala 154	Cyphia glandulifera	MF770628.1
Burmeistera rubrosepala	KY045481.1	Muchhala 220	Campanula drabifolia	KT753234.1	isolate AC94	Cyanea fissa	KY354213.1		Lobelia fervens subsp. fervens	MF770602.1		Lobelia chinensis	NC_035370.1		Campanula americana	MG218476.1	CCDB-22993-D03	Campanula barbata	KJ512559.1		Lobelia aberdarica	NC_035365.1		Burmeistera smaragdi	KY045480.1	Muchhala 205	Clermontia fauriei	NC_035355.1		Burmeistera pirrensis	KY045483.1	Muchhala 491	Campanula betonicifolia	LT673996.1	isolate CAM321	Centropogon granulosus subsp. granulosus	KU670682.1	isolate 48	Codonopsis subscaposa	KP318165.1	S13-6826	Campanula caucasica	LT706683.1	isolate CAM529	Burmeistera ceratocarpa	KY045493.1	Muchhala 177	Cyphia phyteuma	MF770629.1
Burmeistera smaragdi	KY045480.1	Muchhala 205	Campanula erinus	KT753219.1	isolate AC88	Cyclocodon lancifolius	KP318278.1	HUH359222	Lobelia galpinii	NC_036071.1		Lobelia columnaris	MF061188.1	isolate Pz3103	Campanula aparinoides	MG217690.1	RBG-Blitz 032	Campanula bellidifolia	EU713240.1	Gaskin 115 (MO)	Lobelia acrochila	NC_035366.1		Burmeistera sodiroana	KY045479.1	Muchhala 115	Clermontia grandiflora subsp. grandiflora	JX845886.1	isolate C32	Burmeistera refracta	EF174653.1	Muchhala 110	Campanula betulifolia	LT673937.1	isolate CAM102	Centropogon gutierrezii	KP014950.1	isolate LL19	Codonopsis subsimplex	KP318166.1	US3124878	Campanula cecilii	LT706692.1	isolate CAM584	Burmeistera crispiloba	KY045492.1	Muchhala 123	Cyphia schlechteri	MF770630.1
Burmeistera sodiroana	EF174644.1	Muchhala 172	Campanula expansa	MK556039.1	BOP205692	Cyphia angustiloba	MF770621.1		Lobelia gibberoa	NC_035374.1		Lobelia davidii	NC_035372.1		Campanula aristata	MK651991.1	isolate BOP104461	Campanula bertolae	KJ512560.1		Lobelia anceps	NC_033366.1		Campanula acutiloba	JX914841.1	isolate CAM318	Clermontia kakeana	JX845896.1	isolate C190	Burmeistera resupinata	KY045482.1	Muchhala 223	Campanula bononiensis	LT673963.1	isolate CAM191	Centropogon hirtus	KU670680.1	isolate LL247	Codonopsis tubulosa	KP318177.1	KWNU89893	Campanula celsii	LT706638.1	isolate CAM226	Burmeistera cyclostigmata	DQ356213.1		Cyphia tortilis	MF770631.1
Burmeistera sp.	EF174632.1	Muchhala 142	Campanula garganica	EF213347.1	SRD-485	Cyphia banksiana	MF770622.1		Lobelia gregoriana subsp. elgonensis	MF061194.1		Lobelia deckenii subsp. deckenii	MF061190.1		Campanula armena	JX987510.1	47142.2-IRAN	Campanula betulifolia	KJ689367.1	G00303331	Lobelia bambuseti	MF061181.1		Campanula aff. annae	FN396982.1	CAM095 isolate CAM095	Clermontia kohalae	JX845884.1	isolate C5	Burmeistera resupinata subsp. resupinata	EF174660.1	Muchhala 223	Campanula buseri	LT674045.1	isolate CAM660	Centropogon incanus	KP014998.1	isolate LL49	Codonopsis ussuriensis	KP318168.1	JE738	Campanula cervicaria	LT706575.1	isolate CAM037	Burmeistera domingensis	DQ356214.1		Delissea rhytidosperma	KY354214.1
Burmeistera succulenta	EF174663.1	Muchhala 119	Campanula glomerata	MK556022.1	BOP104676	Cyphia belfastica	MF770623.1		Lobelia gregoriana subsp. gregoriana	MF061195.1		Lobelia deckenii subsp. incipiens	MF061191.1		Campanula asperuloides	MK651986.1	isolate BOP222179	Campanula bononiensis	EU713274.1	Cosner 1003 (OS)	Lobelia baumannii	MF770633.1		Campanula aff. bononiensis	FN396983.1	CAM038 isolate CAM038	Clermontia lindseyana	JX845900.1	isolate C201	Burmeistera rubrosepala	EF174648.1	Muchhala 220	Campanula californica	LT674083.1	isolate CAM312	Centropogon isabellinus	KP014982.1	isolate LL191	Codonopsis viridiflora	KP318169.1	S9H-3588	Campanula ciliata	LT706710.1	isolate CAM776	Burmeistera loejtnantii	KY045487.1	F 2190436	Delissea subcordata	DQ285186.1
Burmeistera truncata	EF174649.1	Muchhala 201	Campanula glomerata var. dahurica	HQ704474.1	Kim425	Cyphia bulbosa var. bulbosa	MF770624.1		Lobelia gregoriana subsp. sattimae	KY354218.1		Lobelia doniana	NC_035373.1		Campanula aurita	JN571991.1	UAM:Herb:147721	Campanula bravensis	KY091425.1	LISC:537	Lobelia bequaertii	MF061182.1		Campanula aff. linifolia	FN396984.1	CAM054 isolate CAM054	Clermontia micrantha	JX845887.1	isolate C46	Burmeistera smaragdi	KY045480.1	Muchhala 205	Campanula camptoclada	LT673971.1	isolate CAM207	Centropogon leucocarpus	KP014951.1	isolate LL127	Cyanea fissa	KY354213.1		Campanula cochleariifolia	LT706626.1	isolate CAM199	Burmeistera lutosa	KY045486.1	Muchhala 133	Dialypetalum floribundum	MF061169.1
Campanula aizoides	EU437662.1		Campanula grossekii	MK555994.1	BOP104549	Cyphia crenata	NC_036089.1		Lobelia hartlaubii	NC_036072.1		Lobelia erinus	NC_036098.1		Campanula austroadriatica	KC181028.1	isolate #146	Campanula caespitosa	KJ512567.1		Lobelia boninensis	KY354217.1		Campanula aff. rotundifolia	FN396986.1	CAM086 isolate CAM086	Clermontia montis-loa	JX845893.1	isolate C157	Burmeistera sodiroana	EF174642.1	Muchhala 129	Campanula cana	LT674040.1	isolate CAM633	Centropogon llanganatensis	KP014926.1	isolate LL67	Cyanea leptostegia	MF061168.1		Campanula collina	LT706595.1	isolate CAM096	Burmeistera oyacachensis	KY045485.1	Muchhala 171	Diastatea micrantha	MF061170.1
Campanula alliariifolia	EU437604.1		Campanula hawkinsiana	EF213348.1	SS-04-08	Cyphia dentariifolia	NC_036090.1		Lobelia heterophylla subsp. heterophylla	MF770605.1		Lobelia fervens subsp. fervens	MF770602.1		Campanula balfourii	KM042122.1	A16184	Campanula cana	KU375232.1		Lobelia burttii subsp. burttii	MF061183.1		Campanula afganica	KJ910719.1	A19040	Clermontia oblongifolia subsp. oblongifolia	JX845895.1	isolate C189	Burmeistera sp.	EF174632.1	Muchhala 142	Campanula candida	LT674035.1	isolate CAM583	Centropogon luteus	KP014922.1	isolate 52	Cyclocodon lancifolius	KP318170.1	HUH359222	Campanula colorata	LT706699.1	isolate CAM645	Burmeistera pirrensis	KY045483.1	Muchhala 491	Downingia cuspidata	MF061171.1
Campanula alpestris	KJ512512.1		Campanula immodesta	MK556056.1	BOP205092	Cyphia elata var. gerrardii	MF770627.1		Lobelia holstii	NC_036073.1		Lobelia galpinii	NC_036071.1		Campanula baumgartenii	KY009354.1	isolate CNO5	Campanula carnica	KJ512568.1		Lobelia burttii subsp. meruensis	MF061184.1		Campanula afra	JX914970.1	isolate CAM491	Clermontia parviflora	JX845885.1	isolate C11	Burmeistera succulenta	EF174662.1	Muchhala 214	Campanula carnica	LT673994.1	isolate CAM299	Centropogon luteynii	KP014911.1	isolate LL125	Cyphia angustiloba	MF770621.1		Campanula conferta	LT706654.1	isolate CAM325	Burmeistera resupinata	KY045482.1	Muchhala 223	Downingia elegans	MF061172.1
Campanula apennina	KJ512513.1		Campanula incanescens	MK555995.1	BOP104554	Cyphia glandulifera	MF770628.1		Lobelia inflata	NC_033368.1		Lobelia gibberoa	NC_035374.1		Campanula beckiana	DQ304619.1		Campanula carpatha	EU713261.1	M. Avramakis s.n. (NHMC)	Lobelia burttii subsp. telmaticola	MF061185.1		Campanula aizoides	JX915202.1	isolate NC3330	Clermontia peleana	JX845897.1	isolate C193	Burmeistera truncata	EF174649.1	Muchhala 201	Campanula carpatha	LT674059.1	isolate CAM888	Centropogon macbridei	KP014917.1	isolate LL165	Cyphia banksiana	MF770622.1		Campanula crenulata	LT706716.1	isolate CAM644	Burmeistera rubrosepala	KY045481.1	Muchhala 220	Echinocodon lobophyllus	MH029157.1
Campanula aristata	KT970121.1		Campanula incurva	MK555996.1	BOP104555	Cyphia phyteuma	MF770629.1		Lobelia jasionoides	NC_033369.1		Lobelia gregoriana subsp. elgonensis	MF061194.1		Campanula bellardii	MK651992.1	isolate BOP104464	Campanula carpatica	EU713303.1	Gaskin 121 (MO)	Lobelia cardinalis	NC_036097.1		Campanula aizoon	JX914926.1	isolate CAM407	Clermontia singuliflora	JX845898.1	isolate C195	Burmeistera variabilis	KU670751.1	isolate LL211	Campanula carpatica	LT673977.1	isolate CAM218	Centropogon macrophyllus	KP014824.1	isolate LL169	Cyphia belfastica	MF770623.1		Campanula creutzburgii	LT706639.1	isolate CAM227	Burmeistera smaragdi	KY045480.1	Muchhala 205	Grammatotheca bergiana	MF770632.1
Campanula armena	KJ689350.1	47142.2-IRAN	Campanula intercedens	MK555997.1	BOP104556	Cyphia schlechteri	MF770630.1		Lobelia kauaensis	MF061196.1		Lobelia gregoriana subsp. gregoriana	MF061195.1		Campanula bertolae	MK651993.1	isolate BOP104466	Campanula cenisia	KJ512570.1		Lobelia chinensis	NC_035370.1		Campanula akguelii	JX915050.1	isolate CAM581	Clermontia tuberculata	JX845888.1	isolate C68	Burmeistera zurquiensis	KU670805.1	isolate LL38	Campanula cashmeriana	LT673978.1	isolate CAM219	Centropogon magnificus	KP014995.1	isolate LL107	Cyphia bulbosa var. bulbosa	MF770624.1		Campanula crispa	LT706656.1	isolate CAM328	Burmeistera sodiroana	KY045479.1	Muchhala 115	Hanabusaya asiatica	KJ477692.1
Campanula arvatica	EU437677.1		Campanula kastellorizana	KT753240.1	isolate AC7	Cyphia tortilis	MF770631.1		Lobelia laxa	NC_036074.1		Lobelia gregoriana subsp. sattimae	KY354218.1		Campanula betulifolia	JX987512.1	G00303331	Campanula cf.	KJ512590.1	spatulata AAC-2014	Lobelia columnaris	MF061188.1	isolate Pz3103	Campanula alaskana	JX914830.1	isolate CAM306	Clermontia waimeae	JX845889.1	isolate C109	Campanula abietina	MK555336.1	BOP104445	Campanula caucasica	LT674027.1	isolate CAM529	Centropogon mandonis	KP014977.1	isolate LL86	Cyphia crenata	NC_036089.1		Campanula cymaea	LT706668.1	isolate CAM411	Campanula abietina	EF088697.1	isolate CR5	Hippobroma longiflora	MF061173.1
Campanula aucheri	EU437576.1		Campanula lanceolata	MK556042.1	BOP205700	Delissea rhytidosperma	KY354214.1		Lobelia laxiflora	NC_033370.1		Lobelia hartlaubii	NC_036072.1		Campanula bononiensis	DQ304571.1		Campanula cochleariifolia	JN571946.1	RBGE2037	Lobelia davidii	NC_035372.1		Campanula alliariifolia	FN396987.1	isolate CAM049	Codonopsis alpina	KY070784.1	isolate BOP018424-1	Campanula affinis	FJ587240.1		Campanula cecilii	LT674051.1	isolate CAM749	Centropogon medusa	KP014930.1	isolate LL68	Cyphia dentariifolia	NC_036090.1		Campanula cymbalaria	LT706619.1	isolate CAM183	Campanula acarnanica	KF957744.1	isolate Ct7	Hypsela tridens	MF061174.1
Campanula aurita	JN571924.1	UAM:Herb:15100	Campanula latifolia	MK555999.1	BOP104572	Dialypetalum floribundum	MF061169.1		Lobelia linearis	NC_036075.1		Lobelia heterophylla subsp. heterophylla	MF770605.1		Campanula bordesiana	KM042124.1	A9833	Campanula cretica	EU713330.1	Edwards 50 (YU)	Lobelia deckenii subsp. deckenii	MF061190.1		Campanula alpestris	JX915201.1	isolate NC3329	Codonopsis argentea	KM675835.1	627	Campanula aizoides	EU713436.1		Campanula celsii	LT673980.1	isolate CAM226	Centropogon minimus	KP014947.1	isolate LL203	Cyphia elata var. gerrardii	MF770627.1		Campanula damascena	LT706618.1	isolate CAM182	Campanula affinis	EF088698.1	isolate CR6	Isotoma axillaris	DQ285205.1
Campanula barbata	KJ512514.1		Campanula lezgina	MK556028.1	BOP104969	Diastatea micrantha	MF061170.1		Lobelia longisepala	NC_033371.1		Lobelia holstii	NC_036073.1		Campanula bravensis	KY091380.1	LISC:762	Campanula creutzburgii	EU713290.1	Cellinese 1003 (YU)	Lobelia deckenii subsp. incipiens	MF061191.1		Campanula alpina	JX914819.1	isolate CAM294	Codonopsis benthamii	KY070774.1	isolate BOP018420-1	Campanula alaskana	MG221278.1	CCDB-22993-G03	Campanula cervicaria	LT673929.1	isolate CAM078	Centropogon nervosus	KP014915.1	isolate LL193	Cyphia glandulifera	MF770628.1		Campanula darialica	LT706596.1	isolate CAM098	Campanula afganica	KJ910659.1	A19040	Isotoma hypocrateriformis	MF061176.1
Campanula bellidifolia	EU437575.1		Campanula lingulata	MK556000.1	BOP104576	Echinocodon lobophyllus	MH029157.1		Lobelia lukwangulensis	NC_035376.1		Lobelia inflata	NC_033368.1		Campanula broussonetiana	FM212714.1	isolate CB04ITS	Campanula dasyantha subsp. chamissonis	JN571945.1	UAM:Herb:88782	Lobelia doniana	NC_035373.1		Campanula alsinoides	JX914969.1	isolate CAM490	Codonopsis bhutanica	KY070756.1	isolate BOP018008-2	Campanula alliariifolia	EU713376.1		Campanula ciliata	LT673918.1	isolate CAM047	Centropogon nigricans	KY045478.1	Muchhala 118	Cyphia phyteuma	MF770629.1		Campanula davisii isolate	LT706633.1	CAM215	Campanula alliariifolia	EF088700.1	isolate CR8	Isotoma tridens	NC_035362.1
Campanula bertolae	KJ512515.1		Campanula longistyla	MK556014.1	BOP104651	Grammatotheca bergiana	MF770632.1		Lobelia malowensis	NC_036076.1		Lobelia jasionoides	NC_033369.1		Campanula cabezudoi	FM212730.1	isolate CC04ITS	Campanula divaricata	EU713343.1	Haberle 150 (TEX)	Lobelia dortmanna	DQ356109.1		Campanula americana	JX914734.1	isolate CAM195	Codonopsis bomiensis	KM675840.1	52	Campanula alpestris	KJ512612.1		Campanula cochleariifolia	LT673968.1	isolate CAM199	Centropogon palmanus	KP014843.1	isolate LL35	Cyphia schlechteri	MF770630.1		Campanula delicatula	LT706657.1	isolate CAM331	Campanula alpestris	EF213141.1	SS-05-167	Legenere valdiviana	NC_035364.1
Campanula betulifolia	KJ689351.1	G00303331	Campanula lycica	KT753241.1	isolate AC10	Hanabusaya asiatica	HQ704500.1	Yoo75337	Lobelia melliana	NC_035377.1		Lobelia kauaensis	MF061196.1		Campanula caespitosa	MK651995.1	isolate BOP104473	Campanula drabifolia	KJ512556.1		Lobelia erinus	NC_036098.1		Campanula anchusiflora	JX914912.1	isolate CAM392	Codonopsis bulleyana	KY070745.1	isolate BOP018026-2	Campanula alpina	KJ414428.1	isolate 845p1C	Campanula collina	LT673935.1	isolate CAM096	Centropogon panamensis	KP014828.1	isolate LL129	Cyphia tortilis	MF770631.1		Campanula dolomitica	LT706570.1	isolate CAM535	Campanula americana	KP054009.1	haplotype J	Lithotoma petraea	NC_033365.1
Campanula bononiensis	EU437609.1		Campanula macrostachya	MK556001.1	BOP104581	Himalacodon dicentrifolius	KP318264.1	G308447	Lobelia mildbraedii	NC_035378.1		Lobelia laxa	NC_036074.1		Campanula calcicola	MK652078.1	isolate BOP162108	Campanula edulis	EU713267.1	S. Collenette 8782 (TEX)	Lobelia exaltata	DQ356093.1		Campanula andina	JX914991.1	isolate CAM519	Codonopsis canescens	KY070782.1	isolate BOP018183-2	Campanula alpina subsp. orbelica	KJ414442.1	isolate 3635p1C	Campanula colorata	LT674043.1	isolate CAM645	Centropogon perlongus	KP014989.1	isolate LL194	Delissea rhytidosperma	KY354214.1		Campanula drabifolia	LT706676.1	isolate CAM385	Campanula andrewsii	EF088701.1	isolate CR9	Lobelia aberdarica	NC_035365.1
Campanula caespitosa	KJ512518.1		Campanula medium	MK556002.1	BOP104583	Hippobroma longiflora	MF061173.1		Lobelia morogoroensis	NC_033372.1		Lobelia laxiflora	NC_033370.1		Campanula cana	MK651996.1	isolate BOP104479	Campanula elatines	EU713331.1	Ayers 88-287 (BH)	Lobelia fervens subsp. fervens	MF770602.1		Campanula andrewsii	JX914733.1	isolate CAM194	Codonopsis cardiophylla	KM675843.1	5640	Campanulastrum americanum	EU643729.1		Campanula conferta	LT673997.1	isolate CAM325	Centropogon peruvianus	KU670683.1	isolate LL246	Dialypetalum floribundum	MF061169.1		Campanula edulis	LT706586.1	isolate CAM062	Campanula aparinoides	EF088702.1	isolate CR10	Lobelia acrochila	NC_035366.1
Campanula cana	KT970122.1		Campanula moesiaca	MK556003.1	BOP104589	Hypsela tridens	MF061174.1		Lobelia muscoides	MF061201.1		Lobelia linearis	NC_036075.1		Campanula carnica	MK652015.1	isolate BOP104560	Campanula elatinoides	KJ512572.1		Lobelia galpinii	NC_036071.1		Campanula andrewsii subsp. hirsutula	JX915183.1	isolate NC3210	Codonopsis chlorocodon	KY070765.1	isolate BOP018184-1	Campanula americana	MG222563.1	CCDB-22993-C03	Campanula crenulata	LT674060.1	isolate CAM644	Centropogon preslii	KP014929.1	isolate 57	Diastatea micrantha	MF061170.1		Campanula ekimiana	LT706734.1	isolate CAM334	Campanula argaea	EF088703.1	isolate CR11	Lobelia anceps	NC_033366.1
Campanula carnica	KJ512519.1		Campanula orphanidea	MK556004.1	BOP104592	Isotoma hypocrateriformis	MF061176.1	isolate K5274	Lobelia niihauensis	NC_035380.1		Lobelia longisepala	NC_033371.1		Campanula carpatica	MK651997.1	isolate BOP104484	Campanula erinus	KY091402.1	AZB:CE-PSRS-001	Lobelia gibberoa	NC_035374.1		Campanula angustiflora	JX915223.1	isolate NC3377	Codonopsis clematidea	KM675845.1	BOP018200	Campanula aparinoides	EU643728.1		Campanula creutzburgii	LT673981.1	isolate CAM227	Centropogon pulcher	KP014842.1	isolate LL168	Downingia cuspidata	MF061171.1		Campanula elatinoides	LT706584.1	isolate CAM057	Campanula aristata	KU375241.1		Lobelia bambuseti	MF061181.1
Campanula carpatha	EU437596.1		Campanula pallida	MK556005.1	BOP104593	Isotoma tridens	NC_035362.1		Lobelia organensis	NC_035382.1		Lobelia lukwangulensis	NC_035376.1		Campanula cenisia	DQ304622.1		Campanula excisa	KJ512573.1		Lobelia gregoriana subsp. elgonensis	MF061194.1		Campanula aparinoides	JX914828.1	isolate CAM303	Codonopsis convolvulacea	KY070840.1	isolate BOP018050-2	Campanula apennina	KJ512613.1		Campanula crispa	LT673999.1	isolate CAM328	Centropogon reticulatus	KP014921.1	isolate LL54	Downingia elegans	MF061172.1		Campanula erinus	LT706677.1	isolate CAM391	Campanula armena	EF088704.1	isolate CR12	Lobelia baumannii	MF770633.1
Campanula carpatica	KJ512511.1		Campanula parryi	EF213349.1	no	Lithotoma petraea	NC_033365.1		Lobelia patula	NC_036077.1		Lobelia malowensis	NC_036076.1		Campanula cephallenica	DQ304597.1		Campanula exigua	EU713309.1	Haberle 148 (TEX)	Lobelia gregoriana subsp. gregoriana	MF061195.1		Campanula apennina	KJ512597.1	isolate Seq1	Codonopsis convolvulacea subsp. forrestii	KY070838.1	isolate BOP018054	Campanula aristata	KT970156.1		Campanula cymaea	LT674012.1	isolate CAM411	Centropogon rex	KP014972.1	isolate LL207	Echinocodon lobophyllus	MH029157.1		Campanula euboica	LT706670.1	isolate CAM414	Campanula arvatica	JF747591.1		Lobelia bequaertii	MF061182.1
Campanula cenisia	KJ512521.1		Campanula patula	EF213350.1	SS-05-174	Lobelia aberdarica	NC_035365.1		Lobelia petiolata	NC_035383.1		Lobelia melliana	NC_035377.1		Campanula cervicaria	MK651999.1	isolate BOP104490	Campanula floridana	KJ772602.1		Lobelia gregoriana subsp. sattimae	KY354218.1		Campanula aprica	JX915087.1	isolate CAM633	Codonopsis convolvulacea subsp. grey-wilsonii	KY070817.1	isolate BOP018004-1	Campanula armena	KJ689358.1	47142.2-IRAN	Campanula cymbalaria	LT673961.1	isolate CAM183	Centropogon roseus	KP014827.1	isolate LL216	Grammatotheca bergiana	MF770632.1		Campanula evolvulacea	LT706632.1	isolate CAM214	Campanula asperuloides	DQ356170.1		Lobelia boninensis	DQ285196.1
Campanula cervicaria	KJ512522.1		Campanula pendula	MK556029.1	BOP104970	Lobelia acrochila	NC_035366.1		Lobelia physaloides	MF770620.1		Lobelia mildbraedii	NC_035378.1		Campanula cespitosa	DQ304621.1		Campanula foliosa	KJ512574.1		Lobelia hartlaubii	NC_036072.1		Campanula ardonensis	JX914993.1	isolate CAM521	Codonopsis convolvulacea subsp. vinciflora	KY070854.1	isolate BOP018039	Campanula arvatica	EU713451.1		Campanula damascena	LT673960.1	isolate CAM182	Centropogon salviiformis	KP014932.1	isolate LL70	Hanabusaya asiatica	HQ704617.1	Yoo75337	Campanula exigua	LT706730.1	isolate CAM313	Campanula aurita	JN571999.1	UAM:Herb:15100	Lobelia burttii subsp. burttii	MF061183.1
Campanula cf. carnica	KJ512520.1	AAC-2014	Campanula persicifolia	EF213351.1	SS-05-171	Lobelia anceps	NC_033366.1		Lobelia polyphylla	KY354224.1		Lobelia morogoroensis	NC_033372.1		Campanula chinensis	MK652081.1	isolate BOP205686	Campanula forsythii	KJ512575.1		Lobelia heterophylla subsp. heterophylla	MF770605.1		Campanula argaea	JX914732.1	isolate CAM193	Codonopsis convolvulacea var. efilamentosa	KY070845.1	isolate BOP018051-3	Campanula asperuloides	DQ356117.1		Campanula darialica	LT673936.1	isolate CAM098	Centropogon simulans	KU670684.1	isolate LL248	Himalacodon dicentrifolius	KP318156.1	G308447	Campanula fastigiata	LT706724.1	isolate CAM258	Campanula autraniana	GQ254908.1	isolate 1262	Lobelia burttii subsp. meruensis	MF061184.1
Campanula cf. spatulata	KJ512549.1	AAC-2014	Campanula petiolata	MK556043.1	BOP205706	Lobelia bambuseti	MF061181.1		Lobelia puberula	MF770611.1		Lobelia muscoides	MF061201.1		Campanula chrysosplenifolia	MK652000.1	isolate BOP104497	Campanula fragilis	EU713321.1	Eddie 98014 (EGHB)	Lobelia holstii	NC_036073.1		Campanula argentea	JX914944.1	isolate CAM434	Codonopsis cordifolioidea	KM675846.1	21121	Campanula aurita	JN571965.1	UAM:Herb:15100	Campanula davisii	LT673975.1	isolate CAM215	Centropogon smithii	KP015008.1	isolate LL6	Hippobroma longiflora	MF061173.1		Campanula fedorovii	LT706578.1	isolate CAM046	Campanula baborensis	KJ910660.1	A19020	Lobelia burttii subsp. telmaticola	MF061185.1
Campanula cochleariifolia	JN571926.1	RBGE2037	Campanula pinatzii	KT753246.1	isolate AC83	Lobelia baumannii	MF770633.1		Lobelia rhynchopetalum	NC_035384.1		Lobelia niihauensis	NC_035380.1		Campanula circassica	MK652001.1	isolate BOP104498	Campanula glomerata	MF158666.1		Lobelia inflata	NC_033368.1		Campanula ariana	JX914968.1	isolate CAM489	Codonopsis deltoidea	KY070761.1	isolate BOP018198-2	Campanula balfourii	FJ587243.1		Campanula delicatula	LT674000.1	isolate CAM331	Centropogon sodiroanus	KP015011.1	isolate LL72	Hypsela tridens	MF061174.1		Campanula fenestrellata	LT706631.1	isolate CAM213	Campanula balfourii	EF088705.1	isolate CR13	Lobelia cardinalis	DQ285207.1
Campanula cretica	EU437663.1		Campanula podocarpa	KT753250.1	isolate AC90	Lobelia bequaertii	MF061182.1		Lobelia ritabeaniana	NC_035385.1		Lobelia organensis	NC_035382.1		Campanula cochleariifolia	KY009281.1	isolate CGT4	Campanula glomerata var. dahurica	KC146481.1	Yoo75359	Lobelia jasionoides	NC_033369.1		Campanula aristata	JX914760.1	isolate CAM223	Codonopsis farreri	KY070769.1	isolate BOP018416	Campanula barbata	KF602096.1		Campanula dolomitica	LT673908.1	isolate CAM535	Centropogon solanifolius	KP014834.1	isolate 59	Isotoma hypocrateriformis	MF061176.1	isolate K5274	Campanula filicaulis	LT706679.1	isolate CAM279	Campanula bellidifolia	EF088706.1	isolate CR14	Lobelia chinensis	NC_035370.1
Campanula creutzburgii	EU437625.1		Campanula portenschlagiana	MK556044.1	BOP205707	Lobelia boninensis	KY354217.1		Lobelia sancta	NC_035386.1		Lobelia patula	NC_036077.1		Campanula comosiformis	KF957754.1	isolate Cs3	Campanula grossheimii	EU713286.1	Gaskin 206 (MO)	Lobelia kauaensis	MF061196.1		Campanula armazica	FN396988.1	isolate CAM031	Codonopsis foetens	KY070738.1	isolate BOP018005-1	Campanula aucheri	EU713348.1		Campanula drabifolia	LT674020.1	isolate CAM385	Centropogon sp.	KP014987.1	Lagomarsino 354 isolate LL176	Isotoma tridens	NC_035362.1		Campanula foliosa	LT706617.1	isolate CAM180	Campanula bertolae	MK556533.1	BOP104466	Lobelia columnaris	DQ285197.1
Campanula dasyantha subsp. chamissonis	JN571925.1	UAM:Herb:88782	Campanula prenanthoides	MK556045.1	BOP205709	Lobelia burttii subsp. burttii	MF061183.1		Lobelia seguinii	NC_035387.1		Lobelia petiolata	NC_035383.1		Campanula crassipes	MK652003.1	isolate BOP104504	Campanula hawkinsiana	EU713338.1	Eddie 94002 (EGHB)	Lobelia laxa	NC_036074.1		Campanula armena	JX915049.1	isolate CAM580	Codonopsis foetens subsp. nervosa	KY070749.1	isolate BOP018172-2	Campanula bellidifolia subsp. saxifraga	FJ587274.1		Campanula edulis	LT673926.1	isolate CAM062	Centropogon subandinus	KP014913.1	isolate LL71	Legenere valdiviana	NC_035364.1		Campanula formanekiana	LT706616.1	isolate CAM179	Campanula betulifolia	EF213142.1	SS-04-09	Lobelia davidii	NC_035372.1
Campanula divaricata	EU437676.1		Campanula punctata	KU198434.1		Lobelia burttii subsp. meruensis	MF061184.1		Lobelia sessilifolia	NC_035388.1		Lobelia physaloides	MF770620.1		Campanula creutzburgii	KM042125.1	Alpinar s. n. (ISTE)	Campanula herminii	EU713340.1	Neves 227 (TEX)	Lobelia laxiflora	NC_033370.1		Campanula arvatica	JX914967.1	isolate CAM488	Codonopsis gongshanica	KM675819.1	BOP018421(A)	Campanula bertolae	KJ512617.1	isolate 3	Campanula ekimiana	LT674090.1	isolate CAM334	Centropogon talamancensis	KP014953.1	isolate LL27	Lithotoma petraea	NC_033365.1		Campanula garganica	LT706630.1	isolate CAM211	Campanula bordesiana	KJ910662.1	A9856	Lobelia deckenii subsp. deckenii	MF061190.1
Campanula drabifolia	KJ512524.1		Campanula radicosa	EF213352.1	Strid & Papanicolaou 15286	Lobelia burttii subsp. telmaticola	MF061185.1		Lobelia siphilitica var. siphilitica	KY354225.1		Lobelia polyphylla	KY354224.1		Campanula dasyantha subsp. chamissonis	JN571996.1	UAM:Herb:88782	Campanula hierapetrae	EU713288.1	Edwards 27 (YU)	Lobelia linearis	NC_036075.1		Campanula asperuloides	JX914915.1	isolate CAM395	Codonopsis handeliana	KM675857.1	BOP018055	Campanula betulifolia	KJ689359.1	G00303331	Campanula elatinoides	LT673924.1	isolate CAM057	Centropogon tessmannii	KP014882.1	isolate LL73	Lobelia aberdarica	NC_035365.1		Campanula gentilis	LT706741.1	isolate CAM883	Campanula caespitosa	KJ512655.1	isolate 2	Lobelia deckenii subsp. incipiens	MF061191.1
Campanula edulis	EU437602.1		Campanula radula	MK556007.1	BOP104624	Lobelia cardinalis	GQ247991.1	USBG 04-0230	Lobelia sonderiana	NC_036079.1		Lobelia puberula	MF770611.1		Campanula debarensis	DQ304595.1		Campanula hofmannii	KJ689368.1	H1679249	Lobelia longisepala	NC_033371.1		Campanula asperuloides subsp. taygetea	JX914919.1	isolate CAM399	Codonopsis hongii	KM675858.1	BOP018007	Campanula bononiensis	EU713381.1		Campanula erinus	LT674021.1	isolate CAM391	Centropogon trachyanthus	KP014838.1	isolate LL75	Lobelia acrochila	NC_035366.1		Campanula glomerata	LT706563.1	isolate CAM013	Campanula calcicola	MK556573.1	BOP205082	Lobelia doniana	NC_035373.1
Campanula elatines	EU437664.1		Campanula ramosissima	MK556008.1	BOP104627	Lobelia chinensis	NC_035370.1		Lobelia spicata	NC_036080.1		Lobelia rhynchopetalum	NC_035384.1		Campanula decumbens subsp. baetica	HQ407547.1	isolate CDB01	Campanula immodesta	KT970196.1		Lobelia lukwangulensis	NC_035376.1		Campanula aucheri	JX915114.1	isolate 6T	Codonopsis inflata	KY070805.1	isolate BOP018128-1	Campanula bravensis	KY091560.1	LISC:762	Campanula euboica	LT674014.1	isolate CAM414	Centropogon trichodes	KP014970.1	isolate 62	Lobelia anceps	NC_033366.1		Campanula goulimyi	LT706669.1	isolate CAM413	Campanula cana	KT970289.1		Lobelia erinus	NC_036098.1
Campanula elatinoides	KJ512525.1		Campanula rapunculoides	EF213354.1	SS-05-172	Lobelia columnaris	MF061188.1	isolate Pz3103	Lobelia stricklandiae	NC_033374.1		Lobelia ritabeaniana	NC_035385.1		Campanula dichotoma	DQ304579.1		Campanula jacobaea	KY091433.1	LISC:3219	Lobelia malowensis	NC_036076.1		Campanula aurita	JX915217.1	isolate NC3371	Codonopsis javanica	KM675862.1	258	Campanula caespitosa	KJ512624.1		Campanula evolvulacea	LT673974.1	isolate CAM214	Centropogon umbrosus	KP014825.1	isolate LL172	Lobelia bambuseti	MF061181.1		Campanula grandis	LT706771.1	isolate CAM338	Campanula carnica	KJ512670.1	isolate Seq16	Lobelia excelsa	DQ285198.1
Campanula erinus	EU437626.1		Campanula rapunculus	MK556046.1	BOP205714	Lobelia davidii	NC_035372.1		Lobelia stuhlmannii	NC_035389.1		Lobelia sancta	NC_035386.1		Campanula dieckii	FM212733.1	isolate CD07ITS	Campanula jacquinii	EU713341.1	Edwards 41 (YU)	Lobelia melliana	NC_035377.1		Campanula axillaris	JX914842.1	isolate CAM319	Codonopsis javanica subsp. japonica	KY070821.1	isolate BOP018015-3	Campanula cana	KT970157.1		Campanula exigua	LT674084.1	isolate CAM313	Centropogon unduavensis	KP014978.1	isolate LL108	Lobelia baumannii	MF770633.1		Campanula hagielia	LT706615.1	isolate CAM177	Campanula cashmeriana	KJ910663.1	A23057	Lobelia fervens subsp. fervens	MF770602.1
Campanula excisa	KJ512527.1		Campanula raveyi	KT753253.1	isolate AC422	Lobelia deckenii subsp. deckenii	MF061190.1		Lobelia telekii	NC_035390.1		Lobelia seguinii	NC_035387.1		Campanula dimorphantha	MK652004.1	isolate BOP104514	Campanula laciniata	EU713244.1	Cellinese 1004 (YU)	Lobelia mildbraedii	NC_035378.1		Campanula baborensis	KJ910720.1	A19020	Codonopsis kawakamii	KM675864.1	1162	Campanula carnica	KJ512625.1		Campanula fastigiata	LT674076.1	isolate CAM258	Centropogon urubambae	KP014831.1	isolate LL171	Lobelia bequaertii	MF061182.1		Campanula hawkinsiana	LT706717.1	isolate CAM420	Campanula cenisia	MK556534.1	BOP104485	Lobelia galpinii	NC_036071.1
Campanula exigua	EU437643.1		Campanula recta	MK556010.1	BOP104636	Lobelia deckenii subsp. incipiens	MF061191.1		Lobelia thapsoidea	NC_035391.1		Lobelia sessilifolia	NC_035388.1		Campanula divaricata	MK652005.1	isolate BOP104515	Campanula lactiflora	KJ512577.1		Lobelia morogoroensis	NC_033372.1		Campanula balansae	JX914843.1	isolate CAM320	Codonopsis lanceolata	KM675868.1	385	Campanula carpatha	EU713368.1		Campanula_fedorovii	LT673917.1	isolate CAM046	Centropogon valerioi	KP014924.1	isolate 63	Lobelia boninensis	KY354217.1		Campanula hierapetrae	LT706601.1	isolate CAM124	Campanula cephallenica	FJ426576.1		Lobelia gibberoa	NC_035374.1
Campanula foliosa	KJ512528.1		Campanula rhodensis	KT753254.1	isolate AC2	Lobelia doniana	NC_035373.1		Lobelia thermalis	NC_036081.1		Lobelia siphilitica var. siphilitica	KY354225.1		Campanula drabifolia	DQ304578.1		Campanula lanata	EU713275.1	Eddie 96051 (EGHB)	Lobelia muscoides	NC_035379.1		Campanula balfourii	JX914812.1	isolate CAM287	Codonopsis macrocalyx	KM675871.1	BOP018419	Campanula carpatica	EU713410.1		Campanula fenestrellata	LT673973.1	isolate CAM213	Centropogon vargasii	KU670681.1	isolate LL244	Lobelia burttii subsp. burttii	MF061183.1		Campanula hierosolymitana	LT706645.1	isolate CAM285	Campanula cervicaria	MK556535.1	BOP104486	Lobelia gloria-montis	DQ285187.1
Campanula forsythii	KJ512529.1		Campanula rhomboidalis	MK556011.1	BOP104638	Lobelia erinus	NC_036098.1		Lobelia thuliniana	NC_033375.1		Lobelia sonderiana	NC_036079.1		Campanula edulis	KM042135.1	A10386	Campanula lasiocarpa	JN571948.1	WWB22732	Lobelia niihauensis	NC_035380.1		Campanula barbata	JX914966.1	isolate CAM487	Codonopsis meleagris	KM675873.1	869-397	Campanula cenisia	KJ512627.1		Campanula filicaulis	LT674023.1	isolate CAM279	Centropogon viriduliflorus	KP015006.1	isolate LL180	Lobelia burttii subsp. meruensis	MF061184.1		Campanula hofmannii	LT706560.1	isolate CAM004	Campanula chamissonis	EF088709.1	isolate CR17	Lobelia gregoriana subsp. elgonensis	MF061194.1
Campanula fragilis	EU437655.1		Campanula rotundifolia	EF213355.1	SS-01-99	Lobelia fervens subsp. fervens	MF770602.1		Lobelia udzungwensis	NC_035392.1		Lobelia spicata	NC_036080.1		Campanula elatines	DQ304624.1		Campanula latifolia	EU713271.1	Gaskin 405 (MO)	Lobelia organensis	NC_035382.1		Campanula baumgartenii	FN396991.1	isolate CAM107	Codonopsis micrantha	KM675874.1	3939	Campanula cf. carnica	KJ512626.1	AAC-2014	Campanula foliosa	LT673959.1	isolate CAM180	Centropogon weberbaueri	KP014934.1	isolate LL157	Lobelia burttii subsp. telmaticola	MF061185.1		Campanula hohenackeri	LT706577.1	isolate CAM044	Campanula chinensis	MK556586.1	BOP205687	Lobelia gregoriana subsp. gregoriana	MF061195.1
Campanula glomerata	KJ512530.1		Campanula saxifraga	EF213357.1	SS-05-166	Lobelia galpinii	NC_036071.1		Lobelia urens	NC_035393.1		Lobelia stricklandiae	NC_033374.1		Campanula elatinoides	DQ304625.1		Campanula lusitanica	EU713334.1	Neves 226 (TEX)	Lobelia patula	NC_036077.1		Campanula bayerniana	JX914994.1	isolate CAM522	Codonopsis obtusa	KM675876.1	FPH0246	Campanula cf. spatulata	KJ512648.1	AAC-2014	Campanula formanekiana	LT673958.1	isolate CAM179	Centropogon yarumalensis	KP014918.1	isolate LL202	Lobelia cardinalis	NC_036097.1		Campanula humillima	LT706763.1	isolate CAM587	Campanula choruhensis	GQ254909.1	isolate 1260	Lobelia gregoriana subsp. sattimae	KY354218.1
Campanula glomerata var. dahurica	KC146461.1	Kim425	Campanula scheuchzeri	MK556013.1	BOP104650	Lobelia gibberoa	NC_035374.1		Lobelia wollastonii	NC_035394.1		Lobelia stuhlmannii	NC_035389.1		Campanula embergeri	KM042138.1	A9575	Campanula macrorhiza	KJ512578.1		Lobelia petiolata	NC_035383.1		Campanula bellidifolia	JX915115.1	isolate 7T	Codonopsis pilosula	GQ435065.1	PS0581MT01	Campanula chamissonis	EU643724.1		Campanula_garganica	LT673972.1	isolate CAM211	Centropogon yungasensis	KP014835.1	isolate LL109	Lobelia chinensis	NC_035370.1		Campanula iconia	LT706773.1	isolate CAM340	Campanula cochleariifolia	MK556536.1	BOP104500	Lobelia hartlaubii	NC_036072.1
Campanula grossheimii	EU437621.1		Campanula sclerotricha	MK556012.1	BOP104647	Lobelia gregoriana subsp. elgonensis	MF061194.1		Lobelia yuccoides	MF061221.1		Lobelia telekii	NC_035390.1		Campanula erinus	KY091355.1	AZB:CE-PSRS-001	Campanula macrostachya	KJ512579.1		Lobelia physaloides	MF770620.1		Campanula bellidifolia subsp. argunensis	JX914996.1	isolate CAM524	Codonopsis pilosula subsp. tangshen	MF096994.1	isolate KMS0056A01	Campanula cochleariifolia	KF602118.1		Campanula gentilis	LT674105.1	isolate CAM883	Centropogon zamorensis	KP014928.1	isolate 66	Lobelia columnaris	MF061188.1	isolate Pz3103	Campanula incanescens	LT706684.1	isolate CAM539	Campanula collina	EF088711.1	isolate CR19	Lobelia heterophylla subsp. heterophylla	MF770605.1
Campanula hawkinsiana	EU437671.1		Campanula scouleri	MK556015.1	BOP104652	Lobelia gregoriana subsp. gregoriana	MF061195.1		Monopsis alba	NC_036082.1		Lobelia thapsoidea	NC_035391.1		Campanula expansa	MK652007.1	isolate BOP104521	Campanula marchesettii	KJ512581.1	isolate 2	Lobelia polyphylla	KY354224.1		Campanula bellidifolia subsp. aucheri	JX914754.1	isolate CAM217	Codonopsis pilosula var. modesta	MF096995.1	isolate KPS0058A03	Campanula collina	FJ587248.1		Campanula glomerata	LT673900.1	isolate CAM013	Clermontia fauriei	NC_035355.1		Lobelia davidii	NC_035372.1		Campanula incurva	LT706603.1	isolate CAM128	Campanula comosiformis	KF957765.1	isolate Cs14	Lobelia holstii	NC_036073.1
Campanula herminii	EU437673.1		Campanula seraglio	EF213358.1	SS-04-17	Lobelia gregoriana subsp. sattimae	KY354218.1		Monopsis debilis var. debilis	MF770616.1		Lobelia thermalis	NC_036081.1		Campanula farinulenta	MK652008.1	isolate BOP104522	Campanula martinii	KJ512564.1	isolate 2	Lobelia puberula	MF770611.1		Campanula bellidifolia subsp. besenginica	JX914997.1	isolate CAM525	Codonopsis rotundifolia	KM675878.1	3797	Campanula conferta	FJ587249.1		Campanula glomerata var. dahurica	HQ704591.1	Kim425	Cyanea fissa	KY354213.1		Lobelia deckenii subsp. deckenii	MF061190.1		Campanula involucrata	LT706614.1	isolate CAM172	Campanula conferta	EF088712.1	isolate CR20	Lobelia hypoleuca	DQ285188.1
Campanula hierapetrae	EU437623.1		Campanula sibirica	EF213360.1	no	Lobelia hartlaubii	NC_036072.1		Monopsis flava	MF770617.1		Lobelia thuliniana	NC_033375.1		Campanula fenestrellata	KF957755.1	isolate Cs4	Campanula medium	EU713272.1	Lammers 876 (OSH)	Lobelia rhynchopetalum	NC_035384.1		Campanula bellidifolia subsp. meyeriana	JX915011.1	isolate CAM540	Codonopsis sp.	MF785739.1	US:3540423	Campanula cretica	EU713437.1		Campanula goulimyi	LT674013.1	isolate CAM413	Cyanea leptostegia	MF061168.1		Lobelia deckenii subsp. incipiens	MF061191.1		Campanula jacobaea	LT706700.1	isolate CAM759	Campanula coriacea	EF088713.1	isolate CR21	Lobelia inflata	NC_033368.1
Campanula hofmannii	KJ689352.1	H1679249	Campanula sibirica subsp. divergens	MK556038.1	BOP205690	Lobelia heterophylla subsp. heterophylla	MF770605.1		Monopsis stellarioides subsp. schimperiana	MF770618.1		Lobelia udzungwensis	NC_035392.1		Campanula fenestrellata subsp. fenestrellata	DQ304593.1		Campanula mirabilis	EU713277.1	Eddie 96056 (EGHB)	Lobelia ritabeaniana	NC_035385.1		Campanula benthamii	JX915085.1	isolate CAM630	Codonopsis subglobosa	KY070787.1	isolate BOP018027-2	Campanula creutzburgii	EU713397.1		Campanula grandis	LT674091.1	isolate CAM338	Delissea rhytidosperma	KY354214.1		Lobelia doniana	NC_035373.1		Campanula jacquinii	LT706613.1	isolate CAM168	Campanula crassipes	MK556537.1	BOP104504	Lobelia jasionoides	NC_033369.1
Campanula immodesta	KT970123.1		Campanula simulans	KT753257.1	isolate AC13	Lobelia holstii	NC_036073.1		Palmerella debilis subsp. serrata	MF061222.1		Lobelia urens	NC_035393.1		Campanula fenestrellata subsp. istriaca	DQ304594.1		Campanula mollis	EU713268.1	Neves 230 (TEX)	Lobelia roughii	DQ356113.1		Campanula bertolae	JX915073.1	isolate CAM608	Codonopsis subscaposa	KM675881.1	BOP018185	Campanula dasyantha subsp. chamissonis	JN571967.1	UAM:Herb:88782	Campanula hagielia	LT673957.1	isolate CAM177	Dialypetalum floribundum	MF061169.1		Lobelia erinus	NC_036098.1		Campanula kermanica	LT706693.1	isolate CAM590	Campanula crenulata	MK556574.1	BOP205087	Lobelia kauaensis	MF061196.1
Campanula jacquinii	EU437674.1		Campanula sp.	EF213356.1	SS-04-16	Lobelia inflata	NC_033368.1		Porterella carnosula	KY354228.1		Lobelia wollastonii	NC_035394.1		Campanula filicaulis	KM042140.1	A17866	Campanula nakaoi	KU375234.1		Lobelia sancta	NC_035386.1		Campanula betonicifolia	JX914844.1	isolate CAM321	Codonopsis subsimplex	KM675882.1	20915092	Campanula decumbens	FJ587250.1		Campanula hawkinsiana	LT674062.1	isolate CAM420	Diastatea micrantha	KP014803.1	isolate LL24	Lobelia fervens subsp. fervens	MF770602.1		Campanula kirikkoleensis	LT706658.1	isolate CAM341	Campanula creutzburgii	EF088714.1	isolate CR22	Lobelia laxa	NC_036074.1
Campanula laciniata	EU437579.1		Campanula sparsa subsp. sphaerothrix	MK556018.1	BOP104664	Lobelia jasionoides	NC_033369.1		Pratia angulata	MF061180.1		Lobelia yuccoides	MF061221.1		Campanula fragilis subsp. cavolinii	DQ304629.1		Campanula odontosepala	KJ689369.1	36255.3-IRAN	Lobelia seguinii	NC_035387.1		Campanula betulifolia	FN396992.1	isolate CAM102	Codonopsis thalictrifolia	KY070747.1	isolate BOP018048	Campanula dichotoma	FJ587251.1		Campanula_hierapetrae	LT673943.1	isolate CAM124	Grammatotheca bergiana	MF770632.1		Lobelia galpinii	NC_036071.1		Campanula kolenatiana	LT706567.1	isolate CAM030	Campanula cymbalaria	EF088715.1	isolate CR23	Lobelia laxiflora	NC_033370.1
Campanula lanata	EU437610.1		Campanula sparsa subsp. sphaerotrix	EF213361.1	SS-05-175	Lobelia kauaensis	MF061196.1		Pratia nummularia	MF061203.1		Monopsis alba	NC_036082.1		Campanula fragilis subsp. fragilis	DQ304626.1		Campanula pallida	KT970197.1		Lobelia sessilifolia	NC_035388.1		Campanula bluemelii	JX915100.1	isolate CAM661	Codonopsis tsinlingensis	KM675888.1	1646248	Campanula dimorphantha	FJ587246.1		Campanula hierosolymitana	LT673988.1	isolate CAM285	Hippobroma longiflora	MF061173.1		Lobelia gibberoa	NC_035374.1		Campanula komarovii	LT706685.1	isolate CAM547	Campanula dasyantha	EF213144.1	SS-05-169	Lobelia linearis	NC_036075.1
Campanula lasiocarpa	JN571927.1	WWB22732	Campanula spicata	MK556019.1	BOP104665	Lobelia laxa	NC_036074.1		Sclerotheca viridiflora	MF061223.1		Monopsis debilis var. debilis	MF770616.1		Campanula garganica	DQ304596.1		Campanula parryi	EU713342.1	Chumley 7365 (TEX)	Lobelia siphilitica var. siphilitica	KY354225.1		Campanula bohemica	JX914951.1	isolate CAM464	Codonopsis tubulosa	KM675889.1	2850	Campanula divaricata	EU713450.1		Campanula hofmannii	LT673897.1	isolate CAM004	Isotoma fluviatilis	KP014790.1	isolate 68	Lobelia gregoriana subsp. elgonensis	MF061194.1		Campanula koyuncui	LT706628.1	isolate CAM203	Campanula debarensis	FJ426575.1		Lobelia longisepala	NC_033371.1
Campanula latifolia	EU437606.1		Campanula stevenii subsp. alberti	MK556035.1	BOP205678	Lobelia laxiflora	NC_033370.1		Siphocampylus krauseanus	NC_035760.1	Smith & Leiva 509	Monopsis flava	MF770617.1		Campanula gieseckeana	MG218140.1	CCDB-24820-B06	Campanula parryi var. idahoensis	JN571950.1	WWB22722	Lobelia sonderiana	NC_036079.1		Campanula bononiensis	JX915200.1	isolate NC3328	Codonopsis viridiflora	KM675892.1	H12093	Campanula drabifolia	FJ587252.1		Campanula hohenackeri	LT673915.1	isolate CAM044	Lithotoma petraea	NC_033365.1		Lobelia gregoriana subsp. gregoriana	MF061195.1		Campanula lactiflora	LT706740.1	isolate CAM839	Campanula decumbens	EF088716.1	isolate CR24	Lobelia lukwangulensis	NC_035376.1
Campanula lusitanica	EU437667.1		Campanula stevenii subsp. altaica	MK556036.1	BOP205681	Lobelia linearis	NC_036075.1		Solenopsis bivonae	MF061224.1		Monopsis stellarioides subsp. schimperiana	MF770618.1		Campanula glomerata	KP159320.1	isolate TKM201460	Campanula parryi var. parryi	JN571952.1	ASU116235	Lobelia spicata	NC_036080.1		Campanula bordesiana	KJ910722.1	A9856	Codonopsis viridis	KM675893.1	899	Campanula edulis	EU713374.1		Campanula humillima	LT674101.1	isolate CAM587	Lobelia aberdarica	NC_035365.1		Lobelia gregoriana subsp. sattimae	KY354218.1		Campanula lamondiae	LT706673.1	isolate CAM474	Campanula dichotoma	KC792350.1	A19021	Lobelia malowensis	NC_036076.1
Campanula macrorhiza	KJ512532.1		Campanula takesimana	KP006497.1		Lobelia malowensis	NC_036076.1		Trematolobelia kauaiensis	NC_035398.1		Palmerella debilis subsp. serrata	MF061222.1		Campanula glomerata var. dahurica	HQ704552.1	Kim425	Campanula patula	JN894553.1	isolate NMW123	Lobelia stricklandiae	NC_033374.1		Campanula bravensis	JX914762.1	isolate CAM225	Cyananthus dolichosceles	JN044331.1	SunH-SC11215	Campanula elatines	AY655147.1		Campanula iconia	LT674001.1	isolate CAM340	Lobelia acrochila	NC_035366.1		Lobelia hartlaubii	NC_036072.1		Campanula lasiocarpa	LT706727.1	isolate CAM302	Campanula dimorphantha	EF088708.1	isolate CR16	Lobelia melliana	NC_035377.1
Campanula marchesettii	KJ512535.1	isolate 2	Campanula thyrsoides	MK556020.1	BOP104668	Lobelia melliana	NC_035377.1		Wimmerella hederacea	NC_033377.1		Porterella carnosula	KY354228.1		Campanula guinochetii	KM042147.1	Montes A10468	Campanula pelviformis	EU713243.1	Cellinese 1010 (YU)	Lobelia stuhlmannii	NC_035389.1		Campanula buseri	JX915099.1	isolate CAM660	Cyananthus formosus	JN044335.1	SunH-YN11217	Campanula elatinoides	KJ512630.1		Campanula incanescens	LT674028.1	isolate CAM539	Lobelia alsinoides	KP014785.1	isolate 69	Lobelia heterophylla subsp. heterophylla	MF770605.1		Campanula latifolia	LT706585.1	isolate CAM059	Campanula divaricata	EF088718.1	isolate CR26	Lobelia mildbraedii	NC_035378.1
Campanula martinii	KJ512536.1		Campanula trachelium	MK556021.1	BOP104673	Lobelia mildbraedii	NC_035378.1					Pratia angulata	MF061180.1		Campanula hawkinsiana	MK651985.1	isolate BOP222178	Campanula pendula	KJ689370.1	H1429996	Lobelia telekii	NC_035390.1		Campanula caespitosa	JX915163.1	isolate NC3178	Cyananthus hookeri	JN044340.1	NieZL-1028	Campanula erinus	EU713398.1		Campanula incurva	LT673945.1	isolate CAM128	Lobelia bambuseti	MF061181.1		Lobelia holstii	NC_036073.1		Campanula lavrensis	LT706672.1	isolate CAM473	Campanula drabifolia	EF088719.1	isolate CR27	Lobelia morogoroensis	NC_033372.1
Campanula medium	EU437607.1		Campanula tridentata	EF213362.1	SS-04-11	Lobelia morogoroensis	NC_033372.1					Pratia nummularia	MF061203.1		Campanula hercegovina	DQ304618.1		Campanula peregrina	EU713320.1	Eddie 95007 (TEX)	Lobelia thapsoidea	NC_035391.1		Campanula calamenthifolia	JX914727.1	isolate CAM188	Cyananthus incanus	MF785740.1		Campanula excisa	KJ512631.1		Campanula involucrata	LT673956.1	isolate CAM172	Lobelia bequaertii	MF061182.1		Lobelia inflata	NC_033368.1		Campanula lehmanniana	LT706736.1	isolate CAM552	Campanula edulis	KJ910678.1	A9997	Lobelia muscoides	NC_035379.1
Campanula mirabilis	EU437612.1		Campanula turczaninovii	MK556052.1	BOP104677	Lobelia muscoides	NC_035379.1					Sclerotheca viridiflora	MF061223.1		Campanula hofmannii	JX987513.1	H1679249	Campanula persicifolia	EU713324.1	Eddie 95027 (EGHB)	Lobelia thermalis	NC_036081.1		Campanula calcarata	JX914999.1	isolate CAM527	Cyananthus inflatus	JN044347.1	SunH-YN11236	Campanula exigua	EU713416.1		Campanula jacobaea	LT674044.1	isolate CAM759	Lobelia boninensis	KY354217.1		Lobelia jasionoides	NC_033369.1		Campanula leucoclada	LT706671.1	isolate CAM471	Campanula elatines	FJ426577.1		Lobelia nicotianifolia	DQ285200.1
Campanula mollis	EU437603.1		Campanula tymphaea	EF213364.1	Hartrig et al. 7246	Lobelia niihauensis	NC_035380.1					Siphocampylus krauseanus	NC_035760.1	Smith & Leiva 509	Campanula hypocrateriformis	KM042148.1	A6911	Campanula petraea	KJ512583.1		Lobelia thuliniana	NC_033375.1		Campanula calcicola	JX915084.1	isolate CAM628	Cyananthus lichiangensis	JN044354.1	SunH-SC0068	Campanula fastigiata	EU643727.1		Campanula jacquinii	LT673955.1	isolate CAM168	Lobelia bridgesii	KP014800.1	isolate 71	Lobelia kauaensis	MF061196.1		Campanula lingulata	LT706659.1	isolate CAM345	Campanula elatinoides	FJ426578.1		Lobelia niihauensis	NC_035380.1
Campanula nakaoi	KU375229.1		Campanula velebitica	MK555993.1	BOP104522	Lobelia organensis	NC_035382.1					Solenopsis bivonae	MF061224.1		Campanula immodesta	MK652084.1	isolate BOP205698	Campanula pinatzii	EU713289.1	M. Avramakis s.n. (NHMC)	Lobelia udzungwensis	NC_035392.1		Campanula californica	JX914835.1	isolate CAM312	Cyananthus lobatus	MF785741.1		Campanula filicaulis	FJ587253.1		Campanula kermanica	LT674037.1	isolate CAM590	Lobelia burttii subsp. burttii	MF061183.1		Lobelia laxa	NC_036074.1		Campanula longistyla	LT706686.1	isolate CAM554	Campanula embergeri	KJ910679.1	A9578	Lobelia organensis	DQ285201.1
Campanula odontosepala	KJ689353.1	36255.3-IRAN	Campanula veneris	KT753261.1	isolate 230B	Lobelia patula	NC_036077.1					Trachelium caeruleum	NC_010442.1		Campanula incanescens	MK652012.1	isolate BOP104554	Campanula piperi	JN571954.1	WWB22726	Lobelia urens	NC_035393.1		Campanula camptoclada	JX914746.1	isolate CAM207	Cyananthus macrocalyx	JN044360.1	SunH-07ZX-2426	Campanula foliosa	FJ587254.1		Campanula kirikkoleensis	LT674002.1	isolate CAM341	Lobelia burttii subsp. meruensis	MF061184.1		Lobelia laxiflora	NC_033370.1		Campanula lourica	LT706694.1	isolate CAM593	Campanula erinus	EF088720.1	isolate CR28	Lobelia patula	NC_036077.1
Campanula pallida	KC282683.1		Campanula waldsteiniana	EF213365.1	SS-04-19	Lobelia petiolata	NC_035383.1					Trematolobelia kauaiensis	NC_035398.1		Campanula incurva	MK652013.1	isolate BOP104555	Campanula portenschlagiana	KJ512584.1		Lobelia wollastonii	NC_035394.1		Campanula cana	JX915083.1	isolate CAM627	Cyanea acuminata	DQ272698.1		Campanula forsythii	KJ512633.1		Campanula kolenatiana	LT673905.1	isolate CAM030	Lobelia burttii subsp. telmaticola	MF061185.1		Lobelia linearis	NC_036075.1		Campanula lyrata	LT706714.1	isolate CAM887	Campanula excisa	KJ512675.1	isolate Seq21	Lobelia petiolata	DQ285202.1
Campanula parryi	EU437675.1		Campanula wanneri	MK556030.1	BOP104971	Lobelia physaloides	MF770620.1					Wimmerella hederacea	NC_033377.1		Campanula isophylla	DQ304630.1		Campanula punctata	KC146497.1	Yoo75363	Lobelia yuccoides	NC_035395.1		Campanula candida	JX915052.1	isolate CAM583	Cyanea asplenifolia	JX500347.1		Campanula fragilis	EU713428.1		Campanula komarovii	LT674029.1	isolate CAM547	Lobelia cardinalis	KP014795.1	isolate LL120	Lobelia longisepala	NC_033371.1		Campanula lyrata subsp. lyrata	LT706772.1	isolate CAM238	Campanula fastigiata	EF088721.1	isolate CR29	Lobelia physaloides	MF770620.1
Campanula parryi var. idahoensis	JN571929.1	WWB22721	Campanula witasekiana	EF213366.1	SS-04-15	Lobelia puberula	MF770611.1								Campanula jacobaea	KY091381.1	LISC:1000	Campanula pyramidalis	EU713322.1	Eddie 96089 (EGHB)	Monopsis alba	NC_036082.1		Campanula carnica	JX915166.1	isolate NC3181	Cyanea coriacea	DQ272699.1		Campanula fruticulosa	EU643716.1		Campanula koyuncui	LT673970.1	isolate CAM203	Lobelia chinensis	NC_035370.1		Lobelia lukwangulensis	NC_035376.1		Campanula macrostachya	LT706612.1	isolate CAM164	Campanula fenestrellata	FJ426579.1		Lobelia polyphylla	KY354224.1
Campanula parryi var. parryi	JN571931.1	RM749390	Carpodetus serratus	MF770619.1		Lobelia rhynchopetalum	NC_035384.1								Campanula justiniana	DQ304613.1		Campanula rapunculoides	EU713285.1	Jansen 8/00-007 (TEX)	Monopsis debilis var. debilis	MF770616.1		Campanula carpatha	JX915209.1	isolate NC3339	Cyanea fissa	KY354213.1		Campanula garganica	FJ587255.1		Campanula lactiflora	LT674104.1	isolate CAM839	Lobelia cliffortiana	KU670691.1	isolate LL255	Lobelia malowensis	NC_036076.1		Campanula macrostyla	LT706648.1	isolate CAM289	Campanula fenestrellata subsp. istriaca	KF957767.1	isolate Cs16	Lobelia puberula	MF770611.1
Campanula patula	KJ512540.1		Centropogon granulosus	MF061166.1		Lobelia seguinii	NC_035387.1								Campanula karakuschensis	MK652014.1	isolate BOP104559	Campanula rapunculus	HE970684.1	MIB:ZPL:03194	Monopsis flava	MF770617.1		Campanula carpatica	JX914755.1	isolate CAM218	Cyanea floribunda	DQ272727.1		Campanula gieseckeana	MG223877.1	CCDB-24820-D06	Campanula lamondiae	LT674017.1	isolate CAM474	Lobelia columnaris	MF061188.1	isolate Pz3103	Lobelia melliana	NC_035377.1		Campanula makaschvilii	LT706571.1	isolate CAM032	Campanula filicaulis	KJ910684.1	A9555	Lobelia rhynchopetalum	NC_035384.1
Campanula pelviformis	EU437578.1		Centropogon gutierrezii	DQ285282.1		Lobelia sessilifolia	HQ704506.1	Yoo75343							Campanula kremeri	KM042153.1	A10556	Campanula reverchonii	EU713259.1	Eddie 00004 (TEX)	Monopsis stellarioides subsp. schimperiana	MF770618.1		Campanula carpatica subsp. turbina	JX914675.1	isolate CAM123	Cyanea hirtella	DQ272729.1		Campanula glomerata	KM360690.1		Campanula lasiocarpa	AB219693.1	specimen_: MAK:K. Senni S1471	Lobelia davidii	NC_035372.1		Lobelia mildbraedii	NC_035378.1		Campanula mardinensis	LT706660.1	isolate CAM346	Campanula foliosa	EF088723.1	isolate CR31	Lobelia ritabeaniana	NC_035385.1
Campanula pendula	KJ689354.1	H1429996	Centropogon nigricans	KY045478.1	Muchhala 118	Lobelia siphilitica var. siphilitica	KY354225.1								Campanula lambertiana	DQ304609.1		Campanula rhomboidalis	KJ512586.1		Palmerella debilis subsp. serrata	MF061222.1		Campanula cashmeriana	JX914756.1	isolate CAM219	Cyanea kuhihewa	DQ272731.1		Campanula glomerata var. dahurica	KC146521.1	Yoo75359	Campanula latifolia	LT673925.1	isolate CAM059	Lobelia deckenii subsp. deckenii	MF061190.1		Lobelia morogoroensis	NC_033372.1		Campanula massalskyi	LT706709.1	isolate CAM764	Campanula fragilis	FJ426580.1		Lobelia sancta	NC_035386.1
Campanula peregrina	EU437654.1		Clermontia arborescens	KC460549.1	isolate WM_BL	Lobelia sonderiana	NC_036079.1								Campanula lanceolata	MK652085.1	isolate BOP205700	Campanula robinsiae	EU713308.1	C.Peterson s.n. (TEX)	Pentaphragma ellipticum	AF130183.1		Campanula caucasica	JX915001.1	isolate CAM529	Cyanea leptostegia	MF061168.1		Campanula grossheimii	EU713393.1		Campanula lavrensis	LT674016.1	isolate CAM473	Lobelia deckenii subsp. incipiens	MF061191.1		Lobelia muscoides	MF061201.1		Campanula medium	LT706573.1	isolate CAM034	Campanula fruticulosa	EF088724.1	isolate CR32	Lobelia seguinii	NC_035387.1
Campanula persicifolia	EU437657.1		Clermontia calophylla	KC460550.1	isolate H_BL	Lobelia spicata	NC_036080.1								Campanula langsdorffiana	MK652016.1	isolate BOP104564	Campanula rotundifolia	JN571958.1	WS342673	Phelline lucida	AJ238343.1		Campanula cecilii	JX915053.1	isolate CAM584	Cyanea pilosa subsp. longipedunculata	DQ272728.1		Campanula hawkinsiana	EU713445.1		Campanula lehmanniana	LT674096.1	isolate CAM552	Lobelia doniana	NC_035373.1		Lobelia niihauensis	NC_035380.1		Campanula micrantha	LT706722.1	isolate CAM236	Campanula garganica	FJ426581.1		Lobelia sessilifolia	NC_035388.1
Campanula petraea	KJ512541.1		Clermontia clermontioides	KC460551.1	isolate H_BL	Lobelia stricklandiae	NC_033374.1								Campanula lasiocarpa	JN571992.1	WWB22732	Campanula sabatia	KJ512587.1		Pratia angulata	MF061180.1		Campanula celsii	JX914904.1	isolate CAM384	Cyclocodon celebicus	KY070863.1	isolate BOP018137-2	Campanula herminii	EU713447.1		Campanula leucoclada	LT674015.1	isolate CAM471	Lobelia excelsa	KP014801.1	isolate LL219	Lobelia organensis	NC_035382.1		Campanula mirabilis	LT706687.1	isolate CAM555	Campanula glomerata	MK556558.1	BOP104676	Lobelia siphilitica var. siphilitica	KY354225.1
Campanula pinatzii	EU437624.1		Clermontia drepanomorpha	KC460552.1	isolate H_BL	Lobelia stuhlmannii	NC_035389.1								Campanula latifolia	KX165651.1	NBGW8008	Campanula sarmatica	EU713279.1	Gaskin 458 (MO)	Pratia nummularia	MF061203.1		Campanula celsii subsp. parnesia	JX914906.1	isolate CAM386	Cyclocodon lancifolius	KY070858.1	isolate BOP018014-1	Campanula hierapetrae	EU713395.1		Campanula lingulata	LT674003.1	isolate CAM345	Lobelia galpinii	NC_036071.1		Lobelia patula	NC_036077.1		Campanula moesiaca	LT706642.1	isolate CAM235	Campanula glomerata var. dahurica	HQ704651.1	Yoo75359	Lobelia sonderiana	NC_036079.1
Campanula piperi	JN571933.1	WWB22726	Clermontia fauriei	NC_035355.1		Lobelia telekii	NC_035390.1								Campanula lehmanniana	KM042156.1	A11116	Campanula saxatilis	EU713242.1	Cellinese 1007 (YU)	Pseudonemacladus oppositifolius	AJ292983.1		Campanula celsii subsp. spathulifolia	JX914909.1	isolate CAM389	Cyphia angustiloba	MF770621.1		Symphyandra hofmannii	EU713377.1		Campanula longistyla	LT674030.1	isolate CAM554	Lobelia gibberoa	NC_035374.1		Lobelia petiolata	NC_035383.1		Campanula myrtifolia	LT706643.1	isolate CAM240	Campanula guinochetii	KJ910686.1	Montes A10468	Lobelia spicata	NC_036080.1
Campanula portenschlagiana	KJ512542.1		Clermontia grandiflora	KC460553.1	isolate WM_BL	Lobelia thapsoidea	NC_035391.1								Campanula lezgina	MK652066.1	isolate BOP104969	Campanula scabrella	JN571960.1	WWB22729	Roussea simplex	AJ277384.1		Campanula cenisia	JX914726.1	isolate CAM186	Cyphia belfastica	MF770623.1		Campanula hofmannii	KJ689360.1	H1679249	Campanula lourica	LT674038.1	isolate CAM593	Lobelia gregoriana subsp. elgonensis	MF061194.1		Lobelia physaloides	MF770620.1		Campanula oligosperma	LT706641.1	isolate CAM231	Campanula haradjanii	EF088726.1	isolate CR34	Lobelia stricklandiae	NC_033374.1
Campanula prenanthoides	JN571934.1	WWB22736	Clermontia hawaiiensis	KC460555.1	isolate H_BL	Lobelia thermalis	NC_036081.1								Campanula lingulata	MK652019.1	isolate BOP104576	Campanula scheuchzeri	JN571962.1	WS268649	Sclerotheca viridiflora	MF061223.1		Campanula cervicaria	FN396997.1	isolate CAM037	Cyphia bulbosa var. bulbosa	MF770624.1		Campanula immodesta	KT970158.1		Campanula lyrata	LT674058.1	isolate CAM887	Lobelia gregoriana subsp. gregoriana	MF061195.1		Lobelia polyphylla	KY354224.1		Campanula olympica	LT706720.1	isolate CAM348	Campanula hawkinsiana	EF213146.1	SS-04-08	Lobelia stuhlmannii	NC_035389.1
Campanula punctata	KC146457.1	Yoo75363	Clermontia kakeana	DQ285260.1		Lobelia thuliniana	NC_033375.1								Campanula longistyla	MK652035.1	isolate BOP104651	Campanula scouleri	KX676902.1	HERB0160	Siphocampylus krauseanus	NC_035760.1	Smith & Leiva 509	Campanula chamissonis	JX915135.1	isolate HAB03	Cyphia crenata	NC_036089.1		Campanula incurva	FJ587256.1		Campanula lyrata subsp. lyrata	LT673985.1	isolate CAM238	Lobelia gregoriana subsp. sattimae	KY354218.1		Lobelia puberula	MF770611.1		Campanula orphanidea	LT706572.1	isolate CAM417	Campanula herminii	JF747588.1		Lobelia telekii	NC_035390.1
Campanula pyramidalis	KJ512543.1		Clermontia kohalae	KC460560.1	isolate H_BL	Lobelia urens	NC_035393.1								Campanula loreyi	MK652086.1	isolate BOP205703	Campanula sibirica	KJ746183.1	isolate xt_plant95	Siphocampylus macropodus	DQ356102.1		Campanula choruhensis	FN397000.1	isolate CAM105	Cyphia dentariifolia	NC_036090.1		Campanula jacobaea	KY091565.1	LISC:3219	Campanula macrostachya	LT673954.1	isolate CAM164	Lobelia hederacea	KP014797.1	isolate 76	Lobelia rhynchopetalum	NC_035384.1		Campanula pallida	LT706698.1	isolate CAM636	Campanula hofmannii	EF088727.1	isolate CR35	Lobelia thapsoidea	NC_035391.1
Campanula rapunculoides	EU437620.1		Clermontia lindseyana	KC460561.1	isolate EM_BL	Lobelia wollastonii	NC_035394.1								Campanula lusitanica	HQ407551.1	isolate CLU03	Campanula spathulata subsp. filicaulis	EU713337.1	Cellinese 1005 (YU)	Siphocampylus scandens	DQ356099.1		Campanula ciliata	FN397001.1	isolate CAM047	Cyphia elata var. gerrardii	MF770627.1		Campanula jacquinii	EU713448.1		Campanula macrostyla	LT673991.1	isolate CAM289	Lobelia inflata	NC_033368.1		Lobelia ritabeaniana	NC_035385.1		Campanula papillosa	LT706703.1	isolate CAM673	Campanula hohenackeri	JX445914.1		Lobelia thermalis	NC_036081.1
Campanula rapunculus	KJ512544.1		Clermontia montis-loa	KC460563.1	isolate H_BL	Lobelia yuccoides	MF061221.1								Campanula macrostachya	MK652022.1	isolate BOP104581	Campanula spicata	KJ512591.1		Solenopsis bivonae	MF061224.1		Campanula circassica	JX915002.1	isolate CAM530	Cyphia glandulifera	MF770628.1		Campanula laciniata	EU713351.1		Campanula makaschvilii	LT673909.1	isolate CAM032	Lobelia irasuensis	KU670690.1	isolate LL23	Lobelia sancta	NC_035386.1		Campanula patula	LT706739.1	isolate CAM820	Campanula hypocrateriformis	KJ910687.1	A6967	Lobelia thuliniana	NC_033375.1
Campanula reverchonii	EU437594.1		Clermontia oblongifolia	KC460564.1	isolate WO_BL	Monopsis alba	NC_036082.1								Campanula marchesettii	DQ304612.1		Campanula stenocodon	KJ512592.1		Trachelium caeruleum	EU017224.1		Campanula cochleariifolia	JX915161.1	isolate NC3176	Cyphia phyteuma	MF770629.1		Gadellia lactiflora	EU643703.1		Campanula mardinensis	LT674004.1	isolate CAM346	Lobelia jasionoides	NC_033369.1		Lobelia seguinii	NC_035387.1		Campanula pelviformis	LT706644.1	isolate CAM256	Campanula immodesta	KU375243.1		Lobelia udzungwensis	NC_035392.1
Campanula rhomboidalis	KJ512545.1		Clermontia pallida	KC460565.1	isolate MO_BL	Monopsis debilis var. debilis	MF770616.1								Campanula medium	HQ823432.1		Campanula takesimana	KC146483.1	KHB090723-016	Trematolobelia kauaiensis	NC_035398.1		Campanula collina	FN397003.1	isolate CAM096	Cyphia tortilis	MF770631.1		Campanula lactiflora	KJ512635.1		Campanula massalskyi	LT674053.1	isolate CAM764	Lobelia kalmii	KP014793.1	isolate LL217	Lobelia sessilifolia	HQ704623.1	Yoo75343	Campanula pendula	LT706689.1	isolate CAM575	Campanula incanescens	KJ910688.1	A11126	Lobelia urens	NC_035393.1
Campanula robinsiae	EU437642.1		Clermontia parviflora	DQ285288.1		Monopsis flava	MF770617.1								Campanula mekongensis	MK652023.1	isolate BOP104587	Campanula thyrsoides	KJ512593.1		Wimmerella hederacea	NC_033377.1		Campanula collina subsp. fondervisii	JX915003.1	isolate CAM531	Delissea rhytidosperma	KY354214.1		Campanula lanata	FJ587259.1		Campanula medium	LT673911.1	isolate CAM034	Lobelia kauaensis	MF061196.1		Lobelia siphilitica	HQ594045.1	KSR 021	Campanula peregrina	LT706611.1	isolate CAM158	Campanula incurva	MK556542.1	BOP104555	Lobelia villosa	DQ285215.1
Campanula rotundifolia	JN571937.1	WS342673	Clermontia peleana	KC460566.1	isolate H_BL	Monopsis stellarioides subsp. schimperiana	MF770618.1								Campanula moesiaca	MK652024.1	isolate BOP104589	Campanula trachelium	MK519735.1	v0260060WIS				Campanula colorata	JX915095.1	isolate CAM646	Delissea subcordata	DQ272701.1		Campanula lasiocarpa	JN571968.1	UAM:Herb:72345	Campanula micrantha	LT674072.1	isolate CAM236	Lobelia laxiflora	KP014799.1	isolate 78	Lobelia siphilitica var. siphilitica	KY354225.1		Campanula perpusilla	LT706762.1	isolate CAM596	Campanula involucrata	EF088729.1	isolate CR37	Lobelia vivaldii	DQ285206.1
Campanula sabatia	KJ512546.1		Clermontia persicifolia	KC460567.1	isolate WO_BL	Palmerella debilis subsp. serrata	MF061222.1								Campanula mollis	KM042157.1	CN1303	Campanula trachelium subsp. trachelium	HE970685.1	MIB:ZPL:03224				Campanula columnaris	JX914928.1	isolate CAM409	Dialypetalum floribundum	MF061169.1		Campanula latifolia	FJ587260.1		Campanula mirabilis	LT674031.1	isolate CAM555	Lobelia longisepala	NC_033371.1		Lobelia sonderiana	NC_036079.1		Campanula persicifolia	LT706752.1	isolate CAM257	Campanula isophylla	FJ426583.1		Lobelia wollastonii	NC_035394.1
Campanula sarmatica	EU437614.1		Clermontia pyrularia	KC460569.1	isolate H_BL	Pankycodon purpureus	KP318272.1	US2582204							Campanula morettiana	DQ304602.1		Campanula tubulosa	EU713245.1	Cellinese 1012 (YU)				Campanula conferta	JX914846.1	isolate CAM325	Diastatea micrantha	MF061170.1		Campanula lusitanica	EU643714.1		Campanula moesiaca	LT673984.1	isolate CAM235	Lobelia lukwangulensis	NC_035376.1		Lobelia spicata	NC_036080.1		Campanula peshmenii	LT706732.1	isolate CAM351	Campanula jacobaea	KC792356.1	A9506	Lobelia yuccoides	NC_035395.1
Campanula saxatilis	EU437577.1		Clermontia samuelii	KC460570.1	isolate EM_BL	Peracarpa carnosa var. circaeoides	HQ704501.1	Yoo75152							Campanula nakaoi	MK652077.1	isolate BOP162106	Campanula uniflora	JN571964.1	UAM:Herb:39807				Campanula constantinii	JX914931.1	isolate CAM412	Downingia cuspidata	MF061171.1		Campanula macrorhiza	KJ512636.1		Campanula myrtifolia	LT673986.1	isolate CAM240	Lobelia melliana	NC_035377.1		Lobelia stricklandiae	NC_033374.1		Campanula petrophila	LT706580.1	isolate CAM050	Campanula karakuschensis	EF088730.1	isolate CR38	Monopsis alba	NC_036082.1
Campanula scheuchzeri	JN571940.1	WS268649	Clermontia tuberculata	KC460571.1	isolate EM_BL	Platycodon grandiflorum	HQ704502.1	Yoo75331							Campanula occidentalis	KM042161.1	A18990	Campanula versicolor	KJ512594.1					Campanula coriacea	JX914815.1	isolate CAM290	Downingia elegans	MF061172.1		Campanula macrostachya	MK555361.1	BOP104581	Campanula oligosperma	LT673983.1	isolate CAM231	Lobelia mildbraedii	NC_035378.1		Lobelia stuhlmannii	NC_035389.1		Campanula pinnatifida	LT706661.1	isolate CAM352	Campanula kemulariae	JX445911.1		Monopsis debilis var. debilis	MF770616.1
Campanula scouleri	JN571941.1	WWB22739	Clermontia waimeae	KC460572.1	isolate H_BL	Platycodon grandiflorus	MG775429.1								Campanula odontosepala	JX987515.1	36255.3-IRAN	Campanula vidalii	HM850771.1					Campanula crassipes	JX914964.1	isolate CAM484	Echinocodon lobophyllus	KY070866.1	isolate BOP018038	Campanula macrostyla	EU643722.1		Campanula olympica	LT674070.1	isolate CAM348	Lobelia morogoroensis	NC_033372.1		Lobelia telekii	NC_035390.1		Campanula podocarpa	LT706705.1	isolate CAM722	Campanula keniensis	KJ910689.1	Gilbert 4900 (Nairobi Museum)	Monopsis flava	MF770617.1
Campanula sibirica	KJ512548.1		Codonopsis affinis	KP318291.1	HUH359211	Platycodon grandiflorus f. albiflorus	HQ704503.1	Yoo75345							Campanula orphanidea	MK652025.1	isolate BOP104592	Campanula wanneri	KJ689371.1	H1482964				Campanula crenulata	JX915093.1	isolate CAM644	Edraianthus graminifolius	KJ146679.1	isolate individual #1 pop-variant Zlatibor Mt	Campanula marchesettii	KJ512639.1	isolate 2	Campanula orphanidea	LT673910.1	isolate CAM417	Lobelia muscoides	NC_035379.1		Lobelia thapsoidea	NC_035391.1		Campanula pontica	LT706733.1	isolate CAM356	Campanula kolenatiana	JX445915.1		Monopsis stellarioides subsp. schimperiana	MF770618.1
Campanula spathulata subsp. filicaulis	EU437670.1		Codonopsis argentea	KP318292.1	NY627	Pratia angulata	MF061180.1								Campanula pallida	KC282644.1		Campanula witasekiana	KJ512595.1					Campanula cretica	JX914963.1	isolate CAM483	Grammatotheca bergiana	MF770632.1		Campanula martinii	KJ512619.1		Campanula pallida	LT674042.1	isolate CAM636	Lobelia nana	KP014796.1	isolate LL105	Lobelia thermalis	NC_036081.1		Campanula prenanthoides	LT706728.1	isolate CAM311	Campanula kremeri	KX009152.1	isolate Spain_Istan	Palmerella debilis subsp. serrata	MF061222.1
Campanula spicata	KJ512550.1		Codonopsis benthamii	KP318293.1	HUH359209	Pratia nummularia	MF061203.1								Campanula parryi var. idahoensis	JN571993.1	WWB22722	Campanula zangezura	KJ689372.1	H733327				Campanula creutzburgii	JX914764.1	isolate CAM227	Hanabusaya asiatica	KJ477692.1	Yoo86859	Campanula medium	EU713379.1		Campanula papillosa	LT674047.1	isolate CAM673	Lobelia niihauensis	NC_035380.1		Lobelia thuliniana	NC_033375.1		Campanula psilostachya	LT706757.1	isolate CAM358	Campanula lanata	EF088731.1	isolate CR39	Porterella carnosula	KY354228.1
Campanula stenocodon	KJ512551.1		Codonopsis bulleyana	KP318322.1	KWNU89896	Pseudocodon graminifolius	KP318284.1	KWNU89895							Campanula parryi var. parryi	JN571994.1	RM749390	Campanulastrum americanum	EU713312.1	Eddie 96050 (TEX)				Campanula crispa	JX914848.1	isolate CAM328	Himalacodon dicentrifolius	KM675896.1	BOP018003	Campanula mirabilis	EU713384.1		Campanula patula	LT674103.1	isolate CAM820	Lobelia organensis	NC_035382.1		Lobelia udzungwensis	NC_035392.1		Campanula ptarmicifolia	LT706662.1	isolate CAM359	Campanula lanceolata	MK556590.1	BOP205700	Pratia angulata	MF061180.1
Campanula takesimana	KY368979.1	H.J.Kim8418	Codonopsis canescens	KP318295.1	HUH359225	Sclerotheca viridiflora	MF061223.1								Campanula patula	FM212739.1	isolate CPA01ITS	Canarina canariensis	EU713246.1	Eddie 96048 (EGHB)				Campanula cymaea	JX914930.1	isolate CAM411	Hippobroma longiflora	MF061173.1		Campanula mollis	EU713375.1		Campanula pelviformis	LT673987.1	isolate CAM256	Lobelia petiolata	NC_035383.1		Lobelia urens	NC_035393.1		Campanula pterocaula	LT706751.1	isolate CAM251	Campanula lasiocarpa	AB219602.1	specimen_: MAK:K. Senni S1471	Pratia nummularia	MF061203.1
Campanula thyrsoides	KJ512552.1		Codonopsis chimiliensis	KP318296.1	US1378070	Siphocampylus krauseanus	NC_035760.1	Smith & Leiva 509							Campanula pendula	JX987516.1	H1429996	Carpodetus serratus	AJ429383.1					Campanula cymbalaria	JX914724.1	isolate CAM183	Hypsela tridens	MF061174.1		Campanula moravica	FJ587262.1		Campanula pendula	LT674033.1	isolate CAM575	Lobelia polyphylla	KY354224.1		Lobelia wollastonii	NC_035394.1		Campanula punctata	KU198434.1		Campanula latifolia	DQ356169.1		Sclerotheca forsteri	DQ285209.1
Campanula trachelium	AJ235423.2		Codonopsis chlorocodon	KP318297.1	NY28739	Solenopsis bivonae	MF061224.1								Campanula peregrina	EU177772.1	Davis 1844 €	Centropogon granulosus	MF061166.1					Campanula daghestanica	JX915004.1	isolate CAM532	Isotoma hypocrateriformis	MF061176.1	isolate K5274	Campanula nakaoi	KU375239.1		Campanula peregrina	LT673953.1	isolate CAM158	Lobelia puberula	MF770611.1		Lobelia yuccoides	MF061221.1		Campanula quercetorum	LT706663.1	isolate CAM362	Campanula ledebouriana	GQ254910.1	isolate 1249	Sclerotheca jayorum	DQ285195.1
Campanula tubulosa	EU437580.1		Codonopsis clematidea	KP318298.1	JE5398	Trematolobelia kauaiensis	NC_035398.1								Campanula persicifolia	DQ304590.1		Centropogon nigricans	KY045478.1	Muchhala 118				Campanula damascena	JX914723.1	isolate CAM182	Isotoma tridens	NC_035362.1		Campanula odontosepala	KJ689361.1	36255.3-IRAN	Campanula perpusilla	LT674100.1	isolate CAM596	Lobelia rhynchopetalum	NC_035384.1		Monopsis alba	NC_036082.1		Campanula ramosissima	LT706610.1	isolate CAM152	Campanula lehmanniana	KJ910696.1	A11116	Sclerotheca viridiflora	MF061223.1
Campanula versicolor	KJ512553.1		Codonopsis convolvulacea	KP318316.1	HUH359224	Wahlenbergia marginata	HQ704504.1	Yoo75148							Campanula piperi	JN571995.1	WWB22726	Centropogon valeri	GQ429075.1	LA8268				Campanula damboldtiana	JX914849.1	isolate CAM329	Legenere valdiviana	NC_035364.1		Campanula olympica	FJ587263.1		Campanula persicifolia	LT674075.1	isolate CAM257	Lobelia ritabeaniana	NC_035385.1		Monopsis debilis var. debilis	MF770616.1		Campanula rapunculoides	LT706574.1	isolate CAM036	Campanula longistyla	MK556553.1	BOP104651	Siphocampylus krauseanus	NC_035760.1
Campanula wanneri	KJ689355.1	H1482964	Codonopsis convolvulacea subsp. forrestii	KP318318.1	US3043512	Wimmerella hederacea	NC_033377.1								Campanula pollinensis	KF957740.1	isolate Ct3	Clermontia arborescens subsp. waihiae	JX500341.1					Campanula darialica	FN397004.1	isolate CAM098	Leptocodon hirsutus	KY070816.1	isolate BOP018007-2	Campanula pallida	KC282760.1		Campanula peshmenii	LT674088.1	isolate CAM351	Lobelia sancta	NC_035386.1		Monopsis flava	MF770617.1		Campanula rapunculus	LT706744.1	isolate CAM894	Campanula lusitanica	EF088733.1	isolate CR41	Solenopsis bivonae	MF061224.1
Campanula wilkinsiana	JN571942.1	WWB22740	Codonopsis convolvulacea subsp. vinciflora	KP318317.1	S13-6898										Campanula polyclada	KM042162.1	Rechinger 36562	Clermontia calophylla	JX845874.1	isolate C151				Campanula dasyantha	JX915006.1	isolate CAM534	Lobelia aberdarica	KU238152.1	L.Y. Chen et al. S140 (M)	Campanula parryi	EU713449.1		Campanula petrophila	LT673919.1	isolate CAM050	Lobelia seguinii	NC_035387.1		Monopsis stellarioides subsp. schimperiana	MF770618.1		Campanula reiseri	LT706627.1	isolate CAM200	Campanula lyrata	EF088734.1	isolate CR42	Trachelium caeruleum	NC_010442.1
Campanula zangezura	KJ689356.1	H733327	Codonopsis cordifolioidea	KP318299.1	MBK29302										Campanula portenschlagiana	KF957758.1	isolate Cs7	Clermontia clermontioides subsp. clermontioides	JX845875.1	isolate C152				Campanula dasyantha subsp. chamissonis	JX915005.1	isolate CAM533	Lobelia acrochila	NC_035366.1		Campanula parryi var. idahoensis	JN571970.1	WWB22721	Campanula pinnatifida	LT674005.1	isolate CAM352	Lobelia sessilifolia	NC_035388.1		Palmerella debilis subsp. serrata	MF061222.1		Campanula reuteriana	LT706664.1	isolate CAM364	Campanula macrochlamys	EF088735.1	isolate CR43	Trematolobelia kauaiensis	NC_035398.1
Campanulastrum americanum	EU437646.1		Codonopsis efilamentosa	KP318319.1	US1213698										Campanula portenschlagiana var. pumila	KF957741.1	isolate Ct4	Clermontia drepanomorpha	JX845882.1	isolate C200				Campanula davisii	JX914850.1	isolate CAM330	Lobelia anceps	NC_033366.1		Campanula parryi var. parryi	JN571974.1	ASU116235	Campanula podocarpa	LT674049.1	isolate CAM722	Lobelia siphilitica var. siphilitica	KY354225.1		Pankycodon purpureus	KP318164.1	US2582204	Campanula rhomboidalis	LT706738.1	isolate CAM819	Campanula macrorhiza	KJ512683.1	isolate 2	Trematolobelia macrostachys	DQ285193.1
Canarina canariensis	EU437581.1		Codonopsis farreri	KP318301.1	US3514514										Campanula poscharskyana	DQ304601.1		Clermontia fauriei	NC_035355.1					Campanula delavayi	JX915092.1	isolate CAM643	Lobelia bambuseti	KU238153.1	Sino-African research group SAJIT-002087 (HIB, M)	Campanula patula	KJ512640.1		Campanula pontica	LT674089.1	isolate CAM356	Lobelia spicata	NC_036080.1		Peracarpa carnosa var. circaeoides	HQ704618.1	Yoo75152	Campanula romanica	LT706723.1	isolate CAM248	Campanula macrostachya	EF088736.1	isolate CR44	Wimmerella hederacea	NC_033377.1
Carpodetus serratus	MF770619.1		Codonopsis foetens subsp. nervosa	KP318303.1	HUH359220										Campanula prenanthoides	MK652087.1	isolate BOP205709	Clermontia grandiflora subsp. grandiflora	JX845869.1	isolate C32				Campanula delicatula	JX914805.1	isolate CAM277	Lobelia bequaertii	MF061182.1		Campanula pelviformis	EU713350.1		Campanula prenanthoides	LT674082.1	isolate CAM311	Lobelia stricklandiae	NC_033374.1		Platycodon grandiflorum	HQ704619.1	Yoo75331	Campanula rotundifolia	LT706721.1	isolate CAM247	Campanula macrostyla	EF088737.1	isolate CR45
Centropogon aequatorialis	EF174622.1	Muchhala 131	Codonopsis javanica	KP318315.1	US3525946										Campanula primulifolia	EU177773.1	Matos et al. 13680 €	Clermontia kakeana	JX500340.1	Johansen 5				Campanula demirsoyi	JX914852.1	isolate CAM332	Lobelia burttii	KU238149.1	Sino-African research group SAJIT-002560 (HIB, M)	Campanula pendula	KT970181.1		Campanula psilostachya	LT674092.1	isolate CAM358	Lobelia stuhlmannii	NC_035389.1		Platycodon grandiflorus f. albiflorus	HQ704620.1	Yoo75345	Campanula rumeliana	LT706606.1	isolate CAM133	Campanula marchesettii	KJ512686.1	isolate 2
Centropogon baezanus	EF174612.1	Muchhala 162	Codonopsis kawakamii	KP318304.1	US3241228										Campanula ptarmicifolia var. ptarmicifolia	EF090541.1		Clermontia kohalae	JX845867.1	isolate C5				Campanula dichotoma	JX914853.1	isolate CAM333	Lobelia burttii subsp. burttii	MF061183.1		Campanula peregrina	EU713427.1		Campanula ptarmicifolia	LT674006.1	isolate CAM359	Lobelia telekii	NC_035390.1		Porterella carnosula	KY354228.1		Campanula rupicola	LT706667.1	isolate CAM404	Campanula medium	EF088738.1	isolate CR46
Centropogon comosus	EF174630.1	Luteyn et al. 15078	Codonopsis lanceolata	KP318323.1	KWNU89890										Campanula pubicalyx	KM042163.1	A9786	Clermontia lindseyana	JX845883.1	isolate C201				Campanula dimorphantha	KJ910731.1	Wang 1353 (LE)	Lobelia burttii subsp. meruensis	MF061184.1		Campanula persicifolia	FJ587264.1		Campanula pterocaula	LT674074.1	isolate CAM251	Lobelia thapsoidea	NC_035391.1		Pratia angulata	MF061180.1		Campanula ruprechtii	LT706695.1	isolate CAM598	Campanula mollis	KC792346.1	A9926
Centropogon glabrifilis	EF174627.1	Muchhala 152	Codonopsis minima	KP318326.1	KWNU89891										Campanula pulla	DQ304605.1		Clermontia micrantha	JX845870.1	isolate C46				Campanula divaricata	FN397005.1	isolate CAM033	Lobelia burttii subsp. telmaticola	MF061185.1		Campanula petraea	KJ512641.1		Campanula punctata	HQ704589.1	Kim375	Lobelia thuliniana	NC_033375.1		Pratia nummularia	MF061203.1		Campanula saonissia	LT706711.1	isolate CAM777	Campanula monodiana	KJ910703.1	A30026
Centropogon grandidentatus	EF174625.1	UCBG 810952	Codonopsis ovata	KP318305.1	US1609608										Campanula punctata	MH711201.1	Q219	Clermontia montis-loa	JX845876.1	isolate C157				Campanula dolomitica	JX915007.1	isolate CAM535	Lobelia cardinalis	HG963904.1	specimen NPL0621	Campanula pinatzii	EU713396.1		Campanula quercetorum	LT674007.1	isolate CAM362	Lobelia tupa	KP014802.1	isolate 82	Pseudocodon graminifolius	KP318176.1	KWNU89895	Campanula sarmatica	LT706650.1	isolate CAM293	Campanula moravica	EF088740.1	isolate CR48
Centropogon granulosus	MF061166.1		Codonopsis pilosula	KP318324.1	KWNU89892										Campanula pyramidalis	KC181016.1	isolate #268 clone 7	Clermontia oblongifolia subsp. oblongifolia	JX845878.1	isolate C189				Campanula drabifolia	JX914916.1	isolate CAM396	Lobelia chinensis	KX346963.2	S-BBLian-07	Campanula piperi	JN571975.1	WWB22724	Campanula ramosissima	LT673952.1	isolate CAM152	Lobelia udzungwensis	NC_035392.1		Scaevola taccada	NC_040933.1	14CS8229 (KUN)	Campanula sartorii	LT706602.1	isolate CAM126	Campanula nakaoi	KU375244.1
Centropogon granulosus subsp. granulosus	EF174611.1	MBG 894806	Codonopsis pilosula subsp. handeliana	KP318306.1	S13-6799										Campanula raineri	DQ304604.1		Clermontia parviflora	JX845868.1	isolate C11				Campanula dzaaku	JX915008.1	isolate CAM536	Lobelia clavata	KT957609.1	Z.H. Luo et al. JD131 (KUN)	Campanula portenschlagiana	KF997316.1	isolate BF159	Campanula rapunculoides	LT673912.1	isolate CAM036	Lobelia urens	NC_035393.1		Sclerotheca viridiflora	MF061223.1		Campanula scoparia	LT706704.1	isolate CAM680	Campanula numidica	KJ910704.1	A19027
Centropogon granulosus subsp. nutans	EF174610.1	Muchhala 138	Codonopsis pilosula subsp. tangshen	KP318307.1	NY186										Campanula ramosissima	HQ407548.1	isolate CRM01	Clermontia peleana	JX845880.1	isolate C193				Campanula dzyschrica	JX915009.1	isolate CAM537	Lobelia columnaris	MF061188.1	isolate Pz3103	Campanula poscharskyana	FJ587266.1		Campanula rapunculus	LT674109.1	isolate CAM894	Lobelia wollastonii	NC_035394.1		Siphocampylus krauseanus	NC_035760.1	Smith & Leiva 509	Campanula scutellata	LT706608.1	isolate CAM140	Campanula occidentalis	KJ910706.1	Molero & Rovira 39
Centropogon llanganatensis	EF174626.1	Muchhala 139	Codonopsis subscaposa	KP318309.1	S13-6826										Campanula rapunculoides	HQ823434.1		Clermontia singuliflora	JX845881.1	isolate C195				Campanula edulis	JX915236.1	isolate NC3397	Lobelia davidii	NC_035372.1		Campanula prenanthoides	JN571972.1	WWB22736	Campanula reiseri	LT673969.1	isolate CAM200	Lobelia yuccoides	NC_035395.1		Solenopsis bivonae	MF061224.1		Campanula sibirica	LT706607.1	isolate CAM139	Campanula olympica	EF088741.1	isolate CR49
Centropogon medusa	EF174628.1	Muchhala 174	Codonopsis subsimplex	KP318310.1	US3124878										Campanula rapunculus	KY009374.1	isolate CQT1	Clermontia tuberculata	JX845871.1	isolate C68				Campanula ekimiana	JX914854.1	isolate CAM334	Lobelia deckenii	KU238154.1	Sino-African research group SAJIT-002147 (HIB, M)	Campanula primulifolia	EU643718.1		Campanula reuteriana	LT674008.1	isolate CAM364	Lysipomia pumila	KP014791.1	isolate LL104	Trachelium caeruleum	EU017251.1		Campanula sibirica subsp. divergentiformis	LT706590.1	isolate CAM079	Campanula pallida	KT970291.1
Centropogon nigricans	KY045478.1	Muchhala 118	Codonopsis tubulosa	KP318321.1	KWNU89893										Campanula reatina	KF957760.1	isolate Cs9	Clermontia waimeae	JX845872.1	isolate C109				Campanula elatines	JX915116.1	isolate 12T	Lobelia deckenii subsp. deckenii	MF061190.1		Campanula propinqua	FJ587267.1		Campanula rhomboidalis	LT674102.1	isolate CAM819	Lysipomia vitreola	KP014792.1	isolate LL240	Trematolobelia kauaiensis	NC_035398.1		Campanula sp.	LT706770.1	CAM104 isolate CAM104	Campanula parryi	EF213147.1
Centropogon salviiformis	EF174629.1	Muchhala 173	Codonopsis ussuriensis	HQ704459.1	Yoo56567										Campanula recta	MK652031.1	isolate BOP104636	Codonopsis affinis	KT970199.1					Campanula elatinoides	FN397008.1	isolate CAM057	Lobelia deckenii subsp. incipiens	MF061191.1		Campanula ptarmicifolia	EU643710.1		Campanula romanica	LT674073.1	isolate CAM248	Palmerella debilis subsp. serrata	MF061222.1		Wahlenbergia marginata	HQ704621.1	Yoo75148	Campanula spatulata	LT706605.1	isolate CAM132	Campanula parryi var. parryi	JN572012.1	RM779069
Centropogon sodiroanus	EF174624.1	Muchhala 117	Codonopsis viridiflora	KP318302.1	HUH359218										Campanula rhomboidalis	MK652032.1	isolate BOP104639	Codonopsis alpina	KF366758.1	28529				Campanula embergeri	KC792329.1	A9575	Lobelia doniana	NC_035373.1		Campanula pterocaula	FJ587268.1		Campanula rotata	MK556716.1	BOP222018	Pratia angulata	MF061180.1		Wimmerella hederacea	NC_033377.1		Campanula speciosa	LT706647.1	isolate CAM288	Campanula patula	EF213148.1	SS-05-174
Centropogon solanifolius	EF174613.1	Muchhala 137	Cyanea acuminata	DQ285261.1											Campanula rotata	MK651982.1	isolate BOP222018	Codonopsis benthamii	KF366761.1	31149				Campanula erinus	JX914722.1	isolate CAM181	Lobelia erectiuscula	KT957612.1	Qingzang Group 751869 (KUN)	Campanula pubicalyx	EU643717.1		Campanula rotundifolia	LT674078.1	isolate CAM275	Pratia nummularia	MF061203.1					Campanula spicata	LT706583.1	isolate CAM053	Campanula pendula	KT970292.1
Centropogon sp.	EF174618.1	UCBG 902279	Cyanea coriacea	DQ285262.1											Campanula rotundifolia	KY009372.1	isolate CPW2	Codonopsis bhutanica	KC282728.1					Campanula euboica	JX914933.1	isolate CAM414	Lobelia erinus	NC_036098.1		Campanula punctata	KC146537.1	Yoo75363	Campanula rumeliana	LT673948.1	isolate CAM133	Sclerotheca viridiflora	MF061223.1					Campanula stellaris	LT706625.1	isolate CAM198	Campanula peregrina	EF088742.1	isolate CR50
Centropogon tessmannii	EF174619.1	Muchhala 168	Cyanea fissa	KY354213.1											Campanula sauvagei	KM042164.1	Montes A9701	Codonopsis bomiensis	KY070898.1	isolate BOP018013				Campanula evolvulacea	JX914751.1	isolate CAM214	Lobelia excelsa	DQ272713.1		Campanula pyramidalis	EU713429.1		Campanula rupicola	LT674011.1	isolate CAM404	Siphocampylus actinothrix	KP014812.1	isolate LL190				Campanula stevenii	LT706759.1	isolate CAM372	Campanula persicifolia	EF213149.1	SS-05-171
Clermontia fauriei	NC_035355.1		Cyanea floribunda	DQ285290.1											Campanula saxifragoides	KM042165.1	A9539	Codonopsis bulleyana	KT970201.1					Campanula excisa	JX914962.1	isolate CAM482	Lobelia fervens subsp. fervens	MF770602.1		Campanula quercetorum	FJ587269.1		Campanula ruprechtii	LT674039.1	isolate CAM598	Siphocampylus aff. rictus	KP014811.1	Lagomarsino 341 isolate LL166				Campanula stevenii subsp. alberti	LT706749.1	isolate CAM567	Campanula pinatzii	EF088744.1	isolate CR52
Codonopsis affinis	KT970127.1		Cyanea hirtella	DQ285292.1											Campanula scabrella	JN571989.1	WWB22729	Codonopsis canescens	KC282722.1					Campanula exigua	JX914836.1	isolate CAM313	Lobelia galpinii	NC_036071.1		Campanula radula	FJ587270.1		Campanula saonissia	LT674055.1	isolate CAM777	Siphocampylus ambivalens	KP014806.1	isolate LL110				Campanula stevenii subsp. beauverdiana	LT706758.1	isolate CAM371	Campanula pinnatifida	EF088745.1	isolate CR53
Codonopsis alpina	KF366722.1	28529	Cyanea kuhihewa	DQ285294.1											Campanula scheuchzeri	DQ304614.1		Codonopsis cardiophylla	KF366763.1	5640				Campanula fastigiata	JX914787.1	isolate CAM258	Lobelia gibberoa	NC_035374.1		Campanula rapunculoides	FJ587271.1		Campanula sarmatica	LT673993.1	isolate CAM293	Siphocampylus andinus	KP014984.1	isolate LL94				Campanula stricta	LT706609.1	isolate CAM151	Campanula piperi	JN572014.1	WWB22725
Codonopsis argentea	KT970128.1		Cyanea leptostegia	MF061168.1											Campanula scouleri	JN571990.1	WWB22739	Codonopsis chlorocodon	KF366764.1	H12071				Campanula fedorovii	FN397009.1	isolate CAM046	Lobelia glandulosa	MH621972.1	Trotta950456	Campanula rapunculus	KJ512643.1		Campanula sartorii	LT673944.1	isolate CAM126	Siphocampylus angustiflorus	KP014887.1	isolate LL196				Campanula strigosa	LT706708.1	isolate CAM760	Campanula pollinensis	KF957747.1	isolate Ct10
Codonopsis benthamii	KF366726.1	33148	Cyanea pilosa subsp. longipedunculata	DQ285291.1											Campanula secundiflora	KC181042.1	isolate #205	Codonopsis clematidea	KC282723.1					Campanula fenestrellata	JX914750.1	isolate CAM213	Lobelia gloria-montis	DQ272702.1		Campanula reverchonii	EU713366.1		Campanula scoparia	LT674048.1	isolate CAM680	Siphocampylus antioquianus	KP014943.1	isolate LL197				Campanula suanetica	LT706688.1	isolate CAM568	Campanula polyclada	EF088746.1	isolate CR54
Codonopsis bhutanica	KC282686.1		Cyclocodon lancifolius	KP318314.1	HUH359222										Campanula serhouchenensis	KM042169.1	A9526	Codonopsis convolvulacea	KC282735.1					Campanula fenestrellata subsp. istriaca	JX914712.1	isolate CAM170	Lobelia gregoriana subsp. elgonensis	MF061194.1		Campanula rhomboidalis	KJ512644.1		Campanula scutellata	LT673950.1	isolate CAM140	Siphocampylus aureus	KP014898.1	isolate LL111				Campanula takesimana	KP006497.1		Campanula portenschlagiana	KF957768.1	isolate Cs17
Codonopsis bulleyana	KC282687.1		Cyphia angustiloba	MF770621.1											Campanula sibirica	MK652036.1	isolate BOP104656	Codonopsis convolvulacea subsp. grey-wilsonii	KY070944.1	isolate BOP018127-2				Campanula filicaulis	KJ910746.1	A18961	Lobelia gregoriana subsp. gregoriana	MF061195.1		Campanula robinsiae	EU713415.1		Campanula sibirica	LT673949.1	isolate CAM139	Siphocampylus ayersiae	KP014965.1	isolate LL88				Campanula takhtadzhianii	LT706652.1	isolate CAM300	Campanula portenschlagiana var. pumila	KF957748.1	isolate Ct11
Codonopsis canescens	KC282688.1		Cyphia banksiana	MF770622.1											Campanula sibirica subsp. divergens	MK652006.1	isolate BOP104519	Codonopsis convolvulacea subsp. vinciflora	KY070976.1	isolate BOP018040				Campanula flaccidula	JX914855.1	isolate CAM335	Lobelia gregoriana subsp. sattimae	KY354218.1		Campanula rotundifolia	JN571978.1	WWB20359	Campanula sibirica subsp. divergentiformis	LT673930.1	isolate CAM079	Siphocampylus betulifolius	KP014904.1	isolate 88				Campanula telephioides	LT706655.1	isolate CAM376	Campanula poscharskyana	FJ426588.1
Codonopsis cardiophylla	KF366727.1	5640	Cyphia belfastica	MF770623.1											Campanula skanderbegii	KF957762.1	isolate Cs11	Codonopsis convolvulacea var. efilamentosa	KC282737.1					Campanula floridana	JX915138.1	isolate HAB06	Lobelia hypoleuca	DQ272703.1		Diosphaera rumeliana	EU643726.1		Campanula sp.	LT673939.1	CAM104 isolate CAM104	Siphocampylus bilabiatus	KP015018.1	isolate LL89				Campanula teucrioides	LT706665.1	isolate CAM377	Campanula prenanthoides	EF088748.1	isolate CR56
Codonopsis chlorocodon	KF366728.1	H12071	Cyphia bulbosa var. bulbosa	MF770624.1											Campanula solstitialis	MK652090.1	isolate BOP205715	Codonopsis cordifolioidea	KF366766.1	26972				Campanula foliosa	FN397010.1	isolate CAM110	Lobelia inflata	KP643287.1	SCBI-SIGEO_13_0271	Campanula sabatia	KJ512645.1		Campanula spatulata	LT673947.1	isolate CAM132	Siphocampylus boliviensis	KP014961.1	isolate LL183				Campanula thessala	LT706604.1	isolate CAM129	Campanula primulifolia	EF088699.1	isolate CR7
Codonopsis clematidea	KC282689.1		Cyphia crenata	NC_036089.1											Campanula sp.	KM215788.1	IR-2014	Codonopsis deltoidea	KF366767.1	H12083				Campanula formanekiana	JX914720.1	isolate CAM179	Lobelia iteophylla	KU238151.1	Y.L. Li et al. YDDXSB098 (KUN)	Campanula sarmatica	EU713386.1		Campanula speciosa	LT673990.1	isolate CAM288	Siphocampylus brevicalyx	KP014896.1	isolate LL178				Campanula thyrsoides	LT706769.1	isolate CAM103	Campanula propinqua	EF088749.1	isolate CR57
Codonopsis convolvulacea	KC282690.1		Cyphia dentariifolia	NC_036090.1											Campanula sparsa	HQ407549.1	isolate CSPA01	Codonopsis dicentrifolia	KC282736.1					Campanula forsythii	JX915159.1	isolate NC057	Lobelia jasionoides	NC_033369.1		Campanula saxatilis	EU713349.1		Campanula spicata	LT673922.1	isolate CAM053	Siphocampylus chloroleucus	KP014903.1	isolate 100				Campanula tomentosa	LT706565.1	isolate CAM023	Campanula ptarmicifolia var. capitellata	EF088775.1	isolate CR83
Codonopsis convolvulacea var. efilamentosa	KC282692.1		Cyphia elata var. gerrardii	MF770627.1											Campanula sparsa subsp. sphaerothrix	MK652040.1	isolate BOP104664	Codonopsis farreri	KT970203.1					Campanula fragilis	FN397011.1	isolate CAM099	Lobelia kauaensis	DQ272704.1		Campanula scabrella	JN571983.1	RM408150	Campanula stellaris	LT673967.1	isolate CAM198	Siphocampylus clotho	KU670686.1	isolate LL245				Campanula topaliana subsp. delphica	LT706637.1	isolate CAM221	Campanula ptarmicifolia var. ptarmicifolia	EF088750.1	isolate CR58
Codonopsis cordifolioidea	KF366730.1	26972	Cyphia glandulifera	MF770628.1											Campanula speciosa	MK652038.1	isolate BOP104662	Codonopsis foetens	KC282738.1					Campanula fruticulosa	JX914856.1	isolate CAM336	Lobelia laxa	NC_036074.1		Campanula scheuchzeri	KF602098.1		Campanula stevenii	LT674094.1	isolate CAM372	Siphocampylus convolvulaceus	KP014907.1	isolate 101				Campanula trachelium	LT706592.1	isolate CAM083	Campanula pterocaula	EF088751.1	isolate CR59
Codonopsis deltoidea	KF366732.1	H12086	Cyphia phyteuma	MF770629.1											Campanula specularioides	FM212705.1	isolate CS01ITS	Codonopsis foetens subsp. nervosa	KF366778.1	H11042				Campanula garganica	JX915171.1	isolate NC3192	Lobelia laxiflora	NC_033370.1		Campanula sclerotricha	FJ587276.1		Campanula stevenii subsp. alberti	LT674068.1	isolate CAM567	Siphocampylus correoides	KP014967.1	isolate 103				Campanula tristis	LT706680.1	isolate CAM506	Campanula pubicalyx	EF088752.1	isolate CR60
Codonopsis dicentrifolia	KC282691.1		Cyphia schlechteri	MF770630.1											Campanula spicata	DQ304574.1		Codonopsis forrestii	KC282739.1					Campanula gieseckeana	JX914748.1	isolate CAM210	Lobelia leschenaultiana	KT957613.1	C. Skottsberg s.n. (GB)	Campanula scoparia	FJ587277.1		Campanula stevenii subsp. beauverdiana	LT674093.1	isolate CAM371	Siphocampylus corymbifer	KP014942.1	isolate LL91				Campanula troegerae	LT706712.1	isolate CAM780	Campanula punctata	HQ704652.1	Yoo75339
Codonopsis farreri	KT970130.1		Cyphia tortilis	MF770631.1											Campanula stenocodon	DQ304620.1		Codonopsis gongshanica	KM675825.1	BOP018421(A)				Campanula glomerata	JX914719.1	isolate CAM178	Lobelia linearis	NC_036075.1		Campanula scouleri	JN571985.1	WWB22739	Campanula stricta	LT673951.1	isolate CAM151	Siphocampylus corynoides	KP014910.1	isolate LL175				Campanula turczaninovii	LT706587.1	isolate CAM074	Campanula pyramidalis	EF088754.1	isolate CR62
Codonopsis foetens	KC282693.1		Delissea rhytidosperma	KY354214.1											Campanula stevenii	DQ304591.1		Codonopsis graminifolia	KC435388.1	H10028				Campanula glomerata subsp. caucasica	JX915012.1	isolate CAM541	Lobelia longisepala	NC_033371.1		Campanula semisecta	FJ587278.1		Campanula strigosa	LT674052.1	isolate CAM760	Siphocampylus dependens	KP015000.1	isolate LL156				Campanula tymphaea	LT706719.1	isolate CAM462	Campanula quercetorum	EF088755.1	isolate CR63
Codonopsis foetens subsp. nervosa	KF366744.1	H11042	Delissea subcordata	DQ285264.1											Campanula stevenii subsp. alberti	MK652079.1	isolate BOP205678	Codonopsis grey-wilsonii	KC435389.1	1500				Campanula glomerata subsp. hispida	JX915013.1	isolate CAM542	Lobelia lukwangulensis	NC_035376.1		Campanula sibirica	FJ587279.1		Campanula suanetica	LT674032.1	isolate CAM568	Siphocampylus domingensis	KP014787.1	isolate 107				Campanula uniflora	KC455768.1	WU:C. Brochmann & A.C. Sheen 7090	Campanula raddeana	JX445912.1
Codonopsis forrestii	KC282694.1		Dialypetalum floribundum	MF061169.1											Campanula stevenii subsp. altaica	MK652080.1	isolate BOP205681	Codonopsis henryi	KT970204.1					Campanula glomerata subsp. oblongifolioides	JX915014.1	isolate CAM543	Lobelia melliana	NC_035377.1		Campanula ramosa	L13861.1		Campanula takesimana	HQ704573.1	KHB090723-016	Siphocampylus elfriedii	KP014813.1	isolate LL185				Campanula uyemurae	LT706750.1	isolate CAM570	Campanula radicosa	EF213151.1	Baden et al. 969
Codonopsis gongshanica	KM675823.1	BOP018421(B)	Diastatea micrantha	MF061170.1											Campanula stevenii subsp. wolgensis	MK652091.1	isolate BOP205717	Codonopsis hirsuta	KC435393.1	H10029				Campanula glomerata subsp. speciosa	JX915015.1	isolate CAM544	Lobelia mildbraedii	NC_035378.1		Campanula spathulata subsp. filicaulis	EU713444.1		Campanula takhtadzhianii	LT673995.1	isolate CAM300	Siphocampylus fiebrigii	KP014900.1	isolate LL113				Campanula veneris	LT706640.1	isolate CAM230	Campanula radula	MK556549.1	BOP104624
Codonopsis graminifolia	KC435373.1	H10025	Downingia elegans	MF061172.1											Campanula takesimana	KP159318.1	isolate TKM201458	Codonopsis inflata	KY070925.1	isolate BOP018128-1				Campanula glomerata var. cordifolia	JX914757.1	isolate CAM220	Lobelia morogoroensis	NC_033372.1		Campanula speciosa	FJ587280.1		Campanula telephioides	LT673998.1	isolate CAM376	Siphocampylus flagelliformis	KP014888.1	isolate LL92				Campanula versicolor	LT706742.1	isolate CAM886	Campanula rapunculoides	EF088757.1	isolate CR65
Codonopsis grey-wilsonii	KC435375.1	1500	Echinocodon lobophyllus	MH029157.1											Campanula teutana	KF957742.1	isolate Ct5	Codonopsis javanica	KF366773.1	258				Campanula glomerata var. dahurica	KT970328.1		Lobelia muscoides	MF061201.1		Campanula spicata	FJ587281.1		Campanula teucrioides	LT674009.1	isolate CAM377	Siphocampylus fulgens	KP015014.1	isolate 112				Campanula xylopoda	LT706697.1	isolate CAM634	Campanula rapunculus	EF088758.1	isolate CR66
Codonopsis henryi	KT970131.1		Edraianthus australis	EF213369.1	Gustavsson 9693, C										Campanula thyrsoides	MK652043.1	isolate BOP104668	Codonopsis javanica subsp. japonica	KC282734.1					Campanula goulimyi	JX914932.1	isolate CAM413	Lobelia nicotianifolia	KT957615.1	M. Strong Clemens 917 (GH)	Campanula stenocodon	KJ512650.1		Campanula thessala	LT673946.1	isolate CAM129	Siphocampylus giganteus	KP015002.1	isolate 114				Campanula yildirimlii	LT706666.1	isolate CAM380	Campanula reatina	FJ426589.1
Codonopsis hirsuta	KC282696.1		Edraianthus dalmaticus	EF213390.1	Hilda Ritter s.n.										Campanula thyrsoides subsp. carniolica	DQ304575.1		Codonopsis kawakamii	KF366774.1	151-198				Campanula grandis subsp. rizeensis	JX914858.1	isolate CAM338	Lobelia niihauensis	NC_035380.1		Campanula stevenii	FJ587282.1		Campanula thyrsoides	LT673938.1	isolate CAM103	Siphocampylus igneus	KP014788.1	isolate 116				Campanula zangezura	LT706690.1	isolate CAM576	Campanula rhomboidalis	KJ512689.1	isolate Seq35
Codonopsis inflata	KT970126.1		Edraianthus dinaricus	EF213391.1	E. Janchen 3083										Campanula tommasiniana	DQ304611.1		Codonopsis lanceolata	EU713248.1	Eddie 95023 (EGHB)				Campanula griffinii	JX914838.1	isolate CAM315	Lobelia nubigena	KT957617.1	L.Y. Chen & G.W. Hu 034 (HIB, M)	Campanula stevenii subsp. wolgensis	MK555421.1	BOP205717	Campanula tomentosa	LT673902.1	isolate CAM023	Siphocampylus imbricatus	KU670679.1	isolate LL269				Carpodetus serratus	MF770619.1		Campanula rotata	MK556601.1	BOP222018
Codonopsis javanica	KT970125.1		Edraianthus glisicii	EF213395.1	K24257										Campanula trachelium	KY009447.1	isolate CWS3	Codonopsis limprichtii	KY070964.1	isolate BOP018032				Campanula grossheimii	FN397013.1	isolate CAM029	Lobelia organensis	NC_035382.1		Campanula stricta	FJ587283.1		Campanula topaliana subsp. delphica	LT673979.1	isolate CAM221	Siphocampylus jelskii	KP014956.1	isolate LL159				Centropogon granulosus	MF061166.1		Campanula rotundifolia	EF088759.1	isolate CR67
Codonopsis javanica subsp. japonica	KC282685.1		Edraianthus graminifolius	EF213407.1	Stevanovic & Lakusic 20944, BEOU collection-date 18-Jul-2006 note infrasp. 'baldaccii' Lakusic 1974 (nom. nud.)										Campanula transtagana	FM212780.1	isolate CT06ITS	Codonopsis micrantha	KC282725.1					Campanula guinochetii	KJ910747.1	Montes A10468	Lobelia paludosa	MH464311.1	Abbott 23113	Campanula subcapitata	FJ587284.1		Campanula trachelium	LT673932.1	isolate CAM083	Siphocampylus krauseanus	KU670678.1	isolate LL250				Centropogon nigricans	KY045478.1	Muchhala 118	Campanula sarmatica	GQ254921.1	isolate 1263
Codonopsis kawakamii	EU437588.1		Edraianthus hercegovinus	EF213478.1	Ivan Santarius s.n.										Campanula uniflora	DQ304588.1		Codonopsis minima	KT970206.1					Campanula hagielia	JX914847.1	isolate CAM326	Lobelia patula	NC_036077.1		Campanula takesimana	KC146523.1	KHB090723-016	Campanula tristis	LT674024.1	isolate CAM506	Siphocampylus longepedunculatus	KP014905.1	isolate 121				Clermontia fauriei	NC_035355.1		Campanula sauvagei	KJ910707.1	Montes A9701
Codonopsis lanceolata	KY368983.1	H.J.Kim8711	Edraianthus horvatii	EF213483.1	Tomovic & Niketic 20963										Campanula uralensis	MK652045.1	isolate BOP104680	Codonopsis nervosa	JN851164.1					Campanula hakkiarica	JX915055.1	isolate CAM586	Lobelia petiolata	DQ272717.1		Campanula thyrsoides	EU643723.1		Campanula troegerae	LT674056.1	isolate CAM780	Siphocampylus lycioides	KP014808.1	isolate 122				Codonopsis lanceolata	MH018574.1		Campanula savalanica	EF088760.1	isolate CR68
Codonopsis meleagris	KF366743.1	869-397	Edraianthus niveus	EF213485.1	Cedomil Silic s.n.										Campanula vaillantii	KM042170.1	A9579	Codonopsis ovata	KC282726.1					Campanula hawkinsiana	JX914939.1	isolate CAM420	Lobelia physaloides	MF770620.1		Campanula trachelium	FJ587285.1		Campanula turczaninovii	LT673927.1	isolate CAM074	Siphocampylus macropodus	KP014890.1	isolate 123				Codonopsis meleagris	LT706743.1	isolate CAM889	Campanula saxifraga	EF213155.1	SS-05-166
Codonopsis micrantha	KC282699.1		Edraianthus owerinianus	EF213486.1	Radzki s.n.										Campanula velata	KM042171.1	Molero JMM9579	Codonopsis parviflora	KY070993.1	isolate PT-0368				Campanula hedgei	JX914859.1	isolate CAM339	Lobelia pleotricha	KT957618.1	T. Zhang et al. 10CS2108 (KUN)	Campanula tubulosa	EU713352.1		Campanula tymphaea	LT674067.1	isolate CAM462	Siphocampylus manettiiflorus	KP014786.1	isolate LL48				Codonopsis minima	NC_036311.1		Campanula saxifraga subsp. aucheri	EF088761.1	isolate CR69
Codonopsis minima	KT970133.1		Edraianthus parnassicus	EF213487.1	Horandl et al. 7584										Campanula versicolor	KC181055.1	isolate #415 clone 2	Codonopsis pilosula	KC146485.1	Yoo75340				Campanula herminii	JX915120.1	isolate 17T	Lobelia puberula	MF770611.1		Campanula uniflora	JN571986.1	UAM:Herb:39807	Campanula uniflora	LT674061.1	isolate CAM569	Siphocampylus matthiaei	KP014891.1	isolate 124				Cyananthus lobatus	LT706559.1	isolate CAM065	Campanula saxifragoides	KJ910708.1	A9539
Codonopsis nervosa	JN851155.1		Edraianthus pumilio	EF213492.1	Solic & Siljak-Yakovlev s.n.										Campanula waldsteiniana	DQ304610.1		Codonopsis pilosula subsp. handeliana	KF366771.1	H10017				Campanula heterophylla	JX914716.1	isolate CAM175	Lobelia rhynchopetalum	NC_035384.1		Campanula versicolor	KJ512652.1		Campanula uyemurae	LT674069.1	isolate CAM570	Siphocampylus membranaceus	KP014885.1	isolate LL115				Cyanea fissa	KY354213.1		Campanula scheuchzeri	MK556552.1	BOP104650
Codonopsis ovata	KC282700.1		Edraianthus serbicus	EF213494.1	Stevanovic s.n.										Campanula wanneri	JX987517.1	H1482964	Codonopsis pilosula subsp. tangshen	KY070889.1	isolate BOP018187-2				Campanula hierapetrae	FN397014.1	isolate CAM124	Lobelia ritabeaniana	NC_035385.1		Campanula vidalii	HM849843.1		Campanula veneris	LT673982.1	isolate CAM230	Siphocampylus nematosepalus	KP014952.1	isolate LL30				Cyanea leptostegia	MF061168.1		Campanula sclerotricha	EF088763.1	isolate CR71
Codonopsis pilosula	AJ236202.1		Edraianthus serbicus subsp. stankovicii	EF213501.1	N.B. 1545/91										Campanula witasekiana	MK652083.1	isolate BOP205695	Codonopsis purpurea	KC282744.1					Campanula hierosolymitana	JX914811.1	isolate CAM285	Lobelia sancta	NC_035386.1		Campanula wanneri	KJ689363.1	H1482964	Campanula versicolor	LT674106.1	isolate CAM886	Siphocampylus nemoralis	KP014944.1	isolate LL116				Cyphia angustiloba	MF770621.1		Campanula scoparia	EF088764.1	isolate CR72
Codonopsis pilosula subsp. handeliana	KF366735.1	H10017	Edraianthus serpyllifolius	EF213518.1	Stevanovic 19955 note infrasp. 'sutjeskae' Lakusic 1974 (nom. nud.)										Campanula zangezura	JX987518.1	H1733327	Codonopsis rosulata	KC282745.1					Campanula hispanica	JX914745.1	isolate CAM206	Lobelia seguinii	KT957619.1	1L.Y. Chen & S.Y. Zhao S315 (HIB, M)	Campanula wilkinsiana	JN571987.1	WWB22740	Campanula xylopoda	LT674041.1	isolate CAM634	Siphocampylus neurotrichus	KP014889.1	isolate LL117				Cyphia banksiana	MF770622.1		Campanula scutellata	EF088765.1	isolate CR73
Codonopsis pilosula subsp. tangshen	JN851156.1		Edraianthus siculus	EF213520.1	Raimondo et al. (III Iter Mediterraneum 2055)										Campanula zoysii	DQ304603.1		Codonopsis sp.	MF786814.1	US:3540423				Campanula hofmannii	KJ512609.1	isolate Seq13	Lobelia sessilifolia	NC_035388.1		Campanula witasekiana	KJ512653.1		Campanula yildirimlii	LT674010.1	isolate CAM380	Siphocampylus oblongifolius	KP014886.1	isolate LL114				Cyphia belfastica	MF770623.1		Campanula secundiflora	GQ254922.1	isolate C220
Codonopsis purpurea	KC282702.1		Edraianthus tarae	EF213524.1	Lakusic 20896										Campanumoea lancifolia	EF206701.1		Codonopsis subglobosa	KC282746.1					Campanula hohenackeri	JX914888.1	isolate CAM368	Lobelia siphilitica var. siphilitica	KY354225.1		Campanula zangezura	KJ689364.1	H733327	Campanula zangezura	LT674034.1	isolate CAM576	Siphocampylus orbignianus	KP014807.1	isolate LL93				Cyphia bulbosa var. bulbosa	MF770624.1		Campanula semisecta	EF088766.1	isolate CR74
Codonopsis rosulata	KC282703.1		Edraianthus tenuifolius	EF213527.1	Lakusic et al. 456/89										Canarina abyssinica	KP761425.1	isolate aby05_Bir	Codonopsis subscaposa	KC282727.1					Campanula humillima	JX915056.1	isolate CAM587	Lobelia siphilitica	DQ006198.1	Beyersdorfer 185 US	Canarina canariensis	DQ356115.1		Carpodetus serratus	MF770619.1		Siphocampylus puberulus	KP014964.1	isolate LL118				Cyphia crenata	NC_036089.1		Campanula seraglio	EF213156.1	SS-04-17
Codonopsis subglobosa	KC282704.1		Edraianthus wettsteinii	EF213538.1	Medjedovic & Siljak-Yakovlev s.n.										Canarina canariensis	KP761435.1	isolate c21_LPA_Cg	Codonopsis subsimplex	KF366781.1	20915092				Campanula hypocrateriformis	KJ910748.1	A6967	Lobelia sonderiana	NC_036079.1		Carpodetus serratus	Y08461.1		Centropogon granulosus	MF061166.1		Siphocampylus rosmarinifolius	KP014909.1	isolate LL162				Cyphia dentariifolia	NC_036090.1		Campanula serhouchenensis	KJ910712.1	A9526
Codonopsis subscaposa	KC282705.1		Edraianthus wettsteinii subsp. lovcenicus	EF213539.1	SS-05-212										Canarina eminii	KP761451.1	isolate e02_Dem	Codonopsis thalictrifolia	KF366785.1	H10008				Campanula hypopolia	FN397016.1	isolate CAM041	Lobelia spicata	NC_036080.1		Centropogon aequatorialis	EF174622.1	Muchhala 131	Centropogon gutierrezii	DQ285126.1		Siphocampylus rusbyanus	KP015012.1	isolate LL52				Cyphia elata var. gerrardii	MF770627.1		Campanula sibirica	KC792341.1	G127
Codonopsis subsimplex	KF366746.1	20915092	Githopsis pulchella	MK556025.1	BOP104846										Carpodetus serratus	DQ499090.1		Codonopsis tsinlingensis	KF366788.1	1646250				Campanula iconia	JX914860.1	isolate CAM340	Lobelia stricklandiae	NC_033374.1		Centropogon argutus	KU670756.1	isolate LL243	Centropogon nigricans	KY045478.1	Muchhala 118	Siphocampylus scandens	KP014973.1	isolate 131				Cyphia glandulifera	MF770628.1		Campanula sibirica subsp. divergens	MK556587.1	BOP205690
Codonopsis thalictrifolia	KC282706.1		Githopsis specularioides	MK556026.1	BOP104847										Centropogon sp.	LN899773.1	1 MK-2015, isolate ED1195	Codonopsis tubulosa	KT970207.1					Campanula immodesta	KT970343.1		Lobelia stuhlmannii	NC_035389.1		Centropogon baezanus	EF174612.1	Muchhala 162	Clermontia arborescens	DQ285102.1		Siphocampylus sceptrum	KP015009.1	isolate 132				Cyphia phyteuma	MF770629.1		Campanula siegizmundii	JX445916.1
Codonopsis tsinlingensis	KF366752.1	1646248	Grammatotheca bergiana	MF770632.1											Clermontia arborescens subsp. waihiae	JX500337.1		Codonopsis ussuriensis	KC146486.1	Yoo56567				Campanula incanescens	JX915010.1	isolate CAM539	Lobelia telekii	KU238156.1	L.Y. Chen et al. S109 (M)	Centropogon brittonianus	KU670757.1	isolate LL83	Clermontia fauriei	DQ285103.1		Siphocampylus smilax	KP014908.1	isolate LL95				Cyphia schlechteri	MF770630.1		Campanula skanderbegii	KF957772.1	isolate Cs21
Codonopsis tubulosa	KT970134.1		Hanabusaya asiatica	HQ704460.1	Yoo75337										Clermontia calophylla	KM382192.1	isolate C151	Codonopsis vinciflora	KC435397.1	H11013				Campanula incurva	JX914822.1	isolate CAM297	Lobelia thapsoidea	KU238157.1	M. Aparecida da Silva & D. Alvarenga 4255 (MO)	Centropogon coccineus	KU670771.1	isolate LL8	Clermontia kakeana	DQ285104.1		Siphocampylus sonchifolius	KP014789.1	isolate 134				Cyphia tortilis	MF770631.1		Campanula sp.	KM215789.1	IR-2014
Codonopsis ussuriensis	KC146446.1	Yoo56567	Heterocodon rariflorum	MK556024.1	BOP104823										Clermontia clermontioides subsp. clermontoides	KM382194.1	isolate C152	Codonopsis viridiflora	KT970208.1					Campanula involucrata	JX914714.1	isolate CAM172	Lobelia thermalis	NC_036081.1		Centropogon comosus	EF174630.1	Luteyn et al. 15078	Clermontia parviflora	DQ285132.1		Siphocampylus sp.	KP015010.1	LPL-2014a isolate LL164				Delissea rhytidosperma	KY354214.1		Campanula sparsa subsp. sphaerotrix	EF213159.1	SS-05-175
Codonopsis vinciflora	KC435382.1	H11012	Himalacodon dicentrifolius	KP318300.1	G308447										Clermontia fauriei	JX500338.1	Johansen 1	Codonopsis viridis	KF366792.1	4962				Campanula isaurica	JX914713.1	isolate CAM171	Lobelia thuliniana	NC_033375.1		Centropogon cornutus	DQ356158.1		Codonopsis affinis	KP318183.1	HUH359211	Siphocampylus sparsipilus	KP014938.1	isolate 139				Dialypetalum floribundum	MF061169.1		Campanula spatulata	KJ512694.1	isolate 2
Codonopsis viridiflora	KF366754.1	H12093	Hippobroma longiflora	MF061173.1											Clermontia grandiflora subsp. grandiflora	KM382189.1	isolate C32	Corokia cotoneaster	AY491646.1					Campanula isophylla	FN397018.1	isolate CAM127	Lobelia udzungwensis	NC_035392.1		Centropogon costaricae	KU670774.1	isolate LL2	Codonopsis argentea	KP318184.1	NY627	Siphocampylus tunarensis	KP014975.1	isolate LL97				Diastatea micrantha	MF061170.1		Campanula speciosa	EF088768.1	isolate CR76
Codonopsis viridis	EU437584.1		Hypsela tridens	MF061174.1											Clermontia hawaiiensis	KM382202.1	isolate C207	Craterocapsa tarsodes	EU713301.1	Eddie 01022 (EGHB)				Campanula jacobaea	KC792337.1	A9503	Lobelia urens	NC_035393.1		Centropogon dianae	KU670769.1	isolate LL195	Codonopsis benthamii	KP318185.1	HUH359209	Siphocampylus tunicatus	KP014991.1	isolate LL98				Downingia cuspidata	MF061171.1		Campanula spicata	EF088769.1	isolate CR77
Corokia cotoneaster	AJ235445.2		Isotoma axillaris	DQ285283.1											Clermontia kakeana	KM382204.1	isolate C252	Cuttsia viburnea	GQ983640.1					Campanula jacquinii	JX914935.1	isolate CAM416	Lobelia villosa	DQ272730.1		Centropogon dissectus	EF141026.1	Luteyn et al. 5678(GB)	Codonopsis bulleyana	KP318214.1	KWNU89896	Siphocampylus tupaeformis	KP014963.1	isolate LL99				Downingia elegans	MF061172.1		Campanula stenocodon	KJ512697.1	isolate Seq43
Craterocapsa tarsodes	EU437636.1		Isotoma fluviatilis subsp. fluviatilis	KR028360.1	NSW:734728										Clermontia kohalae	KM382195.1	isolate C5	Cyananthus cordifolius	KC880526.1	Nie 1019 (KUN)				Campanula kadargavanica	JX915017.1	isolate CAM546	Lobelia vivaldii	DQ272721.1		Centropogon featherstonei	KU670758.1	isolate LL158	Codonopsis canescens	KP318187.1	HUH359225	Siphocampylus umbellatus	KP014993.1	isolate 145				Echinocodon lobophyllus	MH029157.1		Campanula stevenii subsp. alberti	MK556584.1	BOP205678
Cuttsia viburnea	AJ318969.1		Isotoma hypocrateriformis	MF061176.1	isolate K5274										Clermontia lindseyana	KM382205.1	isolate C310	Cyananthus delavayi	KC880532.1	SunH 07ZX 2456 (KUN)				Campanula karakuschensis	JX915046.1	isolate CAM577	Lobelia wollastonii	NC_035394.1		Centropogon ferrugineus	KU670759.1	isolate LL1	Codonopsis chimiliensis	KP318188.1	US1378070	Siphocampylus vatkeanus	KP014817.1	isolate LL53				Edraianthus tenuifolius	LT706599.1	isolate CAM117	Campanula stevenii subsp. stevenii	EF088770.1	isolate CR78
Cyananthus cordifolius	KC880704.1	Nie 1019 (KUN)	Isotoma tridens	NC_035362.1											Clermontia micrantha	KM382190.1	isolate C46	Cyananthus dolichosceles	KC880535.1	SunH SC11103 (KUN)				Campanula keniensis	JX915070.1	isolate CAM601	Lobelia yuccoides	MF061221.1		Centropogon gamosepalus	DQ356157.1		Codonopsis chlorocodon	KP318189.1	NY28739	Siphocampylus veteranus	KP014815.1	isolate LL186				Githopsis diffusa	LT706747.1	isolate CAM422	Campanula stricta	EF088771.1	isolate CR79
Cyananthus delavayi	KC282709.1		Jasione heldreichii	MK556033.1	BOP162097										Clermontia montis-loa	KM382201.1	isolate C158	Cyananthus flavus subsp. flavus	KC880537.1	SunH SC11072 (KUN)				Campanula kermanica	JX915059.1	isolate CAM590	Monopsis alba	NC_036082.1		Centropogon glabrifilis	EF174627.1	Muchhala 152	Codonopsis clematidea	KP318190.1	JE5398	Siphocampylus virgatus	KP014958.1	isolate LL167				Githopsis pulchella	LT706748.1	isolate CAM423	Campanula strigosa	EF088772.1	isolate CR80
Cyananthus flavus subsp. montanus	KC880705.1	SunH SC0024 (KUN)	Jasione montana	MK556034.1	BOP162099										Clermontia oblongifolia subsp. oblongifolia	KM382184.1	isolate C299	Cyananthus flavus subsp. montanus	KC880538.1	SunH SC0024 (KUN)				Campanula khorasanica	JX915060.1	isolate CAM591	Monopsis debilis var. debilis	MF770616.1		Centropogon gloriosus	KU670761.1	isolate LL84	Codonopsis convolvulacea	KP318208.1	HUH359224	Siphocampylus werdermannii	KP014893.1	isolate LL101				Githopsis specularioides	LT706746.1	isolate CAM421	Campanula subcapitata	EF088773.1	isolate CR81
Cyananthus formosus	KC282710.1		Legenere valdiviana	NC_035364.1											Clermontia pallida	KM382188.1	isolate C248	Cyananthus formosus	KC282750.1					Campanula kirikkoleensis	JX914861.1	isolate CAM341	Monopsis flava	MF770617.1		Centropogon grandidentatus	EF174625.1	UCBG 810952	Codonopsis convolvulacea subsp. forrestii	KP318210.1	US3043512	Siphocampylus westinianus	KP014906.1	isolate 150				Grammatotheca bergiana	MF770632.1		Campanula takesimana	HQ704653.1	KHB090723-016
Cyananthus hookeri	KT970136.1		Lithotoma petraea	NC_033365.1											Clermontia parviflora	KM382196.1	isolate C11	Cyananthus hookeri	KC880543.1	SunH 07ZX 2271 (KUN)				Campanula kolenatiana	FN397020.1	isolate CAM030	Monopsis stellarioides subsp. schimperiana	MF770618.1		Centropogon granulosus	MF061166.1		Codonopsis convolvulacea subsp. vinciflora	KP318209.1	S13-6898	Solenopsis bivonae	MF061224.1					Hanabusaya asiatica	KJ477692.1	Yoo86859	Campanula teutana	KF957750.1	isolate Ct13
Cyananthus incanus subsp. incanus	KC880708.1	Nie 858 (KUN)	Lobelia aberdarica	NC_035365.1											Clermontia peleana	KM382187.1	isolate C193	Cyananthus incanus	JF953610.1	NieZL-1045				Campanula komarovii	JX915018.1	isolate CAM547	Musschia aurea	KY091503.1	AZB:MF-MDCM-003	Centropogon granulosus subsp. granulosus	EF174611.1	MBG 894806	Codonopsis efilamentosa	KP318211.1	US1213698	Trematolobelia kauaiensis	NC_035398.1					Hippobroma longiflora	MF061173.1		Campanula tommasiniana	FJ426590.1
Cyananthus inflatus	KT970137.1		Lobelia acrochila	NC_035366.1											Clermontia persicifolia	KM382185.1	isolate C287	Cyananthus incanus subsp. incanus	KC880550.1	SunH SC0059 (KUN)				Campanula koyuncui	JX914862.1	isolate CAM342	Musschia wollastonii	KY091510.1	AZB:MW-MDET-021	Centropogon granulosus subsp. nutans	EF174610.1	Muchhala 138	Codonopsis cordifolioidea	KP318191.1	MBK29302	Wimmerella hederacea	NC_033377.1					Hypsela tridens	MF061174.1		Campanula trachelium	EF088774.1	isolate CR82
Cyananthus lichiangensis	KC880712.1	SunH SC11104 (KUN)	Lobelia anceps	NC_033366.1											Clermontia pyrularia	KM382199.1	isolate C192	Cyananthus incanus subsp. petiolatus	KC880554.1	SunH SC11215 (KUN)				Campanula kremeri	KJ910753.1	A11112	Ostrowskia magnifica	KM675897.1	826	Centropogon gutierrezii	AF042658.1		Codonopsis farreri	KP318193.1	US3514514							Isotoma hypocrateriformis	MF061176.1	isolate K5274	Campanula tridentata	EF213160.1	SS-04-11
Cyananthus lobatus	EU437587.1		Lobelia bambuseti	MF061181.1											Clermontia samuelii subsp. samuelii	KM382191.1	isolate C311	Cyananthus inflatus	KC880562.1	ZhouZ 001 (KUN)				Campanula kryophila	JX915021.1	isolate CAM550	Palmerella debilis subsp. serrata	MF061222.1		Centropogon hirtus	KU670762.1	isolate LL247	Codonopsis foetens subsp. nervosa	KP318195.1	HUH359220							Isotoma tridens	NC_035362.1		Campanula turczaninovii	MK556559.1	BOP104677
Cyananthus longiflorus	KC282715.1		Lobelia baumannii	MF770633.1											Clermontia singuliflora	KM382193.1	isolate C195	Cyananthus lichiangensis	KC880566.1	SunH SC11193 (KUN)				Campanula laciniata	JX914741.1	isolate CAM202	Pankycodon purpureus	KY070810.1	isolate BOP018002-2	Centropogon leucocarpus	KU670763.1	isolate LL127	Codonopsis javanica	KP318207.1	US3525946							Jasione heldreichii	LT706774.1	isolate CAM419	Campanula tymphaea	EF213161.1	Strid et al. 30314
Cyananthus macrocalyx	KC880715.1	SunH SC11162 (KUN)	Lobelia bequaertii	MF061182.1											Clermontia tuberculata	KM382186.1	isolate C68	Cyananthus lobatus	EU713252.1	Cosner 179 (OS)				Campanula lactiflora	JX915131.1	isolate 36T	Petromarula pinnata	MH749227.1	US:Suissa160	Centropogon llanganatensis	EF174626.1	Muchhala 139	Codonopsis kawakamii	KP318196.1	US3241228							Legenere valdiviana	NC_035364.1		Campanula uniflora	KC455653.1	WU:C. Brochmann & A.C. Sheen 7090
Cyananthus pedunculatus	KT970140.1		Lobelia boninensis	KY354217.1											Clermontia waimeae	KM382197.1	isolate C109	Cyananthus longiflorus	KC880570.1	SunH 07ZX 2357 (KUN)				Campanula lamondiae	JX914959.1	isolate CAM474	Physoplexis comosa	HG800551.1	MIB:ZPL:07317	Centropogon luteus	DQ356151.1		Codonopsis lanceolata	HQ704574.1	Yoo62006							Legousia falcata	LT706753.1	isolate CAM281	Campanula vaillantii	KJ910713.1	A9579
Cyananthus sericeus	KC880718.1	Nie 822 (KUN)	Lobelia burttii subsp. burttii	MF061183.1											Codonopsis affinis	KP318219.1	HUH359211	Cyananthus macrocalyx	KC880571.1	SunH SC0058 (KUN)				Campanula lanata	JX915121.1	isolate 18T	Phyteuma betonicifolium	HG800552.1	MIB:ZPL:03442	Centropogon luteynii	KU670764.1	isolate LL125	Codonopsis meleagris	LT674107.1	isolate CAM889							Lithotoma petraea	NC_033365.1		Campanula velata	KJ910715.1	Molero s.n.
Cyananthus sherriffii	KC880719.1	Nie 1050 (KUN)	Lobelia burttii subsp. meruensis	MF061184.1											Codonopsis alpina	KY071014.1	isolate BOP018424-2	Cyananthus microphyllus	KC880574.1	Nie 968 (KUN)				Campanula langsdorffiana	JX914832.1	isolate CAM308	Phyteuma ovatum	HG800553.1	MIB:ZPL:03524	Centropogon medusa	EF174628.1	Muchhala 174	Codonopsis minima	KP318218.1	KWNU89891							Lobelia aberdarica	KT710161.1	LY Chen S140 (M)	Campanula versicolor	FJ426591.1
Cyanea fissa	KY354213.1		Lobelia burttii subsp. telmaticola	MF061185.1											Codonopsis argentea	KP318220.1	NY627	Cyananthus pedunculatus	KT970214.1					Campanula lasiocarpa	JX915218.1	isolate NC3372	Phyteuma scheuchzeri	HG800554.1	MIB:ZPL:03505	Centropogon nigricans	EF174631.1	Muchhala 118	Codonopsis ovata	KP318197.1	US1609608							Lobelia acrochila	NC_035366.1		Campanula waldsteiniana	EF213163.1	SS-04-19
Cyanea leptostegia	MF061168.1		Lobelia cardinalis	NC_036097.1											Codonopsis benthamii	KY071039.1	isolate BOP018419-2	Cyananthus sericeus	KC880576.1	Nie 822 (KUN)				Campanula latifolia	JX914791.1	isolate CAM262	Platycodon grandiflorus	GQ435066.1	PS0583MT02	Centropogon peruvianus	KU670766.1	isolate LL246	Codonopsis pilosula	KP318216.1	KWNU89892							Lobelia anceps	NC_033366.1		Campanula witasekiana	MK556589.1	BOP205695
Cyclocodon celebicus	KC282716.1		Lobelia chinensis	NC_035370.1											Codonopsis bhutanica	KY071026.1	isolate BOP018008-1	Cyananthus sherriffii	KC880577.1	Nie 1050 (KUN)				Campanula lavrensis	JX914958.1	isolate CAM473	Porterella carnosula	KY354228.1		Centropogon pulcher	KU670767.1	isolate LL168	Codonopsis pilosula subsp. handeliana	KP318198.1	S13-6799							Lobelia bambuseti	KT710162.1	SAJIT 002087 (M)	Campanula zangezura	KT970293.1
Cyclocodon lancifolius	KT970141.1		Lobelia columnaris	MF061188.1	isolate Pz3103										Codonopsis bomiensis	KY071043.1	isolate BOP018013	Cyanea asplenifolia	JX500343.1					Campanula ledebouriana	JX914863.1	isolate CAM343	Pratia angulata	MF061180.1		Centropogon rex	KU670768.1	isolate LL207	Codonopsis pilosula subsp. tangshen	KP318199.1	NY186							Lobelia baumannii	MF770633.1		Campanula zoysii	MK556594.1	BOP205720
Cyphia angustiloba	MF770621.1		Lobelia davidii	NC_035372.1											Codonopsis bulleyana	KY071012.1	isolate BOP018026-1	Cyanea fissa	KY354213.1					Campanula legionensis	JX914778.1	isolate CAM246	Pratia nummularia	MF061203.1		Centropogon salviiformis	EF174629.1	Muchhala 173	Codonopsis subscaposa	KP318201.1	S13-6826							Lobelia bequaertii	MF061182.1		Campanulastrum americanum	GQ254928.1	isolate 1287
Cyphia banksiana	MF770622.1		Lobelia deckenii subsp. deckenii	MF061190.1											Codonopsis canescens	KY071046.1	isolate BOP018183-1	Cyanea leptostegia	MF061168.1					Campanula lehmanniana	JX915023.1	isolate CAM552	Pseudocodon convolvulaceus	KM675900.1	BOP018050	Centropogon simulans	KU670770.1	isolate LL248	Codonopsis subsimplex	KP318202.1	US3124878							Lobelia boninensis	KY354217.1		Canarina abyssinica	KP761587.1	isolate aby05_Bir
Cyphia belfastica	MF770623.1		Lobelia deckenii subsp. incipiens	MF061191.1											Codonopsis cardiophylla	KF366874.1	5640	Cyclocodon celebicus	KC282756.1					Campanula lehmanniana subsp. pseudohissarica	JX915024.1	isolate CAM553	Pseudocodon graminifolius	KY070846.1	isolate BOP018052	Centropogon sodiroanus	EF174624.1	Muchhala 117	Codonopsis tubulosa	KP318203.1	US3042833							Lobelia burttii	KT710163.1	SAJIT 002560 (M)	Canarina canariensis	KP761601.1	isolate c21_LPA_Cg
Cyphia bulbosa var. bulbosa	MF770624.1		Lobelia doniana	NC_035373.1											Codonopsis chimiliensis	KP318224.1	US1378070	Cyclocodon lancifolius	KT970211.1					Campanula leucantha	JX915076.1	isolate CAM614	Pseudocodon grey-wilsonii	KM675902.1	1500	Centropogon solanifolius	EF174614.1	Raguso s.n. 3	Codonopsis ussuriensis	HQ704576.1	Yoo56567							Lobelia burttii subsp. burttii	MF061183.1		Canarina eminii	KP761610.1	isolate e03_Yir
Cyphia crenata	NC_036089.1		Lobelia erinus	NC_036098.1											Codonopsis chlorocodon	KY071036.1	isolate BOP018184-3	Cyphia angustiloba	MF770621.1					Campanula leucoclada	JX914957.1	isolate CAM471	Pseudocodon hirsutus	KY070832.1	isolate BOP018062	Centropogon sp.	EF174618.1	UCBG 902279	Codonopsis viridiflora	KP318194.1	HUH359218							Lobelia burttii subsp. meruensis	MF061184.1		Carpodetus serratus	MF770619.1
Cyphia dentariifolia	NC_036090.1		Lobelia excelsa	DQ285276.1											Codonopsis clematidea	HQ010404.1		Cyphia banksiana	MF770622.1					Campanula leucosiphon	JX914864.1	isolate CAM344	Pseudocodon rosulatus	KY070853.1	isolate BOP018033-4	Centropogon tessmannii	EF174619.1	Muchhala 168	Cyananthus lobatus	LT673896.1	isolate CAM065							Lobelia burttii subsp. telmaticola	MF061185.1		Centropogon cornutus	DQ356226.1
Cyphia elata	EU437599.1		Lobelia fervens subsp. fervens	MF770602.1											Codonopsis convolvulacea	KY071102.1	isolate BOP018050-3	Cyphia belfastica	MF770623.1					Campanula lingulata	JX914865.1	isolate CAM345	Pseudocodon vinciflorus	KM675905.1	BOP018045	Centropogon trichodes	KU670780.1	isolate 62	Cyanea acuminata	DQ285105.1								Lobelia cardinalis	NC_036097.1		Centropogon dissectus	DQ356215.1
Cyphia elata var. gerrardii	MF770627.1		Lobelia galpinii	NC_036071.1											Codonopsis convolvulacea subsp. forrestii	KY071100.1	isolate BOP018054	Cyphia bulbosa var. bulbosa	MF770624.1					Campanula longistyla	JX915025.1	isolate CAM554	Sclerotheca forsteri	DQ272724.1		Centropogon vargasii	KU670772.1	isolate LL244	Cyanea coriacea	DQ285106.1								Lobelia chinensis	NC_035370.1		Centropogon gamosepalus	DQ356225.1
Cyphia glandulifera	MF770628.1		Lobelia gibberoa	NC_035374.1											Codonopsis convolvulacea subsp. grey-wilsonii	KY071020.1	isolate BOP018004-2	Cyphia crenata	NC_036089.1					Campanula lourica	JX915062.1	isolate CAM593	Sclerotheca jayorum	DQ272710.1		Centropogon yarumalensis	KU670775.1	isolate LL202	Cyanea floribunda	DQ285134.1								Lobelia columnaris	MF061188.1	isolate Pz3103	Centropogon granulosus	MF061166.1
Cyphia phyteuma	MF770629.1		Lobelia gloria-montis	DQ285265.1											Codonopsis convolvulacea subsp. vinciflora	KY071111.1	isolate BOP018044	Cyphia decora	GQ983652.1					Campanula luristanica	JX915063.1	isolate CAM594	Sclerotheca viridiflora	MF061223.1		Centropogon yungasensis	KU670776.1	isolate LL184	Cyanea hirtella	DQ285136.1								Lobelia davidii	KT710169.1	LY Chen & SY Zhao S314 (M)	Centropogon granulosus subsp. granulosus	DQ356220.1
Cyphia rogersii	AJ318970.1		Lobelia gregoriana subsp. elgonensis	MF061194.1											Codonopsis convolvulacea var. efilamentosa	KY071087.1	isolate BOP018051-4	Cyphia dentariifolia	NC_036090.1					Campanula lusitanica	JX915122.1	isolate 20T	Siphocampylus krauseanus	NC_035760.1	Smith & Leiva 509	Clermontia arborescens	KU670779.1	isolate ICI1	Cyanea kuhihewa	DQ285138.1								Lobelia deckenii	KT710164.1	SAJIT 002147 (M)	Centropogon gutierrezii	DQ285165.1
Cyphia schlechteri	MF770630.1		Lobelia gregoriana subsp. gregoriana	MF061195.1											Codonopsis cordifolioidea	KP318227.1	MBK29302	Cyphia elata	EU713264.1	Cosner s.n. (OS)				Campanula lusitanica subsp. lusitanica	JX914772.1	isolate CAM239	Solenopsis bivonae	MF061224.1		Clermontia arborescens subsp. waihiae	JX500349.1		Cyanea leptostegia	DQ285133.1								Lobelia deckenii subsp. deckenii	MF061190.1		Centropogon luteus	DQ356219.1
Cyphia tortilis	MF770631.1		Lobelia gregoriana subsp. sattimae	KY354218.1											Codonopsis deltoidea	KY071030.1	isolate BOP018195	Cyphia elata var. gerrardii	MF770627.1					Campanula lyrata	JX915185.1	isolate NC3212	Trachelium caeruleum	KY091511.1	AZB:TC-MDFU-001	Clermontia calophylla	JX845911.1	isolate C162	Cyanea pilosa subsp. longipedunculata	DQ285135.1								Lobelia deckenii subsp. incipiens	MF061191.1		Centropogon nigricans	KY045478.1	Muchhala 118
Delissea rhytidosperma	KY354214.1		Lobelia hartlaubii	NC_036072.1											Codonopsis dicentrifolia	KC282652.1		Cyphia glandulifera	MF770628.1					Campanula lyrata subsp. icarica	JX915180.1	isolate NC3205	Trematolobelia kauaiensis	NC_035398.1		Clermontia clermontioides subsp. clermontioides	JX845909.1	isolate C152	Cyclocodon lancifolius	KP318206.1	HUH359222							Lobelia doniana	NC_035373.1		Centropogon trichodes	DQ356217.1
Dialypetalum floribundum	MF061169.1		Lobelia heterophylla subsp. heterophylla	MF770605.1											Codonopsis efilamentosa	KP318247.1	US1213698	Cyphia phyteuma	MF770629.1					Campanula lyrata subsp. lyrata	JX914771.1	isolate CAM238	Trematolobelia macrostachys	DQ272708.1		Clermontia drepanomorpha	JX845916.1	isolate C200	Cyphia angustiloba	MF770621.1								Lobelia erinus	NC_036098.1		Clermontia arborescens	DQ285141.1
Dialypetalum sp.	AJ318972.1	Gustafsson 244	Lobelia holstii	NC_036073.1											Codonopsis farreri	KY071124.1	isolate BOP018199	Cyphia schlechteri	MF770630.1					Campanula macrochlamys	JX914901.1	isolate CAM381	Wahlenbergia marginata	KM675906.1		Clermontia fauriei	NC_035355.1		Cyphia banksiana	MF770622.1								Lobelia fervens subsp. fervens	MF770602.1		Clermontia calophylla	KC460631.1	isolate H_LF
Diastatea micrantha	MF061170.1		Lobelia hypoleuca	DQ285266.1											Codonopsis foetens	KY071010.1	isolate BOP018170-3	Cyphia tortilis	MF770631.1					Campanula macrorhiza	JX914952.1	isolate CAM465	Wahlenbergia sp.	MF785980.1	US:3559084	Clermontia grandiflora subsp. grandiflora	JX845903.1	isolate C32	Cyphia belfastica	MF770623.1								Lobelia galpinii	NC_036071.1		Clermontia clermontioides	KC460632.1	isolate H_LF
Diosphaera rumeliana	EU437619.1		Lobelia inflata	NC_033368.1											Codonopsis foetens subsp. nervosa	KY071058.1	isolate BOP018172-3	Delissea rhytidosperma	KY354214.1					Campanula macrostachya	JX915188.1	isolate NC3219	Wimmerella hederacea	NC_033377.1		Clermontia kakeana	L18789.1		Cyphia bulbosa var. bulbosa	MF770624.1								Lobelia gibberoa	KT710176.1	SAJIT 002561 (M)	Clermontia drepanomorpha	KC460633.1	isolate H_LF
Downingia cuspidata	MF061171.1		Lobelia jasionoides	NC_033369.1											Codonopsis forrestii	KC282655.1		Dialypetalum floribundum	MF061169.1					Campanula macrostyla	JX914814.1	isolate CAM289				Clermontia kohalae	JX845901.1	isolate C5	Cyphia crenata	NC_036089.1								Lobelia gregoriana subsp. elgonensis	MF061194.1		Clermontia fauriei	DQ285142.1
Downingia elegans	MF061172.1		Lobelia kauaensis	MF061196.1											Codonopsis gongshanica	KY071040.1	isolate BOP018421-2	Dialypetalum sp.	GQ983649.1	Koopman et al. s.n.				Campanula makaschvilii	FN397023.1	isolate CAM032				Clermontia lindseyana	JX845917.1	isolate C201	Cyphia dentariifolia	NC_036090.1								Lobelia gregoriana subsp. gregoriana	MF061195.1		Clermontia grandiflora	KC460634.1	isolate L_LF
Echinocodon lobophyllus	MH029157.1		Lobelia laxa	NC_036074.1											Codonopsis graminifolia	KC435414.1	H10013	Diastatea micrantha	MF061170.1					Campanula marchesettii	JX914705.1	isolate CAM163				Clermontia micrantha	JX845904.1	isolate C46	Cyphia elata var. gerrardii	MF770627.1								Lobelia gregoriana subsp. sattimae	KY354218.1		Clermontia hawaiiensis	KC460636.1	isolate H_LF
Edraianthus graminifolius	EU437608.1		Lobelia laxiflora	NC_033370.1											Codonopsis grey-wilsonii	KC435417.1	1500	Diosphaera rumeliana	EU713284.1	Eddie 95405 (EGHB)				Campanula mardinensis	JX914866.1	isolate CAM346				Clermontia montis-loa	JX845907.1	isolate C141	Cyphia glandulifera	MF770628.1								Lobelia hartlaubii	NC_036072.1		Clermontia kakeana	DQ285143.1
Feeria angustifolia	EU437622.1		Lobelia linearis	NC_036075.1											Codonopsis hirsuta	KC282657.1		Downingia cuspidata	MF061171.1					Campanula martinii	KJ512601.1	isolate Seq5				Clermontia oblongifolia subsp. oblongifolia	JX845912.1	isolate C189	Cyphia phyteuma	MF770629.1								Lobelia heterophylla subsp. heterophylla	MF770605.1		Clermontia kohalae	KC460641.1	isolate H_LF
Gadellia lactiflora	EU437652.1		Lobelia longisepala	NC_033371.1											Codonopsis inflata	KY071050.1	isolate BOP018128-2	Downingia elegans	MF061172.1					Campanula massalskyi	JX914972.1	isolate CAM493				Clermontia parviflora	JX845902.1	isolate C11	Cyphia schlechteri	MF770630.1								Lobelia holstii	NC_036073.1		Clermontia lindseyana	KC460643.1	isolate H_LF
Githopsis diffusa	EU437644.1		Lobelia loochooensis	AB645960.1	: TNS:G.Kokubugata7000										Codonopsis javanica	KP318243.1	US3525946	Echinocodon lobophyllus	KC282731.1					Campanula medium	FN397024.1	isolate CAM034				Clermontia peleana	JX845914.1	isolate C193	Cyphia tortilis	MF770631.1								Lobelia inflata	NC_033368.1		Clermontia montis-loa	KC460644.1	isolate H_LF
Githopsis pulchella	EU437647.1		Lobelia lukwangulensis	NC_035376.1											Codonopsis javanica subsp. japonica	KF366883.1	425	Edraianthus graminifolius	KJ512596.1					Campanula mekongensis	JX915091.1	isolate CAM641				Clermontia singuliflora	JX845915.1	isolate C195	Delissea rhytidosperma	DQ285107.1								Lobelia jasionoides	NC_033369.1		Clermontia oblongifolia	KC460645.1	isolate WO_LF
Grammatotheca bergiana	MF770632.1		Lobelia melliana	NC_035377.1											Codonopsis kawakamii	KP318232.1	US3241228	Feeria angustifolia	EU713287.1	Jury et al. 17429 (TEX)				Campanula micrantha	JX914770.1	isolate CAM236				Clermontia tuberculata	JX845905.1	isolate C68	Delissea subcordata	DQ285108.1								Lobelia kauaensis	MF061196.1		Clermontia pallida	KC460646.1	isolate MO_LF
Hanabusaya asiatica	KJ477692.1	Yoo86859	Lobelia mildbraedii	NC_035378.1											Codonopsis lanceolata	KY369032.1	H.J.Kim8684	Gadellia lactiflora	EU713318.1	Eddie 95009 (EGHB)				Campanula mirabilis	JX915123.1	isolate 22T				Clermontia waimeae	JX845906.1	isolate C109	Dialypetalum floribundum	MF061169.1								Lobelia laxa	NC_036074.1		Clermontia parviflora	DQ285171.1
Heterochaenia ensifolia	EU437666.1		Lobelia morogoroensis	NC_033372.1											Codonopsis limprichtii	KY071103.1	isolate BOP018032	Githopsis diffusa	EU713310.1	Morin s.n. (OS)				Campanula moesiaca	JX914769.1	isolate CAM235				Codonopsis affinis	KF366794.1	7855	Echinocodon lobophyllus	MH029157.1								Lobelia laxiflora	NC_033370.1		Clermontia peleana	KC460647.1	isolate H_LF
Heterocodon rariflorum	EU437641.1		Lobelia muscoides	MF061201.1											Codonopsis meleagris	KF366888.1	869-397	Githopsis pulchella	EU713313.1	Morin s.n. (OS)				Campanula mollis	KJ910762.1	A20007				Codonopsis alpina	KF366795.1	28529	Edraianthus tenuifolius	LT673941.1	isolate CAM117							Lobelia linearis	NC_036075.1		Clermontia persicifolia	KC460648.1	isolate EO_LF
Hippobroma longiflora	MF061173.1		Lobelia nicotianifolia	DQ285278.1											Codonopsis micrantha	KC282660.1		Grammatotheca bergiana	MF770632.1					Campanula monodiana	KJ910763.1	A30026				Codonopsis argentea	KT970163.1		Githopsis diffusa	LT674064.1	isolate CAM422							Lobelia longisepala	NC_033371.1		Clermontia pyrularia	KC460650.1	isolate H_LF
Homocodon brevipes	JN851159.1		Lobelia niihauensis	DQ285268.1											Codonopsis minima	KP318254.1	KWNU89891	Hanabusaya asiatica	KC146487.1	Yoo75337				Campanula morettiana	JX915102.1	isolate CAM664				Codonopsis benthamii	KF366797.1	26602	Githopsis pulchella	LT674065.1	isolate CAM423							Lobelia lukwangulensis	NC_035376.1		Clermontia samuelii	KC460651.1	isolate EM_LF
Homocodon pedicellatus	KT970142.1		Lobelia organensis	DQ285279.1											Codonopsis nervosa	AF136237.1		Heterochaenia ensifolia	EU713333.1	Strasberg 12172000 (EGHB)				Campanula myrtifolia	JX914773.1	isolate CAM240				Codonopsis bhutanica	KC282762.1		Githopsis specularioides	LT674063.1	isolate CAM421							Lobelia malowensis	NC_036076.1		Clermontia tuberculata	KC460652.1	isolate EM_LF
Hypsela tridens	MF061174.1		Lobelia patula	NC_036077.1											Codonopsis ovata	KP318233.1	US1609608	Heterocodon rariflorum	JN851167.1					Campanula numidica	KJ910764.1	A19027				Codonopsis bomiensis	KY070638.1	isolate BOP018013	Grammatotheca bergiana	MF770632.1								Lobelia melliana	NC_035377.1		Clermontia waimeae	KC460653.1	isolate H_LF
Isotoma fluviatilis subsp. australis	KR011115.1		Lobelia petiolata	DQ285280.1											Codonopsis pilosula	KF040340.1	YC0094MT06	Himalacodon dicentrifolius	KY070938.1	isolate BOP018003-1				Campanula nuristanica	JX915075.1	isolate CAM613				Codonopsis bulleyana	KC282763.1		Hanabusaya asiatica	HQ704577.1	Yoo75337							Lobelia mildbraedii	NC_035378.1		Codonopsis benthamii	KP761619.1
Isotoma fluviatilis subsp. borealis	KR011114.1		Lobelia physaloides	MF770620.1											Codonopsis pilosula subsp. handeliana	KP318234.1	S13-6799	Hippobroma longiflora	MF061173.1					Campanula occidentalis	KX009166.1	isolate Tenerife_Masca				Codonopsis canescens	KC282792.1		Himalacodon dicentrifolius	KP318192.1	G308447							Lobelia morogoroensis	NC_033372.1		Codonopsis convolvulacea	KF028792.1	A6822_Zhang
Isotoma fluviatilis subsp. fluviatilis	KR011116.1		Lobelia polyphylla	KY354224.1											Codonopsis pilosula subsp. tangshen	AB769283.1	isolate: type T4'	Homocodon brevipes	JN851168.1					Campanula odontosepala	JX914767.1	isolate CAM232				Codonopsis cardiophylla	KF366800.1	5640	Hippobroma longiflora	MF061173.1								Lobelia muscoides	MF061201.1		Codonopsis javanica	KF028791.1	Li4029
Isotoma hypocrateriformis	MF061176.1	isolate K5274	Lobelia puberula	MF770611.1											Codonopsis pilosula var. modesta	AB769278.1	isolate: type PM4	Homocodon pedicellatus	JN851169.1					Campanula oligosperma	JX914766.1	isolate CAM231				Codonopsis chlorocodon	KF366801.1	H12071	Hypsela tridens	MF061174.1								Lobelia niihauensis	NC_035380.1		Codonopsis lanceolata	HQ704654.1	Yoo62006
Isotoma tridens	NC_035362.1		Lobelia rhynchopetalum	NC_035384.1											Codonopsis purpurea	KC282663.1		Hypsela tridens	MF061174.1					Campanula olympica	JX914704.1	isolate CAM162				Codonopsis clematidea	KC282793.1		Isotoma tridens	NC_035362.1								Lobelia nubigena	KT710179.1	LY Chen & GW Hu 034 (HIB,M)	Codonopsis minima	NC_036311.1
Jasione crispa	EU437618.1		Lobelia ritabeaniana	NC_035385.1											Codonopsis rosulata	KC282664.1		Isotoma hypocrateriformis	MF061176.1	isolate K5274				Campanula oreadum	JX914934.1	isolate CAM415				Codonopsis convolvulacea	KC282764.1		Isotoma hypocrateriformis	MF061176.1	isolate K5274							Lobelia organensis	NC_035382.1		Codonopsis pilosula	HQ704655.1	Yoo75340
Jasione heldreichii	EU437616.1		Lobelia sancta	NC_035386.1											Codonopsis rotundifolia	KF366889.1	3797	Isotoma tridens	NC_035362.1					Campanula orphanidea	JX914936.1	isolate CAM417				Pseudocodon convolvulaceus	KP793435.1	Yu 17456	Jasione heldreichii	LT673894.1	isolate CAM419							Lobelia patula	NC_036077.1		Codonopsis ussuriensis	HQ704656.1	Yoo56567
Jasione laevis	EU437615.1		Lobelia seguinii	NC_035387.1											Codonopsis sp.	AB769272.1	isolate: type S0	Jasione crispa	EU713283.1	Eddie 95083 (EGHB)				Campanula ossetica	JX915028.1	isolate CAM558				Pseudocodon convolvulaceus subsp. forrestii	KP793436.1	Cheng 92396	Legousia falcata	LT674079.1	isolate CAM281							Lobelia petiolata	NC_035383.1		Craterocapsa alfredica	KC147783.1	H&B7227 (NU)
Jasione montana	EU437582.1		Lobelia sessilifolia	NC_035388.1											Codonopsis subglobosa	KY071101.1	isolate BOP018031	Jasione heldreichii	EU713281.1	T. Ayers 88-208 (BH)				Campanula pallida	KT970344.1					Codonopsis convolvulacea subsp. forrestii	KY070716.1	isolate BOP018054	Isotoma axillaris	DQ285127.1								Lobelia physaloides	MF770620.1		Craterocapsa congesta	KC147786.1	U16 (J)
Legenere valdiviana	NC_035364.1		Lobelia siphilitica var. siphilitica	KY354225.1											Codonopsis subscaposa	KY071057.1	isolate BOP018185-1	Jasione laevis	EU713280.1	Eddie 95035 (EGHB)				Campanula pallida var. pallida	JX914703.1	isolate CAM161				Codonopsis convolvulacea subsp. grey-wilsonii	KY070606.1	isolate BOP018004-1	Lobelia aberdarica	NC_035365.1								Lobelia polyphylla	KY354224.1		Craterocapsa insizwae	KC147784.1	U35(J)
Legousia falcata	EU437645.1		Lobelia sonderiana	NC_036079.1											Codonopsis subsimplex	KP318238.1	US3124878	Jasione montana	EU713247.1	F.I.Sales & C.Hedge 9898 (EGHB)				Campanula pallida var. tibetica	JX914701.1	isolate CAM159				Codonopsis convolvulacea subsp. vinciflora	KY070720.1	isolate BOP018040	Lobelia acrochila	NC_035366.1								Lobelia puberula	MF770611.1		Craterocapsa montana	KC147790.1	U1 (J)
Legousia hybrida	EU437660.1		Lobelia spicata	NC_036080.1											Codonopsis tangshen	FJ980314.1	PS0580MT01	Legenere limosa	MF963451.1	isolate CBP035				Campanula pamphylica	JX914869.1	isolate CAM349				Codonopsis convolvulacea var. efilamentosa	KC282766.1		Lobelia anceps	NC_033366.1								Lobelia rhynchopetalum	NC_035384.1		Craterocapsa tarsodes	KC147794.1	U8 (J)
Legousia pentagonia	EU437595.1		Lobelia stricklandiae	NC_033374.1											Codonopsis thalictrifolia	KY071086.1	isolate BOP018048	Legenere valdiviana	NC_035364.1					Campanula pamphylica subsp. afyonica	JX914870.1	isolate CAM350				Codonopsis cordifolioidea	KF366802.1	21121	Lobelia bambuseti	MF061181.1								Lobelia ritabeaniana	NC_035385.1		Cuttsia viburnea	GQ984071.1
Legousia speculum-veneris	EU437593.1		Lobelia stuhlmannii	NC_035389.1											Codonopsis tsinlingensis	KF366897.1	1646248	Legousia falcata	EU713311.1	Cosner 143 (OS)				Campanula pangea	JX914937.1	isolate CAM418				Codonopsis deltoidea	KF366804.1	H12083	Lobelia baumannii	MF770633.1								Lobelia sancta	NC_035386.1		Cyananthus cordifolius	KC880720.1	Nie 1019 (KUN)
Leptocodon gracilis	EU437617.1		Lobelia telekii	NC_035390.1											Codonopsis tubulosa	KP318239.1	US3042833	Legousia hybrida	MK925641.1	NMW7292				Campanula papillosa	JX915104.1	isolate CAM673				Codonopsis farreri	KT970166.1		Lobelia bequaertii	MF061182.1								Lobelia seguinii	KT710175.1	LY Chen & SY Zhao S315 (M)	Cyananthus dolichosceles	KC880722.1	SunH SC11103 (KUN)
Leptocodon hirsutus	KC282719.1		Lobelia thapsoidea	NC_035391.1											Codonopsis ussuriensis	KY369038.1	H.J.Kim8728	Legousia pentagonia	EU713260.1	Cellinese 1013 (YU)				Campanula paradoxa	JX915030.1	isolate CAM560				Codonopsis foetens	KC282767.1		Lobelia boninensis	DQ285118.1								Lobelia sessilifolia	NC_035388.1		Cyananthus flavus subsp. flavus	KC880724.1	SunH SC11072 (KUN)
Lithotoma petraea	NC_033365.1		Lobelia thermalis	NC_036081.1											Codonopsis vinciflora	KC435425.1	H11013	Legousia speculum-veneris	EU713258.1	Eddie 95034 (EGHB)				Campanula parryi	JX915022.1	isolate CAM551				Codonopsis nervosa	JN851173.1		Lobelia burttii subsp. burttii	MF061183.1								Lobelia siphilitica var. siphilitica	KY354225.1		Cyananthus flavus subsp. montanus	KC880725.1	SunH SC0024 (KUN)
Lobelia aberdarica	NC_035365.1		Lobelia thuliniana	NC_033375.1											Codonopsis viridiflora	KP318230.1	HUH359218	Leptocodon gracilis	JN851170.1					Campanula patula	JX914974.1	isolate CAM498				Codonopsis foetens subsp. nervosa	KF366817.1	H11042	Lobelia burttii subsp. meruensis	MF061184.1								Lobelia sonderiana	NC_036079.1		Cyananthus formosus	KC880726.1	SunH YN11217 (KUN)
Lobelia acrochila	NC_035366.1		Lobelia udzungwensis	NC_035392.1											Codonopsis viridis	KC282670.1		Leptocodon hirsutus	KC282758.1					Campanula patula subsp. costae	JX914821.1	isolate CAM296				Codonopsis forrestii	KC282768.1		Lobelia burttii subsp. telmaticola	MF061185.1								Lobelia spicata	NC_036080.1		Cyananthus hookeri	KC880727.1	ZhouZ 006 (KUN)
Lobelia anceps	NC_033366.1		Lobelia urens	NC_035393.1											Colensoa physaloides	AY568735.1		Lithotoma petraea	NC_033365.1					Campanula patula subsp. epigaea	JX914973.1	isolate CAM497				Codonopsis gongshanica	KM675830.1	BOP018421©	Lobelia cardinalis	DQ285129.1								Lobelia stricklandiae	NC_033374.1		Cyananthus incanus subsp. incanus	KC880728.1	Nie 858 (KUN)
Lobelia angulata	AJ235524.1		Lobelia villosa	DQ285293.1											Corokia cotoneaster	EU886831.1	CHR 505464	Lobelia aberdarica	NC_035365.1					Campanula pelviformis	JX914785.1	isolate CAM256				Codonopsis henryi	KT970167.1		Lobelia chinensis	HQ704582.1	Yoo63251							Lobelia stuhlmannii	NC_035389.1		Cyananthus inflatus	KC880731.1	ZhouZ 001 (KUN)
Lobelia arnhemiaca	EF694737.1	Albrecht 9704	Lobelia vivaldii	DQ285284.1											Craterocapsa alfredica	JX536223.1	isolate HB7227	Lobelia acrochila	NC_035366.1					Campanula pendula	JX915044.1	isolate CAM575				Codonopsis inflata	KC282791.1		Lobelia columnaris	DQ285119.1								Lobelia telekii	KT710165.1	LY Chen S109 (M)	Cyananthus lichiangensis	KC880732.1	SunH SC11104 (KUN)
Lobelia bambuseti	MF061181.1		Lobelia wollastonii	NC_035394.1											Craterocapsa congesta	JX536230.1	isolate U4	Lobelia anceps	NC_033366.1					Campanula peregrina	JX915125.1	isolate 25T				Codonopsis javanica	KT970161.1		Lobelia davidii	NC_035372.1								Lobelia thapsoidea	NC_035391.1		Cyananthus lobatus	KT970308.1
Lobelia baumannii	MF770633.1		Lobelia yuccoides	NC_035395.1											Craterocapsa insizwae	JX536222.1	isolate U11	Lobelia bambuseti	MF061181.1					Campanula perpusilla	JX915064.1	isolate CAM595				Codonopsis javanica subsp. japonica	KC282761.1		Lobelia deckenii subsp. deckenii	MF061190.1								Lobelia thermalis	NC_036081.1		Cyananthus longiflorus	KC880734.1	SunH 07ZX 2357 (KUN)
Lobelia bequaertii	MF061182.1		Monopsis alba	NC_036082.1											Craterocapsa montana	JX536225.1	isolate U1	Lobelia baumannii	MF770633.1					Campanula persicifolia	FN397027.1	isolate CAM006				Codonopsis kawakamii	EU713360.1		Lobelia deckenii subsp. incipiens	MF061191.1								Lobelia thuliniana	NC_033375.1		Cyananthus macrocalyx	KC880735.1	SunH SC11162 (KUN)
Lobelia boninensis	KY354217.1		Monopsis debilis var. debilis	MF770616.1											Craterocapsa tarsodes	JX536231.1	isolate U7	Lobelia bequaertii	MF061182.1					Campanula persicifolia subsp. sessiliflora	JX914786.1	isolate CAM257				Codonopsis lanceolata	KC146524.1	Yoo62006	Lobelia doniana	NC_035373.1								Lobelia udzungwensis	NC_035392.1		Cyananthus microphyllus	KC880736.1	Nie 968 (KUN)
Lobelia bridgesii	EF174607.1	Lammers & Baeza 6470	Monopsis flava	MF770617.1											Cuttsia viburnea	DQ499092.1		Lobelia boninensis	KY354217.1					Campanula peshmenii	JX914871.1	isolate CAM351				Codonopsis limprichtii	KY070702.1	isolate BOP018032	Lobelia erinus	NC_036098.1								Lobelia urens	NC_035393.1		Cyananthus pedunculatus	KC880737.1	Nie 950 (KUN)
Lobelia burttii subsp. burttii	MF061183.1		Monopsis stellarioides subsp. schimperiana	MF770618.1											Cyananthus cordifolius	KC880740.1	Nie 1019 (KUN)	Lobelia burttii subsp. burttii	MF061183.1					Campanula petraea	JX915207.1	isolate NC3335				Codonopsis meleagris	KF366816.1	869-397	Lobelia excelsa	DQ285120.1								Lobelia wollastonii	NC_035394.1		Cyananthus sericeus	KC880738.1	Nie 822 (KUN)
Lobelia burttii subsp. meruensis	MF061184.1		Musschia aurea	KY091324.1	AZB:MF-MDPD-001										Cyananthus delavayi	KC282671.1		Lobelia burttii subsp. meruensis	MF061184.1					Campanula petrophila	FN397029.1	isolate CAM050				Codonopsis micrantha	KC282795.1		Lobelia galpinii	NC_036071.1								Lobelia yuccoides	NC_035395.1		Cyanea acuminata	DQ285144.1
Lobelia burttii subsp. telmaticola	MF061185.1		Musschia isambertoi	KY091330.1	AZB:MI-DEDG-001										Cyananthus dolichosceles	JF976181.1	SunH-SC11198	Lobelia burttii subsp. telmaticola	MF061185.1					Campanula phrygia	JX914698.1	isolate CAM156				Codonopsis minima	NC_036311.1		Lobelia gibberoa	DQ285121.1								Michauxia campanuloides	LT706600.1	isolate CAM118	Cyanea angustifolia	DQ356173.1
Lobelia cardinalis	EU437598.1		Musschia wollastonii	KY091329.1	AZB:MW-MDET-021										Cyananthus fasciculatus	KC880748.1	ZhouZ 004 (KUN)	Lobelia cardinalis	NC_036097.1					Campanula phyctidocalyx	JX915066.1	isolate CAM597				Codonopsis ovata	L18797.1		Lobelia gloria-montis	DQ285109.1								Monopsis alba	NC_036082.1		Cyanea coriacea	DQ285145.1
Lobelia carens	EF999978.1	Allan Herbarium (CHR) 591832	Palmerella debilis subsp. serrata	MF061222.1											Cyananthus flavus subsp. flavus	KC880749.1	SunH SC11072 (KUN)	Lobelia chinensis	NC_035370.1					Campanula pinatzii	KC792321.1	Raus 9666				Codonopsis parviflora	KY070725.1	isolate PT-0368	Lobelia gregoriana subsp. elgonensis	MF061194.1								Monopsis debilis var. debilis	MF770616.1		Cyanea fissa	KY354213.1
Lobelia chinensis	NC_035370.1		Pankycodon purpureus	KP318308.1	US2582204										Cyananthus flavus subsp. montanus	KC880750.1	SunH SC0024 (KUN)	Lobelia clavata	KT710171.1	ZH Luo et al. JD131 (KUN)				Campanula pinnatifida	JX914874.1	isolate CAM354				Codonopsis pilosula	KC282772.1		Lobelia gregoriana subsp. gregoriana	MF061195.1								Monopsis flava	MF770617.1		Cyanea floribunda	DQ285173.1
Lobelia columnaris	MF061188.1	isolate Pz3103	Peracarpa carnosa var. circaeoides	HQ704461.1	Yoo75152										Cyananthus formosus	KC880751.1	SunH 07ZX 2374 (KUN)	Lobelia columnaris	MF061188.1	isolate Pz3103				Campanula piperi	JX915139.1	isolate HAB07				Codonopsis pilosula subsp. handeliana	KF366808.1	H10017	Lobelia gregoriana subsp. sattimae	KY354218.1								Monopsis stellarioides subsp. schimperiana	MF770618.1		Cyanea hirtella	DQ285175.1
Lobelia davidii	NC_035372.1		Petkovia orphanidea	EF213544.1	Franzen et al. 18623										Cyananthus hookeri	JF976187.1	SunH-07ZX-2271	Lobelia coronopifolia	KP110097.1					Campanula podocarpa	JX915107.1	isolate CAM676				Codonopsis pilosula subsp. tangshen	JN851174.1		Lobelia hartlaubii	NC_036072.1								Musschia aurea	LT706598.1	isolate CAM112	Cyanea koolauensis	DQ356193.1
Lobelia deckenii subsp. deckenii	MF061190.1		Platycodon grandiflorum	HQ704477.1	Yoo75370										Cyananthus incanus	JF976190.1	NieZL-913	Lobelia davidii	NC_035372.1					Campanula polyclada	KJ910766.1	Rechinger 36562				Codonopsis rotundifolia	KF366818.1	3797	Lobelia holstii	NC_036073.1								Nesocodon mauritianus	LT706566.1	isolate CAM024	Cyanea kuhihewa	DQ285177.1
Lobelia deckenii subsp. incipiens	MF061191.1		Platycodon grandiflorus f. albiflorus	HQ704463.1	Yoo75345										Cyananthus incanus subsp. incanus	KC880766.1	Nie 913 (KUN)	Lobelia deckenii subsp. deckenii	MF061190.1					Campanula pontica	JX914876.1	isolate CAM356				Codonopsis sp.	MF786517.1	US:3540423	Lobelia hypoleuca	DQ285110.1								Palmerella debilis subsp. serrata	MF061222.1		Cyanea leptostegia	DQ285172.1
Lobelia doniana	NC_035373.1		Porterella carnosula	KY354228.1											Cyananthus incanus subsp. petiolatus	KC880770.1	SunH SC11215 (KUN)	Lobelia deckenii subsp. incipiens	MF061191.1					Campanula portenschlagiana	FN397030.1	isolate CAM109				Codonopsis subglobosa	KC282775.1		Lobelia jasionoides	NC_033369.1								Petromarula pinnata	LT706768.1	isolate CAM027	Cyanea pilosa subsp. longipedunculata	DQ285174.1
Lobelia erinus	NC_036098.1		Pratia angulata	MF061180.1											Cyananthus inflatus	MH117502.1	YLDP261B	Lobelia doniana	NC_035373.1					Campanula poscharskyana	JX914784.1	isolate CAM254				Codonopsis subscaposa	KC282797.1		Lobelia kauaensis	DQ285111.1								Physoplexis comosa	KC455832.1		Cyclocodon lancifolium	KP761621.1
Lobelia excelsa	EF174605.1	Lammers et al. 6393	Pratia nummularia	MF061203.1											Cyananthus lichiangensis	KC282675.1		Lobelia dortmanna	JN895292.1	isolate NMW511				Campanula prenanthoides	JX914834.1	isolate CAM311				Codonopsis subsimplex	KF366820.1	20915092	Lobelia laxa	NC_036074.1								Phyteuma betonicifolium	KC455784.1	STU:M. Thiv 3831	Cyclocodon lancifolius	KT970311.1
Lobelia fatiscens	EF999980.1	Knox 5035	Pseudocodon graminifolius	KP318320.1	KWNU89895										Cyananthus lobatus	JF976203.1	NieZL-916	Lobelia erectiuscula	KT710172.1	Qingzang group 0305307 (KUN)				Campanula primulifolia	JX914823.1	isolate CAM298				Codonopsis thalictrifolia	KC282776.1		Lobelia laxiflora	NC_033370.1								Phyteuma charmelii	KC455809.1	WU:G.M. Schneeweiss, P. Schoenswetter & A. Tribsch 5581	Cylindrocarpa sewerzowii	MK556599.1	BOP205726
Lobelia fervens subsp. fervens	MF770602.1		Roella decurrens	MK556031.1	BOP162009										Cyananthus longiflorus	KC282677.1		Lobelia erinus	NC_036098.1					Campanula propinqua	JX914877.1	isolate CAM357				Codonopsis tsinlingensis	KF366826.1	1646248	Lobelia linearis	NC_036075.1								Phyteuma confusum	KC455871.1	STU:A. W rz 24.08.19.01	Cyphia angustiloba	MF770621.1
Lobelia fugax	EF999983.1	Allan Herbarium (CHR) 591934	Sclerotheca forsteri	DQ285287.1											Cyananthus macrocalyx	JF976205.1	SunH-YN11237	Lobelia fervens subsp. fervens	MF770602.1					Campanula pseudostenocodon	JX914976.1	isolate CAM503				Codonopsis tubulosa	KT970170.1		Lobelia longisepala	NC_033371.1								Phyteuma cordatum	KC455807.1	WU:G.M. Schneeweiss, P. Schoenswetter & A. Tribsch 6371	Cyphia banksiana	MF770622.1
Lobelia galpinii	NC_036071.1		Sclerotheca jayorum	DQ285273.1											Cyananthus microphyllus	KC880792.1	Nie 968 (KUN)	Lobelia galpinii	NC_036071.1					Campanula psilostachya	JX914878.1	isolate CAM358				Codonopsis ussuriensis	KC146526.1	Yoo56567	Lobelia lukwangulensis	NC_035376.1								Phyteuma gallicum	KC455815.1	M:W. Lippert & D. Podlech 17687	Cyphia belfastica	MF770623.1
Lobelia gibberoa	NC_035374.1		Sclerotheca viridiflora	MF061223.1											Cyananthus pedunculatus	KC880793.1	Nie 950 (KUN)	Lobelia gibberoa	NC_035374.1					Campanula ptarmicifolia	JX914879.1	isolate CAM359				Codonopsis viridiflora	KT970171.1		Lobelia malowensis	NC_036076.1								Phyteuma globulariifolium subsp. globulariifolium	KC455847.1	WU:P. Schoenswetter & A. Tribsch 4883	Cyphia bulbosa	KC013658.1	Cupido s.n., NBG
Lobelia glaberrima	EF694719.1	Gray 2	Siphocampylus krauseanus	NC_035760.1	Smith & Leiva 509										Cyananthus sericeus	KC880794.1	Nie 822 (KUN)	Lobelia glandulosa	MH621554.1	Trotta950456				Campanula pterocaula	JX914783.1	isolate CAM251				Codonopsis viridis	EU713356.1		Lobelia melliana	NC_035377.1								Phyteuma globulariifolium subsp. pedemontanum	KC455849.1	WU:P. Schoenswetter & A. Tribsch 4789	Cyphia bulbosa var. bulbosa	MF770624.1
Lobelia gregoriana subsp. elgonensis	MF061194.1		Solenopsis bivonae	MF061224.1											Cyananthus sherriffii	KC880795.1	Nie 1050 (KUN)	Lobelia gregoriana subsp. elgonensis	MF061194.1					Campanula pubicalyx	JX915109.1	isolate CAM679				Corokia cotoneaster	L11221.2		Lobelia mildbraedii	NC_035378.1								Phyteuma hedraianthifolium	KC455857.1	WU:P. Schoenswetter 4941	Cyphia comptonii	KC013659.1	Manning s.n., NBG
Lobelia gregoriana subsp. gregoriana	MF061195.1		Symphyandra zangezura	EF213545.1	SS-04-12										Cyanea angustifolia	EU219384.1		Lobelia gregoriana subsp. gregoriana	MF061195.1					Campanula pulla	JX914977.1	isolate CAM504				Craterocapsa tarsodes	EU713408.1		Lobelia morogoroensis	NC_033372.1								Phyteuma hemisphaericum	KC455843.1	STU:M. Thiv 3910B	Cyphia crenata	NC_036089.1
Lobelia gregoriana subsp. sattimae	KY354218.1		Theodorovia karakuschensis	MK556041.1	BOP205699										Cyanea asplenifolia	JX500339.1		Lobelia gregoriana subsp. sattimae	KY354218.1					Campanula pulvinaris	JX914881.1	isolate CAM361				C.viburnea	Y08462.1		Lobelia muscoides	NC_035379.1								Phyteuma humile	KC455845.1	WU:G.M. Schneeweiss, P. Schoenswetter & A. Tribsch 6533	Cyphia decora	GQ984060.1
Lobelia hartlaubii	NC_036072.1		Trachelium caeruleum	NC_010442.1											Cyanea hamatiflora	KM382200.1	isolate Y13	Lobelia hartlaubii	NC_036072.1					Campanula punctata	JX915031.1	isolate CAM561				Cyananthus cordifolius	KC880578.1	Nie 1019 (KUN)	Lobelia nicotianifolia	DQ285122.1								Phyteuma michelii	KC455816.1	STU:M. Thiv s.n.	Cyphia dentariifolia	NC_036090.1
Lobelia heterophylla subsp. heterophylla	MF770605.1		Trematolobelia kauaiensis	NC_035398.1											Cyclocodon celebicus	KY071120.1	isolate BOP018137-4	Lobelia heterophylla subsp. heterophylla	MF770605.1					Campanula pyramidalis	JX915192.1	isolate NC3224				Cyananthus delavayi	KC880586.1	SunH 0520 (KUN)	Lobelia niihauensis	DQ285112.1								Phyteuma nigrum	KC455791.1		Cyphia elata var. gerrardii	MF770627.1
Lobelia holstii	NC_036073.1		Trematolobelia macrostachys	DQ285271.1											Cyclocodon lancifolius	KY071113.1	isolate BOP018014-1	Lobelia holstii	NC_036073.1					Campanula quercetorum	JX914882.1	isolate CAM362				Cyananthus dolichosceles	KC880589.1	SunH SC11103 (KUN)	Lobelia organensis	DQ285123.1								Phyteuma orbiculare	KC455783.1	CLA:C. Groza 7474	Cyphia glandulifera	MF770628.1
Lobelia inflata	NC_033368.1		Wahlenbergia lobelioides subsp. lobelioides	KY091337.1	AZB:WL-MDCI-001										Cylindrocarpa sewerzowii	MK652093.1	isolate BOP205726	Lobelia inflata	NC_033368.1					Campanula radchensis	JX915032.1	isolate CAM562				Cyananthus fasciculatus	KC880591.1	ZhouZ 004 (KUN)	Lobelia patula	NC_036077.1								Phyteuma ovatum	KC455797.1	WU:P. Schoenswetter & A. Tribsch 4581	Cyphia phyteuma	MF770629.1
Lobelia ionantha	EF999984.1	Knox 5039	Wahlenbergia marginata	HQ704464.1	Yoo75148										Delissea undulata	KM382206.1	isolate Y18	Lobelia iteophylla	KT710170.1	YL Li YDDXSB098 (KUN)				Campanula raddeana	JX914826.1	isolate CAM301				Cyananthus flavus subsp. flavus	KC880592.1	SunH SC11072 (KUN)	Lobelia petiolata	DQ285124.1								Phyteuma persicifolium	KC455803.1	WU:G.M. Schneeweiss & P. Schoenswetter 6306	Cyphia rupestris	KF028790.1	G3972
Lobelia jasionoides	NC_033369.1		Wimmerella hederacea	NC_033377.1											Downingia bacigalupii	AF176900.1		Lobelia jasionoides	NC_033369.1					Campanula radicosa	JX914696.1	isolate CAM154				Cyananthus flavus subsp. montanus	KC880593.1	SunH SC0024 (KUN)	Lobelia physaloides	MF770620.1								Phyteuma pseudorbiculare	KC455872.1	B:G. Parolly CN 85.61	Cyphia schlechteri	MF770630.1
Lobelia kauaensis	MF061196.1														Downingia bella	AF163398.1	L.M.Schultheis 302-96a (JEPS)	Lobelia kalmii	KX676934.1	HERB0166				Campanula radula	JX914883.1	isolate CAM363				Cyananthus formosus	KC880595.1	SunH YN11217 (KUN)	Lobelia polyphylla	KY354224.1								Phyteuma pyrenaicum	KC455786.1	WU:G.M. Schneeweiss, P. Schoenswetter & A. Tribsch 6444	Cyphia tortilis	MF770631.1
Lobelia laxa	NC_036074.1														Downingia bicornuta var. bicornuta	AF163362.1	L.M.Schultheis 193-95a (JEPS)	Lobelia kauaensis	MF061196.1					Campanula raineri	JX914694.1	isolate CAM153				Cyananthus hookeri	KC880597.1	ZhouZ 005 (KUN)	Lobelia puberula	MF770611.1								Phyteuma scheuchzeri	LT706767.1	isolate CAM055	Cyphia volubilis	KC013660.1	Cupido 249, NBG
Lobelia laxiflora	NC_033370.1														Downingia bicornuta var. picta	AF163356.1	L.M.Schultheis 167-95a (JEPS)	Lobelia laxa	NC_036074.1					Campanula ramosissima	JX914913.1	isolate CAM393				Cyananthus incanus	JF941332.1	NieZL-1045	Lobelia rhynchopetalum	NC_035384.1								Phyteuma scheuchzeri subsp. columnae	KC455859.1	WU:P. Schoenswetter & B. Frajman 11064	Delissea rhytidosperma	DQ285146.1
Lobelia linearis	NC_036075.1														Downingia concolor	AF229130.1		Lobelia laxiflora	NC_033370.1					Campanula rapunculoides	JX915233.1	isolate NC3393				Cyananthus incanus subsp. incanus	KC880609.1	Nie 913 (KUN)	Lobelia ritabeaniana	NC_035385.1								Phyteuma scheuchzeri subsp. scheuchzeri	KC455875.1	STU:M. Thiv 4016C	Delissea subcordata	DQ285147.1
Lobelia linnaeoides	EF694722.1	Garnock-Jones 1													Downingia concolor var. concolor	AF163363.1	L.M.Schultheis 195-95b (JEPS)	Lobelia leschenaultiana	KT710178.1	C Skottsberg sn (GB)				Campanula rapunculus	JX914708.1	isolate CAM166				Cyananthus incanus subsp. petiolatus	KC880613.1	SunH SC11215 (KUN)	Lobelia sancta	NC_035386.1								Phyteuma scorzonerifolium	KC455805.1	WU:C.J. Dixon 11028	Delissea undulata	DQ356188.1
Lobelia longisepala	NC_033371.1														Downingia cuspidata	AF163352.1	L.M.Schultheis 153-95a (JEPS)	Lobelia linearis	NC_036075.1					Campanula reiseri	JX914739.1	isolate CAM200				Cyananthus inflatus	KC880619.1	Nie 817 (KUN)	Lobelia seguinii	NC_035387.1								Phyteuma serratum	KC455853.1	WU:C. Dobes 4475	Dialypetalum floribundum	MF061169.1
Lobelia lukwangulensis	NC_035376.1														Downingia elegans	AF163401.1	L.M.Schultheis 320-96 (JEPS)	Lobelia longisepala	NC_033371.1					Campanula reverchonii	JX915129.1	isolate 29T				Cyananthus lichiangensis	KC880625.1	SunH SC11193 (KUN)	Lobelia sessilifolia	HQ704583.1	Yoo75343							Phyteuma sieberi	KC455869.1	WU:L. Schratt-Ehrendorfer 7032	Dialypetalum sp.	GQ984048.1	Koopman et al. s.n.
Lobelia macrodon	EF694731.1	Knox 5025B													Downingia laeta	AF163399.1	L.M.Schultheis 314-95a (JEPS)	Lobelia lukwangulensis	NC_035376.1					Campanula rhodensis	JX914781.1	isolate CAM249				Cyananthus lobatus	EU713359.1		Lobelia sonderiana	NC_036079.1								Phyteuma spicatum	KC455792.1	WU:G.M. Schneeweiss & P. Schoenswetter 8815	Diastatea micrantha	DQ356203.1
Lobelia malowensis	NC_036076.1														Downingia montana	AF163391.1		Lobelia malowensis	NC_036076.1					Campanula rhomboidalis	FN397033.1	isolate CAM072				Cyananthus longiflorus	KC880629.1	SunH 07ZX 2357 (KUN)	Lobelia stricklandiae	NC_033374.1								Phyteuma tetramerum	KC455798.1	CLA:C. Groza 7475	Diosphaera rumeliana	EF088778.1	isolate CR86
Lobelia melliana	NC_035377.1														Downingia ornatissima	AF163411.1	L.M.Schultheis 80-95 (JEPS)	Lobelia melliana	NC_035377.1					Campanula robinsiae	JX915140.1	isolate HAB08				Cyananthus macrocalyx	KC880632.1	SunH YN11237 (KUN)	Lobelia stuhlmannii	NC_035389.1								Phyteuma vagneri	KC455827.1	B:P. Anastasiu s.n. C	Downingia bacigalupii	DQ356183.1
Lobelia mildbraedii	NC_035378.1														Downingia pulchella	AF163367.1	L.M.Schultheis 203-95a (JEPS)	Lobelia mildbraedii	NC_035378.1					Campanula romanica	JX914780.1	isolate CAM248				Cyananthus microphyllus	KC880633.1	Nie 968 (KUN)	Lobelia telekii	NC_035390.1								Phyteuma villarsii	KC455811.1	WU:G.M. Schneeweiss & P. Schoenswetter 8911	Downingia insignis	DQ356185.1
Lobelia morogoroensis	NC_033372.1														Downingia pusilla	AF163419.1	Bliss 2269	Lobelia morogoroensis	NC_033372.1					Campanula rotundifolia	JX915164.1	isolate NC3179				Cyananthus pedunculatus	KT970176.1		Lobelia thapsoidea	NC_035391.1								Platycodon grandiflorus	LT706558.1	isolate CAM003	Echinocodon lobophyllus	MH029157.1
Lobelia muscoides	MF061201.1														Downingia yina	AF163423.1	Foster 70-43-15 (DAV)	Lobelia muscoides	NC_035379.1					Campanula rumeliana	FN397035.1	isolate CAM133				Cyananthus sericeus	KC880635.1	Nie 822 (KUN)	Lobelia thermalis	NC_036081.1								Porterella carnosula	KY354228.1		Edraianthus australis	EF213170.1	19966
Lobelia niihauensis	NC_035380.1														Echinocodon lobophyllus	KC282680.1		Lobelia nana	MH037672.1					Campanula rumeliana subsp. chalcidica	JX915177.1	isolate NC3202				Cyananthus sherriffii	KC880636.1	Nie 1050 (KUN)	Lobelia thuliniana	NC_033375.1								Pratia angulata	MF061180.1		Edraianthus dalmaticus	EF213187.1	isolate 1456 Hilda Ritter s.n.
Lobelia organensis	NC_035382.1														Edraianthus tenuifolius	DQ304576.1		Lobelia neglecta	KP110098.1					Campanula rupestris	JX915193.1	isolate NC3226				Cyanea angustifolia	DQ356119.1		Lobelia udzungwensis	NC_035392.1								Pratia nummularia	MF061203.1		Edraianthus dinaricus	EF213189.1	E. Janchen 3083
Lobelia patula	NC_036077.1														Gadellia lactiflora	EU177776.1	Latta 15 €	Lobelia nicotianifolia	KT710166.1	M Strong Clemens 917 (GH)				Campanula rupicola	JX914921.1	isolate CAM401				Cyanea asplenifolia	JX500351.1		Lobelia urens	NC_035393.1								Scaevola taccada	NC_040933.1	14CS8229 (KUN)	Edraianthus glisicii	EF213193.1	K24257
Lobelia petiolata	NC_035383.1														Githopsis pulchella	MK652053.1	isolate BOP104846	Lobelia niihauensis	NC_035380.1					Campanula sabatia	JX914978.1	isolate CAM505				Cyanea coriacea	AF042662.1		Lobelia villosa	DQ285137.1								Sclerotheca viridiflora	MF061223.1		Edraianthus graminifolius	EF213267.1	Bucalovic 20012
Lobelia physaloides	MF770620.1														Githopsis specularioides	MG218925.1	CCDB-23367-B06	Lobelia organensis	NC_035382.1					Campanula samothracica	JX914684.1	isolate CAM142				Cyanea fissa	KY354213.1		Lobelia vivaldii	DQ285128.1								Siphocampylus krauseanus	NC_035760.1	Smith & Leiva 509	Edraianthus horvatii	EF213275.1	Lakusic 2067/91
Lobelia polyphylla	KY354224.1														Hanabusaya asiatica	HQ704540.1	Yoo75337	Lobelia paludosa	MH552070.1	isolate OSBAR 000584				Campanula sarmatica	JX914818.1	isolate CAM293				Cyanea koolauensis	DQ356128.1		Lobelia wollastonii	NC_035394.1								Solenopsis bivonae	MF061224.1		Edraianthus niveus	EF213281.1	isolate 1454 Cedomil Silic s.n.
Lobelia puberula	MF770611.1														Heterocodon rariflorum	MG219595.1	CCDB-22993-H03	Lobelia patula	NC_036077.1					Campanula sarmatica subsp. woronowii	JX915033.1	isolate CAM563				Cyanea leptostegia	MF061168.1		Lobelia yuccoides	DQ285113.1								Trachelium caeruleum	LT706718.1	isolate CAM424	Edraianthus owerinianus	EF213283.1	Radzki s.n.
Lobelia rhynchopetalum	NC_035384.1														Himalacodon dicentrifolius	KP318228.1	G308447	Lobelia petiolata	NC_035383.1					Campanula sartorii	FN397037.1	isolate CAM126				Cyclocodon celebicus	KY070728.1	isolate BOP018137-3	Michauxia campanuloides	LT673942.1	isolate CAM118							Trematolobelia kauaiensis	NC_035398.1		Edraianthus parnassicus	EF213284.1	Horandl et al. 7584
Lobelia ritabeaniana	NC_035385.1														Homocodon brevipes	KC880801.1	ZhouZ 003 (KUN)	Lobelia physaloides	MF770620.1					Campanula sauvagei	KJ910768.1	Montes A9701				Cyclocodon lancifolius	KT970177.1		Monopsis alba	NC_036082.1								Triodanis perfoliata	LT706764.1	isolate CAM891	Edraianthus pumilio	EF213289.1	Solic & Siljak-Yakovlev s.n.
Lobelia roughii	EF694738.1	Knox 5027													Homocodon pedicellatus	KC880800.1	SunH SC11189 (KUN)	Lobelia pleotricha	KT710173.1	T Zhang et al. 10CS2108 (KUN)				Campanula savalanica	JX915068.1	isolate CAM599				Cyphia angustiloba	MF770621.1		Monopsis debilis var. debilis	MF770616.1								Wahlenbergia saxicola	LT706562.1	isolate CAM012	Edraianthus serbicus	EF213294.1	Tomovic 19812.1
Lobelia sancta	NC_035386.1														Howellia aquatilis	AF163433.1		Lobelia polyphylla	KY354224.1					Campanula saxatilis	JX914777.1	isolate CAM244				Cyphia banksiana	MF770622.1		Monopsis flava	MF770617.1								Wimmerella hederacea	NC_033377.1		Edraianthus serbicus subsp. stankovicii	EF213298.1	N.B. 1545/91
Lobelia seguinii	NC_035387.1														Hypsela reniformis	AF054941.1		Lobelia proctorii	KT710177.1	A Argent 8998 (E)				Campanula saxifraga	FN397038.1	isolate CAM093				Cyphia belfastica	MF770623.1		Monopsis stellarioides subsp. schimperiana	MF770618.1											Edraianthus serpyllifolius	HQ679796.1	isolate 1 pop-variant 8
Lobelia sessilifolia	KC146453.1	Yoo75343													Isotoma fluviatilis	AY644648.1		Lobelia puberula	MF770611.1					Campanula saxifragoides	KJ910770.1	JC3059				Cyphia bulbosa specimen	AM234938.1	LHMS 640 (NBG)	Musschia aurea	LT673940.1	isolate CAM112										Edraianthus siculus	EF213317.1	Raimondo et al. (III Iter Mediterraneum 2055)
Lobelia siphilitica var. siphilitica	KY354225.1														Jasione corymbosa	DQ222827.1	isolate SP67	Lobelia rhynchopetalum	NC_035384.1					Campanula saxonorum	JX914885.1	isolate CAM365				Cyphia bulbosa var. bulbosa	MF770624.1		Nesocodon mauritianus	LT673903.1	isolate CAM024										Edraianthus tarae	EF213319.1	Stevanovic 19951
Lobelia sonderiana	NC_036079.1														Jasione crispa	DQ304567.1		Lobelia ritabeaniana	NC_035385.1					Campanula scabrella	JX915224.1	isolate NC3378				Cyphia crenata	NC_036089.1		Pankycodon purpureus	KP318200.1	US2582204										Edraianthus tenuifolius	HQ679645.1	isolate 1 pop-variant 10
Lobelia sp.	MF580393.1	LZ-2017													Jasione crispa subsp. crispa	DQ222832.1	isolate SP1	Lobelia sancta	NC_035386.1					Campanula scheuchzeri	FN397039.1	isolate CAM011				Cyphia dentariifolia	NC_036090.1		Peracarpa carnosa var. circaeoides	HQ704588.1	Yoo75362										Edraianthus wettsteinii	EF213335.1	Medjedovic & Siljak-Yakovlev s.n.
Lobelia spicata	NC_036080.1														Jasione crispa subsp. mariana	DQ222833.1	isolate SP10	Lobelia seguinii	NC_035387.1					Campanula schimaniana	JX915048.1	isolate CAM579				Cyphia elata	L18796.1		Petromarula pinnata	LT673904.1	isolate CAM027										Edraianthus wettsteinii subsp. lovcenicus	EF213337.1	Bulic 20094
Lobelia stricklandiae	NC_033374.1														Jasione crispa subsp. tristis	DQ222831.1	isolate SP12	Lobelia sessilifolia	NC_035388.1					Campanula sciathia	JX915232.1	isolate NC3392				Cyphia elata var. gerrardii	MF770627.1		Physoplexis comosa	LT673893.1	isolate CAM002										Feeria angustifolia	EF088780.1	isolate CR88
Lobelia stuhlmannii	NC_035389.1														Jasione foliosa	DQ222826.1	isolate SP6	Lobelia siphilitica	MG225330.1	JAG 0083				Campanula sclerotricha	JX914886.1	isolate CAM366				Cyphia glandulifera	MF770628.1		Phyteuma scheuchzeri	LT673923.1	isolate CAM055										Gadellia lactiflora	FJ589212.1	MA:Nisa 732
Lobelia telekii	NC_035390.1														Jasione heldreichii	MK652076.1	isolate BOP162097	Lobelia siphilitica var. siphilitica	KY354225.1					Campanula scoparia	JX915110.1	isolate CAM680				Cyphia phyteuma	MF770629.1		Platycodon grandiflorum	HQ704579.1	Yoo75331										Grammatotheca bergiana	DQ356168.1
Lobelia thapsoidea	NC_035391.1														Jasione laevis	DQ222845.1	isolate 18R	Lobelia sonderiana	NC_036079.1					Campanula scopelia	JX914683.1	isolate CAM141				Cyphia rogersii	AJ419698.1		Platycodon grandiflorus	LT673895.1	isolate CAM003										Hanabusaya asiatica	HQ704657.1	Yoo75337
Lobelia thermalis	NC_036081.1														Jasione maritima var. maritima	DQ222842.1	isolate DNA49	Lobelia sp.	KP402310.1	SERC-1076419265				Campanula scouleri	JX914831.1	isolate CAM307				Cyphia schlechteri	MF770630.1		Platycodon grandiflorus f. albiflorus	HQ704580.1	Yoo75345										Heterochaenia borbonica	JF747579.1
Lobelia thuliniana	NC_033375.1														Jasione maritima var. sabularia	DQ222843.1	isolate DNA79	Lobelia spicata	NC_036080.1					Campanula scutellata	JX914682.1	isolate CAM140				Cyphia tortilis	MF770631.1		Pratia angulata	MF061180.1											Heterochaenia ensifolia	JF747581.1
Lobelia tupa	EF174606.1	Royal Botanic Gardens, Kew (RBG) 1985-8148													Jasione montana	DQ304566.1		Lobelia stricklandiae	NC_033374.1					Campanula seraglio	JX914948.1	isolate CAM457				Cyphocarpus rigescens	L18792.1		Pratia nummularia	MF061203.1											Heterochaenia rivalsii	JF747580.1
Lobelia udzungwensis	NC_035392.1														Jasione montana var. bracteosa	DQ222828.1	isolate SP70	Lobelia stuhlmannii	NC_035389.1					Campanula serhouchenensis	KJ910772.1	A9530_JC3092				Delissea rhytidosperma	KY354214.1		Pseudocodon graminifolius	KP318212.1	KWNU89895										Heterocodon rariflorum	JN851182.1
Lobelia urens	NC_035393.1														Jasione montana var. gracilis	DQ222841.1	isolate DNA38	Lobelia telekii	NC_035390.1					Campanula serrata	JX914923.1	isolate CAM403				Dialypetalum floribundum	MF061169.1		Sclerotheca forsteri	DQ285131.1											Hippobroma longiflora	DQ356206.1
Lobelia wollastonii	NC_035394.1														Jasione montana var. latifolia	DQ222839.1	isolate DNA98	Lobelia thapsoidea	NC_035391.1					Campanula serrata subsp. recta	JX914782.1	isolate CAM250				Dialypetalum sp.	AJ318991.1	Gustafsson 244	Sclerotheca jayorum	DQ285117.1											Homocodon brevipes	JN851183.1
Lobelia yuccoides	MF061221.1														Jasione montana var. montana	DQ222836.1	isolate DNA25	Lobelia thermalis	NC_036081.1					Campanula shetleri	JX914837.1	isolate CAM314				Diastatea micrantha	MF061170.1		Apetahia longistigmata	DQ285116.1											Homocodon pedicellatus	JN851184.1
Lysipomia pumila	EF174608.1	Ayers 1184													Jasione perennis	DQ304568.1		Lobelia thuliniana	NC_033375.1					Campanula sibirica	JX914681.1	isolate CAM139				Downingia bacigalupii	EF141031.1		Apetahia margaretae	DQ285130.1											Hypsela tridens	MF061174.1
Lysipomia sphagnophila	EF174609.1	Sanchez-Vega 8799													Jasione sessiliflora	DQ222830.1	isolate 13R	Lobelia udzungwensis	NC_035392.1					Campanula sibirica subsp. brassicifolia	JX915034.1	isolate CAM564				Downingia cuspidata	MF061171.1		Sclerotheca viridiflora	MF061223.1											Isotoma axillaris	DQ285166.1
Merciera tenuifolia	EU437630.1														Jasione supina	DQ222829.1	isolate SP8	Lobelia urens	NC_035393.1					Campanula sibirica subsp. charadzae	JX915035.1	isolate CAM565				Downingia elegans	MF061172.1		Siphocampylus krauseanus	NC_035760.1	Smith & Leiva 509										Isotoma fluviatilis subsp. fluviatilis	DQ356230.1
Michauxia tchihatchewii	EU437574.1														Legenere limosa	MF963814.1	isolate CBP035	Lobelia wollastonii	NC_035394.1					Campanula sibirica subsp. ciscaucasica	JX915036.1	isolate CAM566				Downingia insignis	EF141030.1	Tiehm 12143(S)	Solenopsis bivonae	MF061224.1											Isotoma hypocrateriformis	MF061176.1	isolate K5274
Microcodon glomeratum	EU437627.1														Legousia falcata	DQ304589.1		Lobelia yuccoides	MF061221.1					Campanula sibirica subsp. divergens	JX914810.1	isolate CAM284				Downingia laeta	MG221484.1	CCDB-24795-A10	Trachelium caeruleum	LT674066.1	isolate CAM424										Isotoma tridens	NC_035362.1
Monopsis alba	NC_036082.1														Legousia hybrida	KX165720.1	NMW7293	Merciera azurea	KP110103.1					Campanula simulans	JX914680.1	isolate CAM138				Echinocodon lobophyllus	MH029157.1		Trematolobelia kauaiensis	DQ285114.1											Jasione heldreichii	EF088781.1	isolate CR89
Monopsis debilis var. debilis	MF770616.1														Leptocodon gracilis	KC880802.1	Nie 798 (KUN)	Merciera tenuifolia	EU713295.1	K.Steiner 2445 (OS)				Campanula sp.	FN397041.1	CAM076 isolate CAM076				Edraianthus graminifolius	EU643705.1		Trematolobelia macrostachys	DQ285115.1											Jasione montana	EF088782.1	isolate CR90
Monopsis flava	MF770617.1														Leptocodon hirsutus	KY071070.1	isolate BOP018007-1	Michauxia tchihatchewii	EU713239.1	Eddie 2449 (EGHB)				Campanula sparsa	JX914679.1	isolate CAM137				Feeria angustifolia	EU713394.1		Triodanis sp.	LT674108.1	CAM891 isolate CAM891										Legenere valdiviana	NC_035364.1
Monopsis stellarioides subsp. schimperiana	MF770618.1														Lobelia aberdarica	AF163435.1		Microcodon glomeratum	EU713292.1	Cupido & Eddie 1007 (TEX)				Campanula spatulata	FN397040.1	isolate CAM132				Githopsis diffusa	EU713417.1		Wahlenbergia marginata	HQ704581.1	Yoo75148										Legousia hybrida	EF088783.1	isolate CR91
Musschia aurea	EU437638.1														Lobelia alsinoides	KT957608.1	T.S. Yi,et al. MJ-796 (KUN)	Monopsis alba	NC_036082.1					Campanula spatulata subsp. filicaulis	JX914676.1	isolate CAM134				Githopsis pulchella	EU713420.1		Wahlenbergia saxicola	LT673899.1	isolate CAM012										Lithotoma petraea	NC_033365.1
Nesocodon mauritianus	EU437648.1														Lobelia anatina	AY350628.1		Monopsis debilis var. debilis	MF770616.1					Campanula spatulata subsp. spruneriana	JX915172.1	isolate NC3193				Githopsis specularioides	MG223516.1	CCDB-23367-A06	Wimmerella hederacea	NC_033377.1											Lobelia aberdarica	KT957581.1	L.Y. Chen S140 (M)
Ostrowskia magnifica	KF366757.1	Kamelin													Lobelia bambuseti	KT957602.1	Sino-African research group SAJIT-002087 (HIB, M)	Monopsis flava	MF770617.1					Campanula speciosa	JX914813.1	isolate CAM288				Grammatotheca bergiana	MF770632.1														Lobelia acrochila	NC_035366.1
Palmerella debilis subsp. serrata	MF061222.1														Lobelia boninensis	KT957589.1	H. Kato & A. Ono 10296 (MAK)	Monopsis stellarioides subsp. schimperiana	MF770618.1					Campanula speciosa subsp. affinis	JX914971.1	isolate CAM492				Hanabusaya asiatica	KC146527.1	Yoo75337													Lobelia aguana	DQ356176.1
Pentaphragma ellipticum	AJ318980.1														Lobelia brevifolia	KT957584.1	S.L. Orzell & E.L. Bridges 8519 (M)	Musschia aurea	KY091408.1	AZB:MF-MDCM-003				Campanula spicata	FN397044.1	isolate CAM053				Heterochaenia ensifolia	EU713440.1														Lobelia anceps	DQ356184.1
Peracarpa carnosa	KT970144.1														Lobelia burttii	KT957603.1	Sino-African research group SAJIT-002560 (HIB, M)	Musschia isambertoi	KY091410.1	AZB:MI-DEDG-001				Campanula stellaris	JX914737.1	isolate CAM198				Heterocodon rariflorum	JN851176.1														Lobelia aquatica	DQ356182.1
Peracarpa carnosa var. circaeoides	KC146448.1	Yoo75152													Lobelia calcarata	AY350623.1		Musschia wollastonii	KY091416.1	AZB:MW-MDET-021				Campanula stenosiphon	JX914918.1	isolate CAM398				Codonopsis dicentrifolia	EU713357.1														Lobelia bambuseti	KT957569.1	SAJIT-002087 (HIB, M)
Petromarula pinnata	EU437659.1														Lobelia capillifolia	KT957585.1	J. Lavranos 6194 (M)	Nemacladus glanduliferus	MF963547.1	isolate CBP172				Campanula stevenii	JX915234.1	isolate NC3394				Himalacodon dicentrifolius	KY070675.1	isolate BOP018003-1													Lobelia baumannii	MF770633.1
Physoplexis comosa	EU437590.1														Lobelia cardinalis	AY350630.1		Nesocodon mauritianus	EU713314.1	Eddie 95042 (EGHB)				Campanula stevenii subsp. alberti	JX915037.1	isolate CAM567				Hippobroma longiflora	DQ356140.1														Lobelia bequaertii	MF061182.1
Phyteuma spicatum	EU437589.1														Lobelia chamaedryfolia	KT957586.1	Mathews 7778 (M)	Ostrowskia magnifica	KF366793.1	Kamelin				Campanula stevenii subsp. altaica	JX914735.1	isolate CAM196				Homocodon brevipes	JN851177.1														Lobelia boninensis	DQ285157.1
Platycodon grandiflorus	KY368995.1	H.J.Kim8710													Lobelia chinensis	JF708188.1		Palmerella debilis subsp. serrata	MF061222.1					Campanula stevenii subsp. beauverdiana	JX914891.1	isolate CAM371				Homocodon pedicellatus	KT970178.1														Lobelia burttii	KT957578.1	SAJIT-002560 (HIB, M)
Platycodon grandiflorus f. albiflorus	KC146450.1	Yoo75345													Lobelia clavata	KT957591.1	Z.H. Luo et al. JD131 (KUN)	Pankycodon purpureus	KY070936.1	isolate BOP018002-2				Campanula stevenii subsp. stevenii	JX914687.1	isolate CAM146				Hypsela tridens	MF061174.1														Lobelia burttii subsp. burttii	MF061183.1
Porterella carnosula	KY354228.1														Lobelia comosa	KC013707.1	Cupido s.n., NBG	Pentaphragma ellipticum	AJ429387.1					Campanula stevenii subsp. wolgensis	JX915041.1	isolate CAM571				Isotoma tridens	NC_035362.1														Lobelia burttii subsp. meruensis	MF061184.1
Pratia angulata	MF061180.1														Lobelia cordifolia	AY350624.1		Peracarpa carnosa	KT970217.1					Campanula stricta	JX914692.1	isolate CAM151				Isotoma fluviatilis subsp. australis	KR011115.1														Lobelia burttii subsp. telmaticola	MF061185.1
Pratia nummularia	MF061203.1														Lobelia coronopifolia	KC013709.1	Mannie s.n., NBG	Peracarpa carnosa var. circaeoides	KC146488.1	Yoo75152				Campanula stricta var. alidagensis	JX914893.1	isolate CAM373				Isotoma fluviatilis subsp. borealis	KR011114.1														Lobelia cardinalis	DQ356231.1
Prismatocarpus diffusus	EU437629.1														Lobelia cymbalarioides	KT957587.1	SAJIT 002549 (HIB, M)	Petromarula pinnata	EU713326.1	Cellinese 1008 (YU)				Campanula stricta var. libanotica	JX914688.1	isolate CAM147				Isotoma fluviatilis subsp. fluviatilis	EF999977.1	Jobson 7458													Lobelia chinensis	DQ356228.1
Prismatocarpus fruticosus	EU437634.1														Lobelia davidii	KT957592.1	L.Y. Chen & S.Y. Zhao S314 (M)	Phelline lucida	AJ429388.1					Campanula strigillosa	JX914793.1	isolate CAM264				Isotoma hypocrateriformis	MF061176.1	isolate K5274													Lobelia clavata	KT957567.1	Z.H. Luo et al. JD131 (KUN)
Prismatocarpus schlechteri	EU437632.1														Lobelia deckenii	KT957604.1	Sino-African research group SAJIT-002147 (HIB, M)	Physoplexis comosa	EU713255.1	Eddie 95008 (EGHB)				Campanula strigosa	JX914895.1	isolate CAM375				Jasione crispa	EU713390.1														Lobelia columnaris	DQ285158.1
Prismatocarpus sessilis	EU437631.1														Lobelia divaricata	AY362764.1		Phyteuma orbiculare	MK925800.1	NMW7297				Campanula suanetica	JX915097.1	isolate CAM657				Jasione heldreichii	EU713388.1														Lobelia comosa	KC013661.1	Cupido s.n., NBG
Pseudocodon convolvulaceus	KP793413.1	Yu 17456													Lobelia dortmanna	EU219388.1		Phyteuma spicatum	EU713254.1	Eddie 96090 (EGHB)				Campanula takesimana	JX914816.1	isolate CAM291				Jasione laevis	EU713387.1														Lobelia cordifolia	DQ356204.1
Pseudocodon convolvulaceus subsp. forrestii	KP793414.1	Chiou 481A													Lobelia dunnii	AF163408.1	L.M.Schultheis 574-97 (JEPS)	Platycodon grandiflorus	KC282759.1					Campanula takhtadzhianii	JX914825.1	isolate CAM300				Jasione montana	EU713354.1														Lobelia coronopifolia	DQ356181.1
Pseudocodon petiolatus	KP793416.1	isolate barcode 01173946 Q-T Expedition 13331 (PE)													Lobelia erectiuscula	KT957593.1	Qingzang Group 751869 (KUN)	Platycodon grandiflorus f. albiflorus	KC146490.1	Yoo75345				Campanula tanfanii	JX914792.1	isolate CAM263				Legenere limosa	MF963071.1	isolate CBP035													Lobelia davidii	KT957561.1	S.R. Yi 331 (KUN)
Pseudocodon retroserratus	KP793418.1	Hong, Ma & Wang H11038													Lobelia erinus	HQ823435.1		Porterella carnosula	KY354228.1					Campanula telephioides	JX914896.1	isolate CAM376				Legenere valdiviana	NC_035364.1														Lobelia deckenii	KT957580.1	SAJIT-002147 (HIB, M)
Pseudonemacladus oppositifolius	EU437600.1														Lobelia exaltata	EU219383.1		Pratia angulata	MF061180.1					Campanula telmessi	JX915101.1	isolate CAM663				Legousia falcata	EU713418.1														Lobelia deckenii subsp. deckenii	MF061190.1
Rhigiophyllum squarrosum	EU437653.1														Lobelia fenestralis	AY350634.1		Pratia nummularia	MF061203.1					Campanula teucrioides	JX914897.1	isolate CAM377				Legousia hybrida	EU713434.1														Lobelia deckenii subsp. incipiens	MF061191.1
Roella ciliata	EU437633.1														Lobelia fistulosa	EU219387.1		Prismatocarpus brevilobus	KP110125.1					Campanula thessala	JX914689.1	isolate CAM148				Legousia pentagonia	EU713367.1														Lobelia doniana	KT957564.1	Z.L. Nie et al. SunH-07ZX-2345 (KUN)
Roussea simplex	AJ235586.2														Lobelia flexuosa	AY350626.1		Prismatocarpus diffusus	EU713294.1	Eddie 01006 (TEX)				Campanula thyrsoides	FN397046.1	isolate CAM103				Legousia speculum-veneris	EU713365.1														Lobelia dortmanna	DQ356232.1
Sclerotheca viridiflora	MF061223.1														Lobelia gibberoa	EU219380.1		Prismatocarpus fruticosus	EU713299.1	Eddie 01004 (TEX)				Campanula tokurii	JX914898.1	isolate CAM378				Leptocodon gracilis	EU713389.1														Lobelia erectiuscula	KT957570.1	Qingzang Group 751869 (KUN)
Siphocampylus affinis	EF174620.1	Muchhala 113													Lobelia gregoriana	EU219379.1		Prismatocarpus schlechteri	EU713297.1	Eddie 010033 (TEX)				Campanula tomentosa	JX914690.1	isolate CAM149				Leptocodon hirsutus	KT970179.1														Lobelia erinus	DQ356233.1
Siphocampylus ecuadorensis	EF174617.1	Muchhala 175													Lobelia holstii	KT957588.1	L.Y. Chen S097 (M)	Prismatocarpus sessilis	EU713296.1	Eddie 01018 (TEX)				Campanula tommasiniana	JX914691.1	isolate CAM150				Isotoma axillaris	DQ268874.1	EB Knox 2368													Lobelia exaltata	DQ356200.1
Siphocampylus giganteus	EF174621.1	Muchhala 101													Lobelia irasuensis	AY362765.1		Pseudocodon convolvulaceus subsp. forrestii	KP793427.1	Cheng 92396				Campanula topaliana	JX914908.1	isolate CAM388				Lithotoma petraea	NC_033365.1														Lobelia excelsa	DQ285159.1
Siphocampylus krauseanus	NC_035760.1	Smith & Leiva 509													Lobelia iteophylla	KT957594.1	Y.L. Li et al. YDDXSB098 (KUN)	Pseudocodon graminifolius	KY070958.1	isolate BOP018022-2				Campanula topaliana subsp. cordifolia	JX915071.1	isolate CAM602				Lobelia aberdarica	KT710181.1	LY Chen S140 (M)													Lobelia fervens subsp. fervens	MF770602.1
Siphocampylus tupaeformis	EF174615.1	Royal Botanic Gardens, Kew (RBG) 1986-6038													Lobelia jasionoides	KC013708.1	Cupido 120, NBG	Pseudocodon hirsutus	KY070950.1	isolate BOP018041-3				Campanula topaliana subsp. delphica	JX914920.1	isolate CAM400				Lobelia acrochila	NC_035366.1														Lobelia fistulosa	DQ356201.1
Siphocodon debilis	EU437649.1														Lobelia laxiflora	AY350631.1		Pseudocodon retroserratus	KP793428.1	Hong, Ma & Wang H11038				Campanula trachelium	FN397049.1	isolate CAM007				Lobelia aguana	DQ356122.1														Lobelia galpinii	NC_036071.1
Siphocodon spartioides	EU437640.1														Lobelia leschenaultiana	KT957595.1	C. Skottsberg s.n. (GB)	Pseudocodon rosulatus	KY070984.1	isolate BOP018193				Campanula trachelium subsp. athoa	JX914678.1	isolate CAM136				Lobelia anceps	NC_033366.1														Lobelia gibberoa	DQ285160.1
Solenopsis bivonae	MF061224.1														Lobelia mcvaughii	AY350627.1		Pseudonemacladus oppositifolius	GQ983646.1					Campanula trachyphylla	JX914677.1	isolate CAM135				Lobelia aquatica	EF141029.1	Jacobs et al. 4080(GB)													Lobelia gloria-montis	DQ285148.1
Solenopsis minuta	EU437597.1														Lobelia melliana	KT957596.1	Z.Y. Wu et al. s.n. (KUN)	Rhigiophyllum squarrosum	EU713319.1	Eddie 01015 (TEX)				Campanula trichocalycina	FN397051.1	isolate CAM130				Lobelia arnhemiaca	EF694737.1	Albrecht 9704													Lobelia graniticola	DQ356194.1
Symphyandra armena	EU437611.1														Lobelia nana	AY350629.1		Roella ciliata	EU713298.1	Ayers s.n. (B.H.)				Campanula tridentata	FN397052.1	isolate CAM104				Lobelia assurgens	KF724237.1	Atha 772 (NY)													Lobelia gregoriana subsp. elgonensis	MF061194.1
Symphyandra hofmannii	EU437605.1														Lobelia nicotianifolia	KT957597.1	M. Strong Clemens 917 (GH)	Roussea simplex	AJ429389.1					Campanula tridentata subsp. biebersteiniana	JX914998.1	isolate CAM526				Lobelia bambuseti	MF061181.1														Lobelia gregoriana subsp. gregoriana	MF061195.1
Symphyandra pendula	EU437613.1														Lobelia nubigena	KT957598.1	L.Y. Chen & G.W. Hu 034 (HIB, M)	Scaevola sp.	AJ429385.1	Lundberg 55				Campanula tristis	JX914979.1	isolate CAM506				Lobelia baumannii	MF770633.1														Lobelia gregoriana subsp. sattimae	DQ356187.1
Theilera guthriei	EU437637.1														Lobelia pleotricha	KT957599.1	T. Zhang et al. 10CS2108 (KUN)	Sclerotheca viridiflora	MF061223.1					Campanula troegerae	JX914945.1	isolate CAM444				Lobelia bequaertii	MF061182.1														Lobelia heterophylla subsp. heterophylla	MF770605.1
Trachelium caeruleum	EU437661.1														Lobelia polyphylla	AY350633.1		Siphocampylus krauseanus	NC_035760.1	Smith & Leiva 509				Campanula tubulosa	JX914949.1	isolate CAM461				Lobelia boninensis	KT710200.1	H Kato & A Ono 10296 (MAK)													Lobelia holstii	NC_036073.1
Trematolobelia kauaiensis	NC_035398.1														Lobelia rhynchopetalum	FJ664109.1	ecotype Debark	Siphocodon debilis	EU713315.1	Eddie 01016 (TEX)				Campanula turczaninovii	FN397053.1	isolate CAM074				Lobelia bridgesii	EF174607.1	Lammers & Baeza 6470													Lobelia hypoleuca	DQ356191.1
Triodanis coloradoensis	EU437592.1														Lobelia seguinii	KT957600.1	L.Y. Chen & S.Y. Zhao S315 (M)	Siphocodon spartioides	EU713306.1	Eddie 01017 (TEX)				Campanula tymphaea	JX914950.1	isolate CAM462				Lobelia burttii subsp. burttii	MF061183.1														Lobelia inflata	NC_033368.1
Triodanis perfoliata	EU437591.1														Lobelia sessilifolia	HQ704544.1	Yoo75343	Solenopsis bivonae	MF061224.1					Campanula uniflora	JX914833.1	isolate CAM309				Lobelia burttii subsp. meruensis	MF061184.1														Lobelia irasuensis	DQ356175.1
Wahlenbergia angustifolia	EU437639.1														Lobelia siphilitica	DQ006015.1	Beyersdorfer 185 US	Solenopsis minuta	EU713262.1	Cellinese 1011 (YU)				Campanula uyemurae	JX915040.1	isolate CAM570				Lobelia burttii subsp. telmaticola	MF061185.1														Lobelia iteophylla	KT957562.1	Y.L. Li et al. YDDXSB098 (KUN)
Wahlenbergia berteroi	EU437650.1														Lobelia sp.	MF580389.1	LZ-2017	Symphyandra armena	EU713276.1	Eddie 760258 (EGHB)				Campanula vaillantii	KJ910774.1	A9579				Lobelia capillifolia	KP110358.1														Lobelia jasionoides	KC013662.1	Cupido 120, NBG
Wahlenbergia gloriosa	EU437635.1														Lobelia stricklandiae	EU219381.1		Symphyandra hofmannii	EU713270.1	Eddie 750893A (EGHB)				Campanula velata	KJ910775.1	Molero s.n.				Lobelia cardinalis	NC_036097.1														Lobelia kalmii	EF126736.1	Boufford 7292 (GB)
Wahlenbergia hederacea	EU437628.1														Lobelia telekii	KT957606.1	L.Y. Chen et al. S109 (M)	Symphyandra pendula	EU713278.1	Gaskin 255 (MO)				Campanula velebitica	JX914955.1	isolate CAM469				Lobelia carens	EF999979.1	Allan Herbarium (CHR) 591831													Lobelia kauaensis	DQ285150.1
Wahlenbergia linifolia	EU437651.1														Lobelia tenera	AF054938.1		Theilera guthriei	EU713302.1	Eddie 01019 (TEX)				Campanula veneris	JX914765.1	isolate CAM230				Lobelia chinensis	AB645974.1	specimen_: TNS:G.Kokubugata11397													Lobelia kraussi	DQ356179.1
Wahlenbergia marginata	KC146451.1	Yoo75148													Lobelia thapsoidea	KT957607.1	M. Aparecida da Silva & D. Alvarenga 4255 (MO)	Trachelium caeruleum	NC_010442.1					Campanula versicolor	JX915228.1	isolate NC3388				Lobelia clavata	KT710186.1	ZH Luo et al JD131 (KUN)													Lobelia laxa	NC_036074.1
Wimmerella hederacea	NC_033377.1														Lobelia tupa	AY350632.1		Trematolobelia kauaiensis	NC_035398.1					Campanula waldsteiniana	JX914790.1	isolate CAM261				Lobelia columnaris	MF061188.1	isolate Pz3103													Lobelia laxiflora	DQ356209.1
Zeugandra iranica	KT970147.1														Lobelia urens	KY091359.1	AZB:LU-MDFA-001	Triodanis coloradoensis	EU713257.1	Haberle 141 (TEX)				Campanula wilkinsiana	JX915222.1	isolate NC3376				Lobelia coronopifolia	EF141025.1	Dahlstrand 1084(GB)													Lobelia leschenaultiana	DQ356196.1
															Lobelia volcanica	AY350625.1		Triodanis perfoliata	EU713256.1	Cosner 178 (OS)				Campanula willkommii	JX914789.1	isolate CAM260				Lobelia davidii	NC_035372.1														Lobelia linearis	NC_036075.1
															Lysipomia aretioides	AF054964.1		Wahlenbergia angustifolia	EU713305.1	Eddie/C.Weeks s.n. (EGHB)				Campanula witasekiana	JX915168.1	isolate NC3186				Lobelia deckenii	KT710197.1	SAJIT 002147 (M)													Lobelia longisepala	NC_033371.1
															Lysipomia bilineata	AF054963.1		Wahlenbergia berteroi	EU713316.1	Anderson s.n. (CONN)				Campanula xylocarpa	JX914759.1	isolate CAM222				Lobelia deckenii subsp. deckenii	MF061190.1														Lobelia lukwangulensis	NC_035376.1
															Lysipomia brachysiphonia	AF054962.1		Wahlenbergia gloriosa	EU713300.1	T.Ayers 88-217 (BH)				Campanula xylopoda	JX915088.1	isolate CAM634				Lobelia deckenii subsp. incipiens	MF061191.1														Lobelia malowensis	NC_036076.1
															Lysipomia caespitosa	AF054961.1		Wahlenbergia hederacea	EU713293.1	Eddie 98004W (EGHB)				Campanula yaltirikii	JX914899.1	isolate CAM379				Lobelia doniana	NC_035373.1														Lobelia martagon	DQ356205.1
															Lysipomia crassomarginata	AF054960.1		Wahlenbergia linifolia	EU713317.1	Eddie/C.Wicks 98005 (EGHB)				Campanula yildirimlii	JX914900.1	isolate CAM380				Lobelia dortmanna	DQ356162.1														Lobelia melliana	KT957563.1	Z.Y. Wu et al. s.n. (KUN)
															Lysipomia cuspidata	AF054959.1		Wahlenbergia lobelioides subsp. lobelioides	KY091436.1	LISC:2906				Campanula zangezura	JX914922.1	isolate CAM402				Lobelia erectiuscula	KT710188.1	Qingzang Group 0305307 (KUN)													Lobelia mildbraedii	NC_035378.1
															Lysipomia cylindrocarpa	AF054958.1		Wahlenbergia macrostachys	KP110170.1					Campanula zoysii	JX914954.1	isolate CAM468				Lobelia erinus	NC_036098.1														Lobelia morogoroensis	NC_033372.1
															Lysipomia delicatula	AF054957.1		Wahlenbergia marginata	KC282732.1					Campanulaceae sp.	FN397065.1	CAM051 isolate CAM051				Lobelia exaltata	DQ356135.1														Lobelia muscoides	NC_035379.1
															Lysipomia glandulifera	AF054956.1		Wahlenbergia sp.	MF786989.1	US:3559084				Canarina abyssinica	KP761461.1	isolate aby05_Bir_bis				Lobelia excelsa	DQ356146.1														Lobelia nana	KP761617.1
															Lysipomia globularis	AF054955.1		Wahlenbergia unidentata	KP110171.1					Canarina canariensis	KP798363.1	isolate c28_7				Lobelia fatiscens	EF999980.1	Knox 5035													Lobelia nicotianifolia	DQ285161.1
															Lysipomia hutchinsonii	AF054954.1		Wimmerella hederacea	NC_033377.1					Canarina eminii	KP761489.1	isolate e02_Dem				Lobelia feayana	KJ773638.1														Lobelia niihauensis	DQ285151.1
															Lysipomia laciniata,	LN828291.1	isolate ED1100	Zeugandra iranica	KT970220.1					Carpodetus serratus	MF770619.1					Lobelia fervens subsp. fervens	MF770602.1														Lobelia nubigena	KT957575.1	L.Y. Chen & G.W. Hu 034 (HIB, M)
															Lysipomia laricina	AF054952.1								Centropogon granulosus	MF061166.1					Lobelia fistulosa	DQ356136.1														Lobelia nummularia	DQ356235.1
															Lysipomia lehmannii	AF054951.1								Centropogon nigricans	KY045478.1	Muchhala 118				Lobelia fugax	EF999983.1	Allan Herbarium (CHR) 591934													Lobelia oligophylla	DQ356227.1
															Lysipomia montioides	AF054950.1								Clermontia fauriei	NC_035355.1					Lobelia galpinii	NC_036071.1														Lobelia organensis	DQ285162.1
															Lysipomia multiflora	AF054949.1								Codonopsis affinis	KT970347.1					Lobelia gibberoa	DQ356127.1														Lobelia patula	NC_036077.1
															Lysipomia muscoides	AF054948.1								Codonopsis alpina	KF366833.1	28529				Lobelia glaberrima	EF694719.1	Gray 2													Lobelia petiolata	DQ285163.1
															Lysipomia ollgaardii	AF054947.1								Codonopsis argentea	KF366834.1	627				Lobelia glandulosa	KJ773639.1														Lobelia physaloides	MF770620.1
															Lysipomia pumila	AF054946.1								Codonopsis benthamii	KP761458.1					Lobelia graniticola	DQ356129.1														Lobelia pleotricha	KT957572.1	T. Zhang et al.10CS2108 (KUN)
															Lysipomia sp.	AF054965.1	nov. 8728							Codonopsis bhutanica	KC282800.1					Lobelia gregoriana subsp. elgonensis	MF061194.1														Lobelia polyphylla	DQ356177.1
															Lysipomia sparrei	AF054945.1								Codonopsis bulleyana	KT970349.1					Lobelia gregoriana subsp. gregoriana	MF061195.1														Lobelia portoricensis	DQ356208.1
															Lysipomia speciosa	AF054944.1								Codonopsis canescens	KC282831.1					Lobelia gregoriana subsp. sattimae	KY354218.1														Lobelia puberula	MF770611.1
															Lysipomia sphagnophila	AF054943.1								Codonopsis cardiophylla	KF366838.1	5640				Lobelia hartlaubii	NC_036072.1														Lobelia purpurascens	DQ356229.1
															Lysipomia subpeltata	AF054942.1								Codonopsis chlorocodon	KF366839.1	H12071				Lobelia heterophylla subsp. heterophylla	MF770605.1														Lobelia rhynchopetalum	NC_035384.1
															Lysipomia vitreola	AF054939.1								Codonopsis clematidea	KT970350.1					Lobelia holstii	NC_036073.1														Lobelia ritabeaniana	NC_035385.1
															Merciera azurea	KC013666.1	Cupido 111, NBG							Codonopsis convolvulacea	KF028807.1	A6822_Zhang				Lobelia hypoleuca	DQ356126.1														Lobelia rotundifolia	DQ356178.1
															Merciera brevifolia	KC013667.1	Cupido 235, NBG							Codonopsis convolvulacea var. efilamentosa	KC282804.1					Lobelia inflata	NC_033368.1														Lobelia roughii	EF126737.1	Skottsberg s.n. (GB 8694)
															Merciera eckloniana	KC013668.1	Cupido 76, NBG							Codonopsis cordifolioidea	KF366841.1	26972				Lobelia ionantha	EF999984.1	Knox 5039													Lobelia sancta	NC_035386.1
															Merciera leptoloba	KC013669.1	Cupido 108, NBG							Codonopsis deltoidea	KF366843.1	H12086				Lobelia irasuensis	KU670750.1	isolate LL23													Lobelia seguinii	KT957571.1	L.Y. Chen & S.Y. Zhao S315 (HIB, M)
															Michauxia laevigata	KC294445.1								Codonopsis dicentrifolia	KC282803.1					Lobelia iteophylla	KT710185.1	YL Li YDDXSB098 (KUN)													Lobelia sessilifolia	HQ704663.1	Yoo75343
															Microcodon glomeratus	KC013670.1	Cupido 105, NBG							Codonopsis farreri	KT970351.1					Lobelia jasionoides	NC_033369.1														Lobelia siphilitica var. siphilitica	KY354225.1
															Microcodon sp.	KC013671.1	2 JMP-2013 Cupido 197, NBG							Codonopsis foetens	KC282805.1					Lobelia kalmii	DQ356166.1														Lobelia sonderiana	DQ356195.1
															Musschia aurea	KY091365.1	AZB:MU-MDGA-007							Codonopsis foetens subsp. nervosa	KF366853.1	H11042				Lobelia kauaensis	MF061196.1														Lobelia spicata	NC_036080.1
															Musschia isambertoi	KY091367.1	AZB:MI-DEDG-001							Codonopsis forrestii	KC282806.1					Lobelia kraussi	EF141024.1	Hill 25677(NY)													Lobelia stricklandiae	DQ356186.1
															Musschia wollastonii	KY091368.1	AZB:MW-MDET-005							Codonopsis gongshanica	KM675831.1	BOP018421(A)				Lobelia laxa	NC_036074.1														Lobelia stricta	DQ356207.1
															Nemacladus glanduliferus	MF963913.1								Codonopsis graminifolia	KC282807.1					Lobelia laxiflora	NC_033370.1														Lobelia stuhlmannii	NC_035389.1
															Ostrowskia magnifica	KP761423.1								Codonopsis grey-wilsonii	KC282815.1					Lobelia leschenaultiana	DQ356131.1														Lobelia telekii	NC_035390.1
															Palmerella debilis	AY350635.1								Codonopsis henryi	KT970352.1					Lobelia linearis	NC_036075.1														Lobelia thapsoidea	KT957579.1	M. Aparecida da Silva & D. Alvarenga 4255 (MO)
															Pankycodon purpureus	KY071065.1	isolate BOP018002-3							Codonopsis hirsuta	KC435364.1	H10027				Lobelia linnaeoides	EF694722.1	Garnock-Jones 1													Lobelia thermalis	NC_036081.1
															Peracarpa carnosa	MK652059.1	isolate BOP104888							Codonopsis inflata	KT970345.1					Lobelia longisepala	NC_033371.1														Lobelia thuliniana	NC_033375.1
															Peracarpa carnosa var. circaeoides	HQ704549.1	Yoo75362							Codonopsis javanica	KF366848.1	258				Lobelia loochooensis	AB645960.1	specimen_: TNS:G.Kokubugata7000													Lobelia tomentosa	DQ356180.1
															Petromarula pinnata	KC455547.1	O:A.C. Sheen & H.M. Bendiksby 410							Codonopsis javanica subsp. japonica	KF366847.1	425				Lobelia lukwangulensis	NC_035376.1														Lobelia tupa	DQ356211.1
															Physoplexis comosa	KC455605.1	STU:M. Thiv 4035							Codonopsis kawakamii	KT970353.1					Lobelia macrodon	EF694727.1	Knox 5024B													Lobelia udzungwensis	NC_035392.1
															Phyteuma betonicifolium	KC455573.1	WU:F. Gugerli INTRABIODIV G19							Codonopsis lanceolata	FN397057.1	isolate CAM064				Lobelia malowensis	NC_036076.1														Lobelia urens	NC_035393.1
															Phyteuma charmelii	KC455584.1	WU:G.M. Schneeweiss, P. Sch nswetter & A. Tribsch 6431							Codonopsis micrantha	KC282834.1					Lobelia martagon	DQ356139.1														Lobelia villosa	DQ285176.1
															Phyteuma confusum	KC455641.1	STU:A. W rz 24.08.19.01							Codonopsis minima	KT970354.1					Lobelia melliana	NC_035377.1														Lobelia vivaldii	DQ285167.1
															Phyteuma cordatum	KC455579.1	WU:G.M. Schneeweiss, P. Sch nswetter & A. Tribsch 6371							Codonopsis ovata	KC282835.1					Lobelia mildbraedii	NC_035378.1														Lobelia wollastonii	NC_035394.1
															Phyteuma gallicum	KC455587.1	M:W. Lippert & D. Podlech 17687							Codonopsis pilosula	KC282810.1					Lobelia morogoroensis	NC_033372.1														Lobelia xalapensis	DQ356210.1
															Phyteuma globulariifolium	DQ304583.1								Codonopsis pilosula subsp. handeliana	KF366846.1	H10017				Lobelia muscoides	MF061201.1														Lobelia yuccoides	DQ285152.1
															Phyteuma globulariifolium subsp. globulariifolium	KC455617.1	WU:P. Sch nswetter & A. Tribsch 4883							Codonopsis pilosula subsp. tangshen	KF366857.1	2376				Lobelia nana	MH028859.1														Lobelia zeylanica	AB793519.1	specimen_: TNS:G.Kokubugata14127a
															Phyteuma globulariifolium subsp. pedemontanum	KC455618.1	WU:G.M. Schneeweiss, P. Sch nswetter & A. Tribsch 6508							Codonopsis purpurea	KC282811.1					Lobelia neglecta	KP110360.1														Lysipomia cuspidata	DQ356198.1
															Phyteuma hedraianthifolium	KC455626.1								Codonopsis rosulata	KC282812.1					Lobelia nicotianifolia	KT710195.1	M Mendum et al 99251 (GH)													Lysipomia sphagnophila	DQ356197.1
															Phyteuma hemisphaericum	KC455611.1	STU:M. Thiv 3882B							Codonopsis rotundifolia	KF366854.1	3797				Lobelia niihauensis	NC_035380.1														Merciera azurea	KC013607.1	Cupido 111, NBG
															Phyteuma humile	KC455615.1	WU:G.M. Schneeweiss 4861							Codonopsis subglobosa	KF366855.1	H11035				Lobelia nubigena	KT710191.1	LY Chen & GW Hu 034 (M)													Merciera brevifolia	KC013608.1	Cupido 235, NBG
															Phyteuma michelii	KC455578.1	WU:P. Sch nswetter & A. Tribsch 4691							Codonopsis subscaposa	KC282836.1					Lobelia oligophylla	DQ356159.1														Merciera eckloniana	KC013609.1	Cupido 76, NBG
															Phyteuma nigrum	KC455590.1	STU:M. Thiv s.n.							Codonopsis subsimplex	KF366856.1	20915092				Lobelia organensis	NC_035382.1														Merciera leptoloba	KC013610.1	Cupido 108, NBG
															Phyteuma orbiculare	KC455550.1	WU:G.M. Schneeweiss, P. Sch nswetter & A. Tribsch 3889							Codonopsis thalictrifolia	KC282814.1					Lobelia paludosa	KY627248.1	FLAS:Majure 5157													Merciera tenuifolia	JF747578.1
															Phyteuma ovatum	KC455569.1	WU:P. Sch nswetter & A. Tribsch 4581							Codonopsis tsinlingensis	KF366862.1	1646248				Lobelia patula	NC_036077.1														Michauxia campanuloides	GQ254929.1	isolate 1286
															Phyteuma persicifolium	KC455602.1	STU:A. W rz 24.06.16.01							Codonopsis tubulosa	KT970355.1					Lobelia petiolata	NC_035383.1														Michauxia tchihatchewii	EF088784.1	isolate CR92
															Phyteuma pseudorbiculare	KC455642.1	B:G. Parolly CN 85.61							Codonopsis ussuriensis	KT970329.1					Lobelia physaloides	KT626734.1	CHR:688756													Microcodon glomeratus	KC013611.1	Cupido 105, NBG
															Phyteuma pyrenaicum	KC455559.1	WU:G.M. Schneeweiss, P. Sch nswetter & A. Tribsch 6444							Codonopsis vinciflora	KC282816.1					Lobelia pleotricha	KT710193.1	T Zhang 10CS2108 (KUN)													Microcodon hispidulus	KC013614.1	Cupido 82, NBG
															Phyteuma scheuchzeri subsp. columnae	KC455633.1	WU:G.M. Schneeweiss, P. Sch nswetter & A. Tribsch 3914							Codonopsis viridiflora	KT970356.1					Lobelia polyphylla	DQ356123.1														Microcodon sp.	KC013613.1	2 JMP-2013 Cupido 197, NBG
															Phyteuma scheuchzeri subsp. scheuchzeri	KC455634.1	WU:P. Sch nswetter 11033							Codonopsis viridis	KF366866.1	4962				Lobelia portoricensis	DQ356142.1														Monopsis alba	NC_036082.1
															Phyteuma scorzonerifolium	KC455594.1	STU:M. Thiv 4023B							Cyananthus delavayi	KC282817.1					Lobelia proctorii	KT710192.1	A Argent 8998 &													Monopsis debilis	KC013663.1	Cupido s.n., NBG
															Phyteuma serratum	KC455623.1	WU:C. Dobes 4475							Cyananthus formosus	KC282818.1					Lobelia puberula	MF770611.1														Monopsis stellarioides subsp. schimperiana	MF770618.1
															Phyteuma sieberi	KC455638.1	WU:G.M. Schneeweiss, P. Sch nswetter & A. Tribsch 6208							Cyananthus hookeri	KT970357.1					Lobelia rhynchopetalum	NC_035384.1														Musschia aurea	EF088785.1	isolate CR93
															Phyteuma spicatum	KC455565.1	WU:P. Sch nswetter & M. Ronikier 10574							Cyananthus inflatus	KC282820.1					Lobelia ritabeaniana	NC_035385.1														Musschia isambertoi	KY091593.1	AZB:MI-DEDG-001
															Phyteuma tetramerum	KC455598.1	STU:F. Cernoch 47347							Cyananthus lichiangensis	KC282821.1					Lobelia roughii	EF694739.1	Glenny 8699													Musschia wollastonii	JF747583.1
															Phyteuma vagneri	KC455571.1								Cyananthus lobatus	KC282822.1					Lobelia sancta	NC_035386.1														Nesocodon mauritianus	JF747582.1
															Phyteuma villarsii	KC455583.1	WU:G.M. Schneeweiss & P. Sch nswetter 8911							Cyananthus longiflorus	KC282823.1					Lobelia seguinii	KU238158.1	J. Cai & L.S. Wang 09CS1025 (KUN)													Ostrowskia magnifica	KF028795.1	A23000
															Phyteuma zahlbruckneri	MK652065.1	isolate BOP104919							Cyananthus macrocalyx	KT970360.1					Lobelia sessilifolia	NC_035388.1														Palmerella debilis subsp. serrata	MF061222.1
															Platycodon grandiflorum	JF421532.1	PS0583MT02							Cyananthus pedunculatus	KT970361.1					Lobelia siphilitica	DQ006102.1	Beyersdorfer 185 US													Peracarpa carnosa	JN851185.1
															Platycodon grandiflorus	KP058319.1	JKTM-1-000071							Cyanea fissa	KY354213.1					Lobelia siphilitica var. siphilitica	KY354225.1														Peracarpa carnosa var. circaeoides	HQ704658.1	Yoo75152
															Porterella carnosula	MF964067.1	isolate CBP354							Cyanea leptostegia	MF061168.1					Lobelia sonderiana	DQ356130.1														Petkovia orphanidea	EF213340.1	Papanicolaou 134
															Pratia angulata	AY362767.1								Cyclocodon celebicus	KC282824.1					Lobelia sp.	L01931.2														Petromarula pinnata	FJ426585.1
															Pratia arenaria	AY568726.1								Cyclocodon lancifolium	FN397059.1	isolate N394				Lobelia spicata	NC_036080.1														Physoplexis comosa	KC455719.1	STU:M. Thiv 4035
															Pratia macrodon	AY568734.1								Cyclocodon lancifolius	KF028809.1	A6820_LI				Lobelia stricklandiae	NC_033374.1														Phyteuma betonicifolium	KC455686.1	WU:F. Gugerli INTRABIODIV G19
															Pratia perpusilla	AY568729.1								Cyphia angustiloba	MF770621.1					Lobelia stricta	DQ356141.1														Phyteuma charmelii	KC455694.1	WU:G.M. Schneeweiss, P. Schoenswetter & A. Tribsch 5581
															Pratia sp.	AY568733.1	AK 284861							Cyphia banksiana	MF770622.1					Lobelia stuhlmannii	NC_035389.1														Phyteuma confusum	KC455739.1	WU:P. Schoenswetter & A. Tribsch 3785
															Prismatocarpus brevilobus	KC013672.1	Duckitt s.n., NBG							Cyphia belfastica	MF770623.1					Lobelia taliensis	KT710190.1	EB Howell 139 (IBSC)													Phyteuma cordatum	KC455692.1	WU:G.M. Schneeweiss, P. Schoenswetter & A. Tribsch 6371
															Prismatocarpus campanuloides	KC013673.1	Cupido 219, NBG							Cyphia bulbosa var. bulbosa	MF770624.1					Lobelia telekii	NC_035390.1														Phyteuma gallicum	KC455700.1	M:W. Lippert & D. Podlech 17687
															Prismatocarpus crispus	KC013674.1	Manning 2651E, NBG							Cyphia crenata	NC_036089.1					Lobelia thapsoidea	NC_035391.1														Phyteuma globulariifolium	FJ426582.1
															Prismatocarpus diffusus	KC013675.1	Cupido 220, NBG							Cyphia dentariifolia	NC_036090.1					Lobelia thermalis	NC_036081.1														Phyteuma globulariifolium subsp. globulariifolium	KC455732.1	WU:P. Schoenswetter & A. Tribsch 4883
															Prismatocarpus fruticosus	KC013676.1	Cupido 118, NBG							Cyphia elata var. gerrardii	MF770627.1					Lobelia thuliniana	NC_033375.1														Phyteuma globulariifolium subsp. pedemontanum	KC455734.1	WU:P. Schoenswetter & A. Tribsch 4789
															Prismatocarpus nitidus	KC013677.1	Cupido 228, NBG							Cyphia glandulifera	MF770628.1					Lobelia tomentosa	EF141028.1	Dahlstrand 2600(GB)													Phyteuma hedraianthifolium	KC455741.1
															Prismatocarpus pedunculatus	KC013678.1	Cupido 273, NBG							Cyphia peteriana	FN397060.1	isolate CAM069				Lobelia tupa	DQ356145.1														Phyteuma hemisphaericum	KC455724.1	STU:M. Thiv 3912A
															Prismatocarpus schlechteri	KC013679.1	Cupido 237, NBG							Cyphia phyteuma	MF770629.1					Lobelia udzungwensis	NC_035392.1														Phyteuma humile	KC455730.1	WU:G.M. Schneeweiss, P. Schoenswetter & A. Tribsch 6533
															Prismatocarpus sessilis	KC013680.1	Cupido 112, NBG							Cyphia rupestris	KF028805.1	G3972				Lobelia urens	NC_035393.1														Phyteuma michelii	KC455691.1	WU:P. Schoenswetter & A. Tribsch 4691
															Pseudocodon convolvulaceus	KP793419.1	Dai 0018							Cyphia schlechteri	MF770630.1					Lobelia vivaldii	DQ268873.1	EB Knox 90													Phyteuma nigrum	KC455703.1	STU:M. Thiv s.n.
															Pseudocodon convolvulaceus subsp. forrestii	KP793421.1	Chiou 481A							Cyphia subtubulata	FN397061.1	isolate CAM115				Lobelia wollastonii	NC_035394.1														Phyteuma orbiculare	KC455665.1	WU:F. Schumacher 7178
															Pseudocodon graminifolius	KY071011.1	isolate BOP018022-3							Cyphia tortilis	MF770631.1					Lobelia xalapensis	DQ356144.1														Phyteuma ovatum	KC455705.1	STU:M. Thiv 3891
															Pseudocodon hirsutus	KY071078.1	isolate BOP018060							Cyphia tysonii	FN397062.1	isolate CAM116				Lobelia yuccoides	MF061221.1														Phyteuma persicifolium	KC455688.1	WU:G.M. Schneeweiss & P. Schoenswetter 6306
															Pseudocodon petiolatus	KP793423.1	isolate barcode 01173946 Q-T Expedition 13331 (PE)							Dialypetalum floribundum	MF061169.1					Lobelia zeylanica	AB645972.1	specimen_: TNS:G.Kokubugata8989													Phyteuma pseudorbiculare	KC455752.1	WU:B. Frajman & M. Turjak 11084
															Pseudocodon retroserratus	KP793425.1	Hong, Ma & Wang H11038							Diastatea micrantha	MF061170.1					Lysipomia cuspidata	DQ356133.1														Phyteuma pyrenaicum	KC455671.1	WU:G.M. Schneeweiss, P. Schoenswetter & A. Tribsch 6444
															Pseudocodon rosulatus	KY071106.1	isolate BOP018033-2							Echinocodon lobophyllus	KC282826.1					Lysipomia pumila	EF174608.1	Ayers 1184													Phyteuma scheuchzeri	MK556563.1	BOP104908
															Rhigiophyllum squarrosum	KC013681.1	Cupido 106, NBG							Edraianthus graminifolius	JX915215.1	isolate NC3351				Lysipomia sphagnophila	EF174609.1	Sanchez-Vega 8799													Phyteuma scheuchzeri subsp. columnae	KC455716.1	WU:P. Schoenswetter 11038
															Roella amplexicaulis	KC013682.1	Cupido 122, NBG							Edraianthus parnassicus	JX914925.1	isolate CAM405				Merciera azurea	KP110372.1														Phyteuma scheuchzeri subsp. scheuchzeri	KC455759.1	STU:M. Thiv 4016A
															Roella arenaria	KC013683.1	Cupido s.n., NBG							Edraianthus pumilio	FN397063.1	isolate CAM063				Merciera brevifolia	AM234939.1	specimen Cupido C. 235 (NBG)													Phyteuma scorzonerifolium	KC455689.1	WU:P. Schoenswetter & A. Tribsch 4704
															Roella cuspidata	KC013684.1	Cupido 234, NBG							Edraianthus tenuifolius	FN397064.1	isolate CAM117				Merciera tenuifolia	AY655153.1														Phyteuma serratum	KC455761.1	STU:M. Thiv 4136
															Roella glomerata	JX536235.1	isolate U10							Feeria angustifolia	JX914795.1	isolate CAM266				Michauxia tchihatchewii	EU713346.1														Phyteuma sieberi	KC455762.1	STU:M. Thiv 4038
															Roella incurva	KC013685.1	Cupido 200, NBG							Githopsis diffusa	JX915141.1	isolate HAB09				Microcodon glomeratum	AM234940.1	specimen Cupido C. 237 (NBG)													Phyteuma spicatum	JX445920.1
															Roella muscosa	KC013686.1	Cupido 232, NBG							Githopsis diffusa subsp. robusta	JX914941.1	isolate CAM422				Monopsis alba	NC_036082.1														Phyteuma tetramerum	KC455711.1	STU:F. Cernoch 47347
															Roella prostrata	KC013687.1	Cupido 208, NBG							Githopsis pulchella	JX915132.1	isolate 38T				Monopsis debilis	AM234941.1	specimen LHMS 456 (NBG)													Phyteuma vagneri	KC455684.1
															Roella psammophila	KC013688.1	Cupido 216, NBG							Githopsis specularioides	JX914940.1	isolate CAM421				Monopsis debilis var. debilis	MF770616.1														Phyteuma villarsii	KC455696.1	WU:G.M. Schneeweiss & P. Schoenswetter 8911
															Roella secunda	KC013689.1	Cupido 285, NBG							Grammatotheca bergiana	FN397066.1	isolate CAM015				Monopsis flava	MF770617.1														Phyteuma zahlbruckneri	MK556566.1	BOP104919
															Roella sp.	KC013692.1	JMP-2013 Cupido 223, NBG							Hanabusaya asiatica	JX915148.1	isolate 39T				Monopsis stellarioides subsp. schimperiana	MF770618.1														Platycodon grandiflorum	HQ704674.1	Yoo75370
															Roella spicata	KC013690.1	Cupido 245, NBG							Heterocodon rariflorum	JX914839.1	isolate CAM316				Musschia aurea	AY655154.1														Platycodon grandiflorus	EF088788.1	isolate CR96
															Roella squarrosa	KC013691.1	Cupido 229, NBG							Hippobroma longiflora	JX914672.1	isolate CAM120				Musschia isambertoi	KY091542.1	AZB:MI-DEDG-001													Platycodon grandiflorus f. albiflorus	HQ704660.1	Yoo75345
															Sergia regelii	MK652094.1	isolate BOP205727							Homocodon pedicellatus	KT970363.1					Musschia wollastonii	KY091547.1	AZB:MW-MDET-005													Pratia angulata	GQ984056.1
															Sergia sewerzowii	MK652095.1	isolate BOP205728							Hypsela tridens	MF061174.1					Nemacladus glanduliferus	MF963179.1	isolate CBP172													Pratia nummularia	MF061203.1
															Siphocodon spartioides	KC013693.1	Cupido133, NBG							Isotoma axillaris	FN397067.1	isolate CAM020				Nemacladus interior	KF724235.1	Ahart 10371 (NY)													Prismatocarpus brevilobus	KC013615.1	Duckitt s.n., NBG
															Symphyandra hofmannii	DQ304577.1								Isotoma fluviatilis	FN397068.1	isolate CAM021				Nemacladus ramosissmus	L18791.1														Prismatocarpus campanuloides	KC013616.1	Cupido 219, NBG
															Theilera guthriei	KC013696.1	Cupido 279, NBG							Isotoma hypocrateriformis	MF061176.1	isolate K5274				Nesocodon mauritianus	EU713421.1														Prismatocarpus crispus	KC013617.1	Manning 2651E, NBG
															Theilera robusta	KC013697.1	Cupido 317, NBG							Isotoma tridens	NC_035362.1					Ostrowskia magnifica	KF366832.1	Kamelin													Prismatocarpus diffusus	KC013618.1	Cupido 220, NBG
															Trachelium caeruleum	KY091371.1	AZB:TC-SMAP-001							Jasione crispa	JX915150.1	isolate 41T				Palmerella debilis subsp. serrata	MF061222.1														Prismatocarpus fruticosus	KC013619.1	Cupido 118, NBG
															Treichelia dodii	KC013694.1	Cupido 83, NBG							Jasione heldreichii	JX914938.1	isolate CAM419				Codonopsis purpurea	KC282773.1														Prismatocarpus nitidus	KC013620.1	Cupido 228, NBG
															Treichelia longibracteata	KC013695.1	Cupido 199, NBG							Jasione laevis	FN397069.1	isolate CAM113				Pankycodon purpureus	KY070673.1	isolate BOP018002-3													Prismatocarpus pedunculatus	KC013621.1	Cupido 273, NBG
															Trematolobelia macrostachys	EU219382.1								Jasione montana	JX915216.1	isolate NC3352				Pentaphragma ellipiticum	L18794.1														Prismatocarpus schlechteri	KC013622.1	Cupido 237, NBG
															Triodanis perfoliata	MG219450.1	CCDB-18327-G6							Jasione montana subsp. echinata	JX914807.1	isolate CAM280				Peracarpa carnosa	JN851180.1														Prismatocarpus sessilis	KC013623.1	Cupido 112, NBG
															Wahlenbergia acaulis	HQ823460.1								Legousia falcata	JX915153.1	isolate 45T				Peracarpa carnosa var. circaeoides	KC146538.1	Yoo75362													Prismatocarpus sp.	KC013624.1	JMP-2013 Cupido 241, NBG
															Wahlenbergia adpressa	HQ823461.1								Legousia pentagonia	JX915142.1	isolate HAB10				Petromarula pinnata	EU713433.1														Pseudonemacladus oppositifolius	GQ984066.1
															Wahlenbergia akaroa	JN379852.1	Wilson 2 WELT							Legousia speculum-veneris	FN397071.1	isolate CAM114				Phelline lucida	AJ238347.1														Rhigiophyllum squarrosum	KC013625.1	Cupido 106, NBG
															Wahlenbergia albomarginata subsp. albomarginata	JN379853.1	Prebble 0983 WELT							Leptocodon hirsutus	KC282827.1					Physoplexis comosa	EU713362.1														Roella amplexicaulis	KC013626.1	Cupido 122, NBG
															Wahlenbergia albomarginata subsp. flexilis	JN379865.1	Prebble 09118b WELT							Lithotoma petraea	NC_033365.1					Phyteuma orbiculare	KF997454.1	isolate BF77													Roella arenaria	KC013627.1	Cupido s.n., NBG
															Wahlenbergia albomarginata subsp. laxa	HQ823447.1								Lobelia aberdarica	NC_035365.1					Phyteuma ovatum	HG417023.1	MIB:ZPL:03524													Roella ciliata	EF088789.1	isolate CR97
															Wahlenbergia albomarginata subsp. olivina	JN379878.1	Prebble 0973b WELT							Lobelia acrochila	NC_035366.1					Phyteuma scheuchzeri	HG417024.1	MIB:ZPL:03505													Roella cuspidata	KC013629.1	Cupido 234, NBG
															Wahlenbergia androsacea	HQ823462.1								Lobelia anceps	NC_033366.1					Phyteuma scorzonerifolium	MK555465.1	BOP104911													Roella glomerata	KC147796.1	U10 (J)
															Wahlenbergia annularis	HQ823463.1								Lobelia bambuseti	MF061181.1					Phyteuma spicatum	EU643712.1														Roella incurva	KC013630.1	Cupido 200, NBG
															Wahlenbergia appressifolia	KC013698.1	Cupido 358, NBG							Lobelia baumannii	MF770633.1					Platycodon grandiflorus	EU713358.1														Roella muscosa	KC013631.1	Cupido 232, NBG
															Wahlenbergia axillaris	HQ823464.1								Lobelia bequaertii	MF061182.1					Platycodon grandiflorum	GQ436427.1	PS0583MT02													Roella prostrata	KC013632.1	Cupido 208, NBG
															Wahlenbergia capensis	HQ823465.1								Lobelia boninensis	KY354217.1					Platycodon grandiflorus f. albiflorus	KC146530.1	Yoo75345													Roella psammophila	KC013633.1	Cupido 216, NBG
															Wahlenbergia capillacea	HQ823466.1								Lobelia burttii subsp. burttii	MF061183.1					Porterella carnosula	MF963292.1	isolate CBP354													Roella secunda	KC013634.1	Cupido 285, NBG
															Wahlenbergia cartilaginea	JN379858.1	Prebble 09117b WELT							Lobelia burttii subsp. meruensis	MF061184.1					Pratia angulata	MF061180.1														Roella sp.	KC013638.1	JMP-2013 Cupido 223, NBG
															Wahlenbergia ceracea	JN379859.1	Prebble 0937d WELT							Lobelia burttii subsp. telmaticola	MF061185.1					Pratia borneensis	AF042665.1														Roella spicata	KC013635.1	Cupido 245, NBG
															Wahlenbergia cernua	HQ823467.1								Lobelia cardinalis	NC_036097.1					Pratia nummularia	AB645967.1	specimen_: TNS:G.Kokubugata8831													Roella squarrosa	KC013636.1	Cupido 229, NBG
															Wahlenbergia cinerea	HQ823468.1								Lobelia chinensis	NC_035370.1					Pratia purpurascens	DQ356160.1														Roella triflora	KC013637.1	Cupido 226, NBG
															Wahlenbergia communis	HQ823440.1								Lobelia columnaris	MF061188.1	isolate Pz3103				Prismatocarpus brevilobus	KP110417.1														Sclerotheca arborea	MG053367.1	isolate Y46
															Wahlenbergia congesta subsp. haastii	HQ823446.1								Lobelia davidii	NC_035372.1					Prismatocarpus diffusus	AY655157.1														Sclerotheca cf. arborea	MG053366.1	Y45
															Wahlenbergia cuspidata	HQ823469.1								Lobelia deckenii	FN397072.1	isolate N439				Prismatocarpus fruticosus	EU713406.1														Sclerotheca forsteri	MG053369.1	isolate Y49
															Wahlenbergia densifolia	HQ823441.1								Lobelia deckenii subsp. deckenii	MF061190.1					Prismatocarpus schlechteri	AM234942.1	specimen Cupido C. 237 (NBG)													Sclerotheca jayorum	DQ285156.1
															Wahlenbergia depressa	HQ823470.1								Lobelia deckenii subsp. incipiens	MF061191.1					Prismatocarpus sessilis	EU713403.1														Sclerotheca longistigmata	MG053362.1	isolate Y41
															Wahlenbergia desmantha	HQ823471.1								Lobelia doniana	NC_035373.1					Codonopsis graminifolia	KC435402.1	H10028													Sclerotheca magdalenae	MG053370.1	isolate Y50
															Wahlenbergia ecklonii	HQ823472.1								Lobelia erinus	NC_036098.1					Pseudocodon graminifolius	KY070699.1	isolate BOP018052													Sclerotheca margareta	MG053365.1	isolate Y43
															Wahlenbergia exilis	HQ823473.1								Lobelia fervens subsp. fervens	MF770602.1					Codonopsis grey-wilsonii	KC282777.1														Sclerotheca oreades	MG053372.1	isolate Y53
															Wahlenbergia fruticosa	HQ823474.1								Lobelia galpinii	NC_036071.1					Codonopsis hirsuta	KC435409.1	H10036													Sclerotheca sp.	MG053375.1	Y56
															Wahlenbergia gloriosa	HQ823444.1								Lobelia gibberoa	NC_035374.1					Pseudocodon hirsutus	KY070686.1	isolate BOP018021-2													Sclerotheca viridiflora	MF061223.1
															Wahlenbergia gracilis	JN379868.1	Prebble 0901 WELT							Lobelia gregoriana subsp. elgonensis	MF061194.1					Pseudocodon retroserratus	KP793438.1	Hong, Ma & Wang H11038													Siphocampylus affinis	DQ356223.1
															Wahlenbergia hederacea	HQ407556.1	isolate WA01							Lobelia gregoriana subsp. gregoriana	MF061195.1					Codonopsis rosulata	KC282774.1														Siphocampylus brevicalyx	DQ356224.1
															Wahlenbergia krebsii	JX536236.1	isolate C814							Lobelia gregoriana subsp. sattimae	KY354218.1					Pseudocodon rosulatus	KY070715.1	isolate BOP018033-4													Siphocampylus fulgens	DQ356216.1
															Wahlenbergia littoricola	JN379871.1	Prebble 0961 WELT							Lobelia hartlaubii	NC_036072.1					Codonopsis vinciflora	KC435412.1	H10001													Siphocampylus giganteus	DQ356222.1
															Wahlenbergia littoricola subsp. vernicosa	JN379897.1	de Lange 7589 AK							Lobelia heterophylla subsp. heterophylla	MF770605.1					Pseudonemacladus oppositifolius	EU713372.1														Siphocampylus krauseanus	NC_035760.1	Smith & Leiva 509
															Wahlenbergia lobelioides subsp. lobelioides	KY091375.1	AZB:WL-MDCI-001							Lobelia holstii	NC_036073.1					Rhigiophyllum squarrosum	AM234943.1	specimen Cupido C. 106 (NBG)													Siphocampylus macropodus	DQ356221.1
															Wahlenbergia lobulata	KC013700.1	Cupido 352, NBG							Lobelia inflata	FN397073.1	isolate CAM035				Roella amplexicaulis	AM234944.1	specimen Cupido C. 122 (NBG)													Siphocampylus scandens	DQ356218.1
															Wahlenbergia longifolia	HQ823476.1								Lobelia jasionoides	NC_033369.1					Roella ciliata	EU713405.1														Siphocodon debilis	KC013639.1	Cupido 139, NBG
															Wahlenbergia luteola	JN379872.1	Prebble 0928a WELT							Lobelia kauaensis	MF061196.1					Roussea simplex	AJ235792.1														Siphocodon spartioides	KC013640.1	Cupido133, NBG
															Wahlenbergia marginata	HQ704542.1	Yoo75148							Lobelia laxa	NC_036074.1					Sclerotheca arborea	MG053320.1	isolate Y46													Solenopsis bivonae	MF061224.1
															Wahlenbergia matthewsii	JN379873.1	Prebble 2769a WELT							Lobelia laxiflora	NC_033370.1					Sclerotheca forsteri	MG053324.1	isolate Y49													Solenopsis laurentia	DQ356199.1
															Wahlenbergia multicaulis	JN379876.1	Prebble 0920 WELT							Lobelia linearis	NC_036075.1					Apetahia longistigmata	MF061165.1														Symphyandra hofmannii	GQ254931.1	isolate 1285
															Wahlenbergia neorigida	HQ823477.1								Lobelia longisepala	NC_033371.1					Sclerotheca longistigmata	MG053314.1	isolate Y41													Symphyandra pendula	JX445913.1
															Wahlenbergia oxyphylla	HQ823478.1								Lobelia lukwangulensis	NC_035376.1					Sclerotheca magdalenae	MG053325.1	isolate Y50													Symphyandra zangezura	EF213342.1	SS-04-12
															Wahlenbergia paniculata	HQ823479.1								Lobelia malowensis	NC_036076.1					Sclerotheca margareta	MG053317.1	isolate Y58													Theilera guthriei	KC013643.1	Cupido 279, NBG
															Wahlenbergia parvifolia	HQ823480.1								Lobelia melliana	NC_035377.1					Sclerotheca oreades	MG053327.1	isolate Y53													Theilera robusta	KC013644.1	Cupido 317, NBG
															Wahlenbergia pilosa	KC013701.1	Cupido 272, NBG							Lobelia mildbraedii	NC_035378.1					Apetahia raiateensis	MG053318.1	isolate Y57													Trachelium caeruleum	EF088791.1	isolate CR99
															Wahlenbergia planiflora	JN379880.1	Prebble 0947 WELT							Lobelia morogoroensis	NC_033372.1					Apetahia seigelii	MG053319.1	isolate Y44													Treichelia dodii	KC013641.1	Cupido 83, NBG
															Wahlenbergia polyantha	HQ823481.1								Lobelia muscoides	NC_035379.1					Sclerotheca sp.	MG053329.1	Y56													Treichelia longibracteata	KC013642.1	Cupido 199, NBG
															Wahlenbergia polytrichifolia	KC013702.1	Cupido 349, NBG							Lobelia nana	KF028804.1	A6780				Sclerotheca viridiflora	MF061223.1														Trematolobelia kauaiensis	DQ285153.1
															Wahlenbergia procumbens	HQ823482.1								Lobelia niihauensis	NC_035380.1					Siphocampylus affinis	DQ356155.1														Trematolobelia macrostachys	DQ285154.1
															Wahlenbergia psammophila	HQ823483.1								Lobelia organensis	NC_035382.1					Siphocampylus andinus	KU670782.1	isolate LL94													Triodanis biflora	MK556597.1	BOP205723
															Wahlenbergia pygmaea subsp. drucei	JN379862.1	Prebble 09107 WELT							Lobelia patula	NC_036077.1					Siphocampylus angustiflorus	KU670785.1	isolate LL196													Triodanis leptocarpa	MK556567.1	BOP104973
															Wahlenbergia pygmaea subsp. pygmaea	JN379882.1	Garnock-Jones 2770c WELT							Lobelia petiolata	NC_035383.1					Siphocampylus aureus	KU670786.1	isolate LL111													Triodanis perfoliata	MK556598.1	BOP205724
															Wahlenbergia pygmaea subsp. tararua	JN379893.1	09104a WELT							Lobelia physaloides	MF770620.1					Siphocampylus betulifolius	KU670788.1	isolate 88													Wahlenbergia acaulis	HQ823495.1
															Wahlenbergia ramosa	JN379885.1	Prebble 0948 WELT							Lobelia polyphylla	KY354224.1					Siphocampylus bilabiatus	KU670789.1	isolate LL89													Wahlenbergia adpressa	HQ823496.1
															Wahlenbergia rupestris	JN379887.1	Prebble 0970 WELT							Lobelia puberula	MF770611.1					Siphocampylus brevicalyx	DQ356156.1														Wahlenbergia akaroa	HQ823497.1
															Wahlenbergia rupicola	JN379888.1	Plunkett 25 NE							Lobelia rhynchopetalum	FN397075.1	isolate CAM014				Siphocampylus citrinus	KU670792.1	isolate LL179													Wahlenbergia albomarginata subsp. albomarginata	JN379904.1	Rodriguez 209d WELTU
															Wahlenbergia sp.	MF785675.1	US:3559084							Lobelia ritabeaniana	NC_035385.1					Siphocampylus clotho	KU670791.1	isolate LL245													Wahlenbergia albomarginata subsp. flexilis	JN379913.1	Prebble 09118a WELT
															Wahlenbergia squamifolia	KC013703.1	Cupido 342, NBG							Lobelia sancta	NC_035386.1					Siphocampylus corymbifer	KU670796.1	isolate LL91													Wahlenbergia albomarginata subsp. laxa	HQ823522.1
															Wahlenbergia stricta	JN379891.1	Prebble 0915 WELT							Lobelia seguinii	NC_035387.1					Siphocampylus ecuadorensis	EF174617.1	Muchhala 175													Wahlenbergia albomarginata subsp. olivina	HQ823528.1
															Wahlenbergia subulata	HQ823484.1								Lobelia sessilifolia	NC_035388.1					Siphocampylus elfriedii	KU670793.1	isolate LL185													Wahlenbergia androsacea	HQ823499.1
															Wahlenbergia suffruticosa	KC013704.1	Cupido 209, NBG							Lobelia siphilitica var. siphilitica	KY354225.1					Siphocampylus flagelliformis	KU670794.1	isolate LL92													Wahlenbergia annularis	HQ823500.1
															Wahlenbergia telfordii	HQ823457.1								Lobelia sonderiana	NC_036079.1					Siphocampylus fulgens	EF141032.1	Hatschbach 44995(GB)													Wahlenbergia appressifolia	KC013645.1	Cupido 358, NBG
															Wahlenbergia tenella	HQ823485.1								Lobelia spicata	NC_036080.1					Siphocampylus giganteus	DQ356154.1														Wahlenbergia arenaria	MK556568.1	BOP104993
															Wahlenbergia tenerrima	HQ823486.1								Lobelia stricklandiae	NC_033374.1					Siphocampylus jelskii	KU670795.1	isolate LL159													Wahlenbergia axillaris	HQ823501.1
															Wahlenbergia thunbergiana	HQ823487.1								Lobelia stuhlmannii	NC_035389.1					Siphocampylus krauseanus	NC_035760.1	Smith & Leiva 509													Wahlenbergia buseriana	KC013646.1	Cupido 263, NBG
															Wahlenbergia thunbergii	KC013705.1	Forest s.n., NBG							Lobelia telekii	NC_035390.1					Siphocampylus lycioides	KU670798.1	isolate 122													Wahlenbergia capensis	HQ823502.1
															Wahlenbergia undulata	HQ823488.1								Lobelia thapsoidea	NC_035391.1					Siphocampylus macropodus	DQ356153.1														Wahlenbergia capillacea	HQ823503.1
															Wahlenbergia violacea	JN379898.1	Meudt 282 WELT							Lobelia thermalis	NC_036081.1					Siphocampylus manettiiflorus	KU670799.1	isolate LL48													Wahlenbergia cartilaginea	JN379905.1	Prebble 09117a WELT
															Wahlenbergia virgata	HQ823489.1								Lobelia thuliniana	NC_033375.1					Siphocampylus matthiaei	KU670807.1	isolate 124													Wahlenbergia ceracea	JN379908.1	Prebble 0941 WELT
															Zeugandra iranica	JX987520.1	3776.2-IRAN							Lobelia udzungwensis	NC_035392.1					Siphocampylus rosmarinifolius	KU670801.1	isolate LL162													Wahlenbergia cernua	HQ823506.1
																								Lobelia urens	NC_035393.1					Siphocampylus rusbyanus	KU670802.1	isolate LL187													Wahlenbergia cinerea	HQ823507.1
																								Lobelia wollastonii	NC_035394.1					Siphocampylus scandens	DQ356150.1														Wahlenbergia communis	HQ823508.1
																								Lobelia yuccoides	MF061221.1					Siphocampylus smilax	KU670803.1	isolate LL95													Wahlenbergia congesta subsp. haastii	JN379920.1	Prebble 0986b WELT
																								Michauxia campanuloides	FN397076.1	isolate CAM118				Siphocampylus sparsipilus	KU670804.1	isolate LL96													Wahlenbergia cuspidata	HQ823509.1
																								Michauxia laevigata	JX915042.1	isolate CAM573				Siphocampylus tunarensis	KU670752.1	isolate LL97													Wahlenbergia densifolia	JN379910.1	Prebble 0951a WELT
																								Michauxia nuda	JX915103.1	isolate CAM665				Siphocampylus tunicatus	KU670754.1	isolate LL98													Wahlenbergia depressa	HQ823511.1
																								Michauxia tchihatcheffii	JX914981.1	isolate CAM509				Siphocampylus tupaeformis	EF174615.1	Royal Botanic Gardens, Kew (RBG) 1986-6038													Wahlenbergia desmantha	HQ823512.1
																								Monopsis alba	NC_036082.1					Siphocampylus vatkeanus	KU670753.1	isolate LL53													Wahlenbergia ecklonii	HQ823514.1
																								Monopsis debilis var. debilis	MF770616.1					Siphocampylus veteranus	KU670781.1	isolate LL186													Wahlenbergia exilis	HQ823515.1
																								Monopsis stellarioides subsp. schimperiana	MF770618.1					Siphocampylus virgatus	KU670755.1	isolate LL167													Wahlenbergia fruticosa	HQ823517.1
																								Musschia aurea	JX915154.1	isolate 48T				Siphocodon debilis	AM234945.1	specimen Cupido C. 139 (NBG)													Wahlenbergia gloriosa	JN379915.1	Prebble 0960a WELT
																								Musschia wollastonii	FN397078.1	isolate CAM022				Siphocodon spartioides	EU713413.1														Wahlenbergia gracilis	JN379918.1	Prebble 0913 WELT
																								Nesocodon mauritianus	FN397079.1	isolate CAM024				Solenopsis bivonae	MF061224.1														Wahlenbergia hederacea	EF088792.1	isolate CR100
																								Ostrowskia magnifica	KF028810.1	A23000				Solenopsis laurentia	DQ356134.1														Wahlenbergia huttonii	KC013647.1	Cupido 304, NBG
																								Palmerella debilis subsp. serrata	MF061222.1					Solenopsis minuta	EU713369.1														Wahlenbergia juncea	KC013648.1	Cupido 296, NBG
																								Peracarpa carnosa	KT970365.1					Theilera guthriei	EU713409.1														Wahlenbergia krebsii	KC147797.1	C814 (J)
																								Peracarpa carnosa var. circaeoides	KT970330.1					Trachelium caeruleum	EU713435.1														Wahlenbergia littoricola subsp. vernicosa	JN379958.1	de Lange 7589 AK
																								Petromarula pinnata	FN397081.1	isolate CAM027				Treichelia longebracteata	AM234946.1	specimen Cupido C. sn (NBG)													Wahlenbergia lobelioides	JX445922.1
																								Physoplexis comosa	FN397082.1	isolate CAM002				Trematolobelia kauaiensis	NC_035398.1														Wahlenbergia lobulata	KC013649.1	Cupido 352, NBG
																								Phyteuma aff. Orbiculare	FN397083.1	CAM009 isolate CAM009				Trematolobelia macrostachys	DQ356137.1														Wahlenbergia longifolia	HQ823524.1
																								Phyteuma betonicifolium	FN397084.1	isolate CAM087				Triodanis coloradoensis	EU713364.1														Wahlenbergia luteola	JN379927.1	Prebble 0966 WELT
																								Phyteuma hemisphaericum	FN397085.1	isolate CAM058				Triodanis perfoliata	EU713363.1														Wahlenbergia marginata	MK556569.1	BOP104999
																								Phyteuma humile	JX915214.1	isolate NC3345				Wahlenbergia albomarginata	KT626798.1	CHR:617821													Wahlenbergia matthewsii	JN379930.1	Prebble 2769b WELT
																								Phyteuma ovatum	JX915213.1	isolate NC3344				Wahlenbergia angustifolia	EU713412.1														Wahlenbergia multicaulis	JN379932.1	Prebble 0920 WELT
																								Phyteuma scheuchzeri	FN397086.1	isolate CAM055				Wahlenbergia berteroi	EU713423.1														Wahlenbergia neorigida	HQ823527.1
																								Phyteuma spicatum	KJ512606.1	isolate Seq10				Wahlenbergia capensis	AM234947.1	specimen LHMS 1309 (NBG)													Wahlenbergia nodosa	KC013650.1	Cupido 144, NBG
																								Platycodon grandiflorum	FN397087.1	isolate CAM003				Wahlenbergia gloriosa	AY655161.1														Wahlenbergia oxyphylla	HQ823529.1
																								Platycodon grandiflorus f. albiflorus	KT970331.1					Wahlenbergia hederacea	EU643708.1														Wahlenbergia paniculata	HQ823530.1
																								Porterella carnosula	KY354228.1					Wahlenbergia linifolia	EU713424.1														Wahlenbergia parvifolia	HQ823531.1
																								Pratia angulata	MF061180.1					Wahlenbergia lobelioides	EU643707.1														Wahlenbergia planiflora	JN379937.1	Prebble 0949 WELT
																								Pratia nummularia	FN397088.1	isolate CAM017				Wahlenbergia lobelioides subsp. lobelioides	KY091569.1	LISC:7068													Wahlenbergia polyantha	HQ823532.1
																								Prismatocarpus pedunculatus	JX914796.1	isolate CAM267				Wahlenbergia macrostachys	KP110501.1														Wahlenbergia polytrichifolia	KC013651.1	Cupido 349, NBG
																								Pseudocodon convolvulaceus	KP793429.1	Dai 0018				Wahlenbergia marginata	KC146531.1	Yoo75148													Wahlenbergia procumbens	HQ823533.1
																								Pseudocodon convolvulaceus subsp. forrestii	KP793430.1	Cheng 92396				Wahlenbergia neorigida	KP110502.1														Wahlenbergia psammophila	HQ823534.1
																								Pseudocodon retroserratus	KP793433.1	Hong, Ma & Wang H11038				Wahlenbergia sp.	MF786763.1	US:3559084													Wahlenbergia pygmaea subsp. drucei	HQ823513.1
																								Roella decurrens	JX914797.1	isolate CAM268				Wahlenbergia unidentata	KP110503.1														Wahlenbergia pygmaea subsp. pygmaea	JN379939.1	Garnock-Jones 2770b WELT
																								Sclerotheca viridiflora	MF061223.1					Wimmerella hederacea	NC_033377.1														Wahlenbergia pygmaea subsp. tararua	JN379950.1	09104b WELT
																								Siphocampylus krauseanus	NC_035760.1	Smith & Leiva 509				Wimmerella pygmaea	AM234948.1	specimen Cupido C. 129 (NBG)													Wahlenbergia ramosa	JN379942.1	Prebble 09105b WELT
																								Siphocampylus manettiiflorus	FN397089.1	isolate CAM016				Zeugandra iranica	KT970183.1														Wahlenbergia ramulosa	KC013652.1	Cupido 256, NBG
																								Solenopsis antiphonitis	JX915096.1	isolate CAM651																			Wahlenbergia rubioides	KC013653.1	Cupido 215, NBG
																								Solenopsis bivonae	MF061224.1																				Wahlenbergia rupestris	JN379943.1	Prebble 09109a
																								Symphyandra hofmannii	FN397092.1	isolate CAM004																			Wahlenbergia rupicola	JN379954.1	Plunkett 25 NE
																								Trachelium caeruleum	JX914943.1	isolate CAM424																			Wahlenbergia sp.	HQ823539.1	Cupido 309
																								Trematolobelia kauaiensis	NC_035398.1																				Wahlenbergia squamifolia	KC013655.1	Cupido 342, NBG
																								Triodanis biflora	JX915144.1	isolate HAB12																			Wahlenbergia stellarioides	KC013654.1	Cupido 295, NBG
																								Triodanis coloradoensis	JX915145.1	isolate HAB13																			Wahlenbergia stricta	JN379948.1	Bruhl 2562 NE
																								Triodanis leptocarpa	JX915146.1	isolate HAB14																			Wahlenbergia subulata	HQ823541.1
																								Triodanis perfoliata	JX914840.1	isolate CAM317																			Wahlenbergia suffruticosa	KC013656.1	Cupido 209, NBG
																								Wahlenbergia hederacea	JX915241.1	isolate 56T																			Wahlenbergia telfordii	HQ823543.1
																								Wahlenbergia marginata	KC282829.1																				Wahlenbergia tenella	HQ823544.1
																								Wahlenbergia saxicola	FN397093.1	isolate CAM012																			Wahlenbergia tenerrima	HQ823545.1
																								Wahlenbergia sp.	JX915175.1	NC3198																			Wahlenbergia thunbergiana	HQ823546.1
																								Wimmerella hederacea	NC_033377.1																				Wahlenbergia tumidifructa	JN379953.1	May WELT
																								Zeugandra iranica	KT970368.1																				Wahlenbergia undulata	HQ823547.1
																																													Wahlenbergia unidentata	KC013657.1	Cupido 274, NBG
																																													Wahlenbergia violacea	HQ823549.1
																																													Wahlenbergia virgata	HQ823550.1
																																													Wimmerella hederacea	NC_033377.1
																																													Zeugandra iranica	KT970294.1
[truncated: 4 more columns]

## Sheet: Sheet 2
Lobelioideae taxa in the combined plastid dataset.
Taxon	Subfamilies	Tribe	Sub-Tribes	Ramus	Section	Ancestral region
Apetahia longistigmata	Lobelioideae	n/a	n/a	n/a	n/a	Pacific islands
Apetahia raiateensis	Lobelioideae	n/a	n/a	n/a	n/a	Pacific islands
Apetahia seigelii	Lobelioideae	n/a	n/a	n/a	n/a	Pacific islands
Brighamia insignis	Lobelioideae	Lobelieae	Brighamiinae	n/a	n/a	Pacific islands
Burmeistera auriculata	Lobelioideae	Delisseeae	Burmeisterinae	n/a	n/a	America
Burmeistera borjensis	Lobelioideae	Delisseeae	Burmeisterinae	n/a	n/a	America
Burmeistera ceratocarpa	Lobelioideae	Delisseeae	Burmeisterinae	n/a	n/a	America
Burmeistera crassifolia	Lobelioideae	Delisseeae	Burmeisterinae	n/a	n/a	America
Burmeistera crispiloba	Lobelioideae	Delisseeae	Burmeisterinae	n/a	n/a	America
Burmeistera cyclostigmata	Lobelioideae	Delisseeae	Burmeisterinae	n/a	n/a	America
Burmeistera cylindrocarpa	Lobelioideae	Delisseeae	Burmeisterinae	n/a	n/a	America
Burmeistera domingensis	Lobelioideae	Delisseeae	Burmeisterinae	n/a	n/a	America
Burmeistera fuscoapicata	Lobelioideae	Delisseeae	Burmeisterinae	n/a	n/a	America
Burmeistera glabrata	Lobelioideae	Delisseeae	Burmeisterinae	n/a	n/a	America
Burmeistera holm nielsenii	Lobelioideae	Delisseeae	Burmeisterinae	n/a	n/a	America
Burmeistera loejtnantii	Lobelioideae	Delisseeae	Burmeisterinae	n/a	n/a	America
Burmeistera lutosa	Lobelioideae	Delisseeae	Burmeisterinae	n/a	n/a	America
Burmeistera multiflora	Lobelioideae	Delisseeae	Burmeisterinae	n/a	n/a	America
Burmeistera oyacachensis	Lobelioideae	Delisseeae	Burmeisterinae	n/a	n/a	America
Burmeistera parviflora	Lobelioideae	Delisseeae	Burmeisterinae	n/a	n/a	America
Burmeistera pirrensis	Lobelioideae	Delisseeae	Burmeisterinae	n/a	n/a	America
Burmeistera refracta	Lobelioideae	Delisseeae	Burmeisterinae	n/a	n/a	America
Burmeistera resupinata	Lobelioideae	Delisseeae	Burmeisterinae	n/a	n/a	America
Burmeistera resupinata subsp resupinata	Lobelioideae	Delisseeae	Burmeisterinae	n/a	n/a	America
Burmeistera rubrosepala	Lobelioideae	Delisseeae	Burmeisterinae	n/a	n/a	America
Burmeistera smaragdi	Lobelioideae	Delisseeae	Burmeisterinae	n/a	n/a	America
Burmeistera sodiroana	Lobelioideae	Delisseeae	Burmeisterinae	n/a	n/a	America
Burmeistera sp.	Lobelioideae	Delisseeae	Burmeisterinae	n/a	n/a	America
Burmeistera succulenta	Lobelioideae	Delisseeae	Burmeisterinae	n/a	n/a	America
Burmeistera truncata	Lobelioideae	Delisseeae	Burmeisterinae	n/a	n/a	America
Burmeistera variabilis	Lobelioideae	Delisseeae	Burmeisterinae	n/a	n/a	America
Burmeistera zurquiensis	Lobelioideae	Delisseeae	Burmeisterinae	n/a	n/a	America
Centropogon aequatorialis	Lobelioideae	Delisseeae	Burmeisterinae	n/a	n/a	America
Centropogon argutus	Lobelioideae	Delisseeae	Burmeisterinae	n/a	n/a	America
Centropogon baezanus	Lobelioideae	Delisseeae	Burmeisterinae	n/a	n/a	America
Centropogon brittonianus	Lobelioideae	Delisseeae	Burmeisterinae	n/a	n/a	America
Centropogon coccineus	Lobelioideae	Delisseeae	Burmeisterinae	n/a	n/a	America
Centropogon comosus	Lobelioideae	Delisseeae	Burmeisterinae	n/a	n/a	America
Centropogon cornutus	Lobelioideae	Delisseeae	Burmeisterinae	n/a	n/a	America
Centropogon costaricae	Lobelioideae	Delisseeae	Burmeisterinae	n/a	n/a	America
Centropogon dianae	Lobelioideae	Delisseeae	Burmeisterinae	n/a	n/a	America
Centropogon dissectus	Lobelioideae	Delisseeae	Burmeisterinae	n/a	n/a	America
Centropogon featherstonei	Lobelioideae	Delisseeae	Burmeisterinae	n/a	n/a	America
Centropogon ferrugineus	Lobelioideae	Delisseeae	Burmeisterinae	n/a	n/a	America
Centropogon gamosepalus	Lobelioideae	Delisseeae	Burmeisterinae	n/a	n/a	America
Centropogon glabrifilis	Lobelioideae	Delisseeae	Burmeisterinae	n/a	n/a	America
Centropogon gloriosus	Lobelioideae	Delisseeae	Burmeisterinae	n/a	n/a	America
Centropogon grandidentatus	Lobelioideae	Delisseeae	Burmeisterinae	n/a	n/a	America
Centropogon granulosus	Lobelioideae	Delisseeae	Burmeisterinae	n/a	n/a	America
Centropogon granulosus subsp granulosus	Lobelioideae	Delisseeae	Burmeisterinae	n/a	n/a	America
Centropogon granulosus subsp nutans	Lobelioideae	Delisseeae	Burmeisterinae	n/a	n/a	America
Centropogon gutierrezii	Lobelioideae	Delisseeae	Burmeisterinae	n/a	n/a	America
Centropogon hirtus	Lobelioideae	Delisseeae	Burmeisterinae	n/a	n/a	America
Centropogon leucocarpus	Lobelioideae	Delisseeae	Burmeisterinae	n/a	n/a	America
Centropogon llanganatensis	Lobelioideae	Delisseeae	Burmeisterinae	n/a	n/a	America
Centropogon luteus	Lobelioideae	Delisseeae	Burmeisterinae	n/a	n/a	America
Centropogon luteynii	Lobelioideae	Delisseeae	Burmeisterinae	n/a	n/a	America
Centropogon medusa	Lobelioideae	Delisseeae	Burmeisterinae	n/a	n/a	America
Centropogon nigricans	Lobelioideae	Delisseeae	Burmeisterinae	n/a	n/a	America
Centropogon peruvianus	Lobelioideae	Delisseeae	Burmeisterinae	n/a	n/a	America
Centropogon pulcher	Lobelioideae	Delisseeae	Burmeisterinae	n/a	n/a	America
Centropogon rex	Lobelioideae	Delisseeae	Burmeisterinae	n/a	n/a	America
Centropogon salviiformis	Lobelioideae	Delisseeae	Burmeisterinae	n/a	n/a	America
Centropogon simulans	Lobelioideae	Delisseeae	Burmeisterinae	n/a	n/a	America
Centropogon sodiroanus	Lobelioideae	Delisseeae	Burmeisterinae	n/a	n/a	America
Centropogon solanifolius	Lobelioideae	Delisseeae	Burmeisterinae	n/a	n/a	America
Centropogon sp.	Lobelioideae	Delisseeae	Burmeisterinae	n/a	n/a	America
Centropogon tessmannii	Lobelioideae	Delisseeae	Burmeisterinae	n/a	n/a	America
Centropogon trichodes	Lobelioideae	Delisseeae	Burmeisterinae	n/a	n/a	America
Centropogon valeri	Lobelioideae	Delisseeae	Burmeisterinae	n/a	n/a	America
Centropogon vargasii	Lobelioideae	Delisseeae	Burmeisterinae	n/a	n/a	America
Centropogon yarumalensis	Lobelioideae	Delisseeae	Burmeisterinae	n/a	n/a	America
Centropogon yungasensis	Lobelioideae	Delisseeae	Burmeisterinae	n/a	n/a	America
Clermontia arborescens	Lobelioideae	Delisseeae	Cyaneinae	n/a	Clermontioideae	Pacific islands
Clermontia arborescens subsp waihiae	Lobelioideae	Delisseeae	Cyaneinae	n/a	Clermontioideae	Pacific islands
Clermontia calophylla	Lobelioideae	Delisseeae	Cyaneinae	n/a	Clermontia	Pacific islands
Clermontia clermontioides subsp clermontioides	Lobelioideae	Delisseeae	Cyaneinae	n/a	Clermontioideae	Pacific islands
Clermontia drepanomorpha	Lobelioideae	Delisseeae	Cyaneinae	n/a	Clermontia	Pacific islands
Clermontia fauriei	Lobelioideae	Delisseeae	Cyaneinae	n/a	Clermontioideae	Pacific islands
Clermontia grandiflora subsp grandiflora	Lobelioideae	Delisseeae	Cyaneinae	n/a	Clermontia	Pacific islands
Clermontia kakeana	Lobelioideae	Delisseeae	Cyaneinae	n/a	Clermontia	Pacific islands
Clermontia kohalae	Lobelioideae	Delisseeae	Cyaneinae	n/a	Clermontia	Pacific islands
Clermontia lindseyana	Lobelioideae	Delisseeae	Cyaneinae	n/a	Clermontia	Pacific islands
Clermontia micrantha	Lobelioideae	Delisseeae	Cyaneinae	n/a	Clermontia	Pacific islands
Clermontia montis loa	Lobelioideae	Delisseeae	Cyaneinae	n/a	Clermontia	Pacific islands
Clermontia oblongifolia subsp oblongifolia	Lobelioideae	Delisseeae	Cyaneinae	n/a	Clermontia	Pacific islands
Clermontia parviflora	Lobelioideae	Delisseeae	Cyaneinae	n/a	Clermontia	Pacific islands
Clermontia peleana	Lobelioideae	Delisseeae	Cyaneinae	n/a	Clermontioideae	Pacific islands
Clermontia singuliflora	Lobelioideae	Delisseeae	Cyaneinae	n/a	n/a	Pacific islands
Clermontia tuberculata	Lobelioideae	Delisseeae	Cyaneinae	n/a	Clermontioideae	Pacific islands
Clermontia waimeae	Lobelioideae	Delisseeae	Cyaneinae	n/a	Clermontioideae	Pacific islands
Cyanea angustifolia	Lobelioideae	Delisseeae	Cyaneinae	n/a	n/a	Pacific islands
Cyanea asplenifolia	Lobelioideae	Delisseeae	Cyaneinae	n/a	n/a	Pacific islands
Cyanea coriacea	Lobelioideae	Delisseeae	Cyaneinae	n/a	n/a	Pacific islands
Cyanea fissa	Lobelioideae	Delisseeae	Cyaneinae	n/a	n/a	Pacific islands
Cyanea koolauensis	Lobelioideae	Delisseeae	Cyaneinae	n/a	n/a	Pacific islands
Cyanea leptostegia	Lobelioideae	Delisseeae	Cyaneinae	n/a	n/a	Pacific islands
Delissea rhytidosperma	Lobelioideae	Delisseeae	Cyaneinae	n/a	Delissea	Pacific islands
Dialypetalum floribundum	Lobelioideae	Lobelieae	Siphocampylinae	Cherosiphon	n/a	Africa
Dialypetalum sp.	Lobelioideae	Lobelieae	Siphocampylinae	Cherosiphon	n/a	Africa
Diastatea micrantha	Lobelioideae	Lobelieae	Siphocampylinae	Eusiphon	n/a	America
Downingia bacigalupii	Lobelioideae	Lobelieae	Howelliinae	Calanthes	n/a	America
Downingia cuspidata	Lobelioideae	Lobelieae	Howelliinae	Calanthes	n/a	America
Downingia elegans	Lobelioideae	Lobelieae	Howelliinae	Calanthes	n/a	America
Downingia insignis	Lobelioideae	Lobelieae	Howelliinae	Calanthes	n/a	America
Downingia laeta	Lobelioideae	Lobelieae	Howelliinae	Calanthes	n/a	America
Grammatotheca bergiana	Lobelioideae	Lobelieae	Siphocampylinae	Schizosiphon	n/a	Africa
Hippobroma longiflora	Lobelioideae	Lobelieae	Siphocampylinae	Eusiphon	n/a	America
Hypsela tridens	Lobelioideae	Delisseeae	Burmeisterinae	n/a	n/a	Australasia
Isotoma axillaris	Lobelioideae	Lobelieae	Siphocampylinae	Eusiphon	n/a	Australasia
Isotoma fluviatilis	Lobelioideae	Lobelieae	Siphocampylinae	Eusiphon	n/a	Australasia
Isotoma fluviatilis subsp australis	Lobelioideae	Lobelieae	Siphocampylinae	Eusiphon	n/a	Australasia
Isotoma fluviatilis subsp borealis	Lobelioideae	Lobelieae	Siphocampylinae	Eusiphon	n/a	Australasia
Isotoma fluviatilis subsp fluviatilis	Lobelioideae	Lobelieae	Siphocampylinae	Eusiphon	n/a	Australasia
Isotoma hypocrateriformis	Lobelioideae	Lobelieae	Siphocampylinae	Eusiphon	n/a	Australasia
Isotoma tridens	Lobelioideae	Lobelieae	Siphocampylinae	Eusiphon	n/a	Australasia
Legenere limosa	Lobelioideae	Lobelieae	Legenerinae	n/a	n/a	America
Legenere valdiviana	Lobelioideae	Lobelieae	Legenerinae	n/a	n/a	America
Lithotoma petraea	Lobelioideae	Lobelieae	n/a	n/a	n/a	Australasia
Lobelia aberdarica	Lobelioideae	Lobelieae	Siphocampylinae	Schizosiphon	Rhynchopetalum	Africa
Lobelia acrochila	Lobelioideae	Lobelieae	Siphocampylinae	Schizosiphon	Rhynchopetalum	Africa
Lobelia aguana	Lobelioideae	Lobelieae	Siphocampylinae	Schizosiphon	Homochilus	America
Lobelia anceps	Lobelioideae	Lobelieae	Siphocampylinae	Schizosiphon	Stenotium	Africa
Lobelia angulata	Lobelioideae	Lobelieae	Siphocampylinae	Schizosiphon	Hypsela	Australasia
Lobelia aquatica	Lobelioideae	Lobelieae	Siphocampylinae	Schizosiphon	Delostemon	America
Lobelia arnhemiaca	Lobelioideae	Lobelieae	Siphocampylinae	Schizosiphon	Hypsela	Australasia
Lobelia assurgens	Lobelioideae	Lobelieae	Siphocampylinae	Schizosiphon	Tylomium	America
Lobelia bambuseti	Lobelioideae	Lobelieae	Siphocampylinae	Schizosiphon	Rhynchopetalum	Africa
Lobelia baumannii	Lobelioideae	Lobelieae	Siphocampylinae	Schizosiphon	Delostemon	Africa
Lobelia bequaertii	Lobelioideae	Lobelieae	Siphocampylinae	Schizosiphon	Rhynchopetalum	Africa
Lobelia boninensis	Lobelioideae	Lobelieae	Siphocampylinae	Schizosiphon	Rhynchopetalum	Asia
Lobelia bridgesii	Lobelioideae	Lobelieae	Siphocampylinae	Schizosiphon	Tupa	America
Lobelia burttii subsp burttii	Lobelioideae	Lobelieae	Siphocampylinae	Schizosiphon	Rhynchopetalum	Africa
Lobelia burttii subsp meruensis	Lobelioideae	Lobelieae	Siphocampylinae	Schizosiphon	Rhynchopetalum	Africa
Lobelia burttii subsp telmaticola	Lobelioideae	Lobelieae	Siphocampylinae	Schizosiphon	Rhynchopetalum	Africa
Lobelia capillifolia	Lobelioideae	Lobelieae	Siphocampylinae	Schizosiphon	Delostemon	Africa
Lobelia cardinalis	Lobelioideae	Lobelieae	Siphocampylinae	Schizosiphon	Lobelia	America
Lobelia carens	Lobelioideae	Lobelieae	Siphocampylinae	Schizosiphon	Hypsela	Australasia
Lobelia chinensis	Lobelioideae	Lobelieae	Siphocampylinae	Schizosiphon	Hypsela	Asia
Lobelia clavata	Lobelioideae	Lobelieae	Siphocampylinae	Schizosiphon	Rhynchopetalum	Asia
Lobelia columnaris	Lobelioideae	Lobelieae	Siphocampylinae	Schizosiphon	Rhynchopetalum	Africa
Lobelia coronopifolia	Lobelioideae	Lobelieae	Siphocampylinae	Schizosiphon	Delostemon	Africa
Lobelia davidii	Lobelioideae	Lobelieae	Siphocampylinae	Schizosiphon	Rhynchopetalum	Asia
Lobelia deckenii subsp deckenii	Lobelioideae	Lobelieae	Siphocampylinae	Schizosiphon	Rhynchopetalum	Africa
Lobelia deckenii subsp incipiens	Lobelioideae	Lobelieae	Siphocampylinae	Schizosiphon	Rhynchopetalum	Africa
Lobelia deckenii	Lobelioideae	Lobelieae	Siphocampylinae	Schizosiphon	Rhynchopetalum	Africa
Lobelia doniana	Lobelioideae	Lobelieae	Siphocampylinae	Schizosiphon	Rhynchopetalum	Asia
Lobelia dortmanna	Lobelioideae	Lobelieae	Siphocampylinae	Schizosiphon	Lobelia	America
Lobelia erectiuscula	Lobelioideae	Lobelieae	Siphocampylinae	Schizosiphon	Rhynchopetalum	Asia
Lobelia erinus	Lobelioideae	Lobelieae	Siphocampylinae	Schizosiphon	Stenotium	Africa
Lobelia exaltata	Lobelioideae	Lobelieae	Siphocampylinae	Schizosiphon	Rhynchopetalum	America
Lobelia excelsa	Lobelioideae	Lobelieae	Siphocampylinae	Schizosiphon	Tupa	America
Lobelia fatiscens	Lobelioideae	Lobelieae	Siphocampylinae	Schizosiphon	Hypsela	Australasia
Lobelia feayana	Lobelioideae	Lobelieae	Siphocampylinae	Schizosiphon	Lobelia	America
Lobelia fervens subsp fervens	Lobelioideae	Lobelieae	Siphocampylinae	Schizosiphon	Stenotium	Africa
Lobelia fistulosa	Lobelioideae	Lobelieae	Siphocampylinae	Schizosiphon	Rhynchopetalum	America
Lobelia fugax	Lobelioideae	Lobelieae	Siphocampylinae	Schizosiphon	Hypsela	Australasia
Lobelia galpinii	Lobelioideae	Lobelieae	Siphocampylinae	Schizosiphon	Stenotium	Africa
Lobelia gibberoa	Lobelioideae	Lobelieae	Siphocampylinae	Schizosiphon	Rhynchopetalum	Africa
Lobelia glaberrima	Lobelioideae	Lobelieae	Siphocampylinae	Schizosiphon	Hypsela	Australasia
Lobelia glandulosa	Lobelioideae	Lobelieae	Siphocampylinae	Schizosiphon	Lobelia	America
Lobelia graniticola	Lobelioideae	Lobelieae	Siphocampylinae	Schizosiphon	Stenotium	Africa
Lobelia gregoriana subsp elgonensis	Lobelioideae	Lobelieae	Siphocampylinae	Schizosiphon	Rhynchopetalum	Africa
Lobelia gregoriana subsp gregoriana	Lobelioideae	Lobelieae	Siphocampylinae	Schizosiphon	Rhynchopetalum	Africa
Lobelia gregoriana subsp sattimae	Lobelioideae	Lobelieae	Siphocampylinae	Schizosiphon	Rhynchopetalum	Africa
Lobelia hartlaubii	Lobelioideae	Lobelieae	Siphocampylinae	Schizosiphon	Delostemon	Africa
Lobelia heterophylla subsp heterophylla	Lobelioideae	Lobelieae	Siphocampylinae	Schizosiphon	Holopogon	Australasia
Lobelia holstii	Lobelioideae	Lobelieae	Siphocampylinae	Schizosiphon	Delostemon	Africa
Lobelia hypoleuca	Lobelioideae	Lobelieae	Siphocampylinae	Schizosiphon	Revolutella	Pacific islands
Lobelia inflata	Lobelioideae	Lobelieae	Siphocampylinae	Schizosiphon	Lobelia	America
Lobelia ionantha	Lobelioideae	Lobelieae	Siphocampylinae	Schizosiphon	Hypsela	Australasia
Lobelia irasuensis	Lobelioideae	Lobelieae	Siphocampylinae	Schizosiphon	Cryptostemon	America
Lobelia iteophylla	Lobelioideae	Lobelieae	Siphocampylinae	Schizosiphon	Rhynchopetalum	Asia
Lobelia jasionoides	Lobelioideae	Lobelieae	Siphocampylinae	Schizosiphon	Jasionopsis	Africa
Lobelia kalmii	Lobelioideae	Lobelieae	Siphocampylinae	Schizosiphon	Lobelia	America
Lobelia kauaensis	Lobelioideae	Lobelieae	Siphocampylinae	Schizosiphon	n/a	Pacific islands
Lobelia kraussi	Lobelioideae	Lobelieae	Siphocampylinae	Schizosiphon	Tylomium	America
Lobelia laxa	Lobelioideae	Lobelieae	Siphocampylinae	Schizosiphon	Stenotium	Africa
Lobelia laxiflora	Lobelioideae	Lobelieae	Siphocampylinae	Schizosiphon	Homochilus	America
Lobelia leschenaultiana	Lobelioideae	Lobelieae	Siphocampylinae	Schizosiphon	Rhynchopetalum	Asia
Lobelia linearis	Lobelioideae	Lobelieae	Siphocampylinae	Schizosiphon	Delostemon	Africa
Lobelia linnaeoides	Lobelioideae	Lobelieae	Siphocampylinae	Schizosiphon	Hypsela	Australasia
Lobelia longisepala	Lobelioideae	Lobelieae	Siphocampylinae	Schizosiphon	Rhynchopetalum	Africa
Lobelia loochooensis	Lobelioideae	Lobelieae	Siphocampylinae	Schizosiphon	Hypsela	Asia
Lobelia lukwangulensis	Lobelioideae	Lobelieae	Siphocampylinae	Schizosiphon	Rhynchopetalum	Africa
Lobelia macrodon	Lobelioideae	Lobelieae	Siphocampylinae	Schizosiphon	Hypsela	Australasia
Lobelia malowensis	Lobelioideae	Lobelieae	Siphocampylinae	Schizosiphon	Delostemon	Africa
Lobelia martagon	Lobelioideae	Lobelieae	Siphocampylinae	Schizosiphon	Tylomium	America
Lobelia melliana	Lobelioideae	Lobelieae	Siphocampylinae	Schizosiphon	Rhynchopetalum	Asia
Lobelia mildbraedii	Lobelioideae	Lobelieae	Siphocampylinae	Schizosiphon	Rhynchopetalum	Africa
Lobelia morogoroensis	Lobelioideae	Lobelieae	Siphocampylinae	Schizosiphon	Rhynchopetalum	Africa
Lobelia muscoides	Lobelioideae	Lobelieae	Siphocampylinae	Schizosiphon	Stenotium	Africa
Lobelia nana	Lobelioideae	Lobelieae	Siphocampylinae	Schizosiphon	Stenotium	America
Lobelia neglecta	Lobelioideae	Lobelieae	Siphocampylinae	Schizosiphon	Delostemon	Africa
Lobelia nicotianifolia	Lobelioideae	Lobelieae	Siphocampylinae	Schizosiphon	Rhynchopetalum	Asia
Lobelia niihauensis	Lobelioideae	Lobelieae	Siphocampylinae	Schizosiphon	Revolutella	Pacific islands
Lobelia nubigena	Lobelioideae	Lobelieae	Siphocampylinae	Schizosiphon	Rhynchopetalum	Asia
Lobelia oligophylla	Lobelioideae	Lobelieae	Siphocampylinae	Schizosiphon	Hypsela	America
Lobelia organensis	Lobelioideae	Lobelieae	Siphocampylinae	Schizosiphon	Rhynchopetalum	America
Lobelia paludosa	Lobelioideae	Lobelieae	Siphocampylinae	Schizosiphon	Lobelia	America
Lobelia patula	Lobelioideae	Lobelieae	Siphocampylinae	Schizosiphon	Delostemon	Africa
Lobelia petiolata	Lobelioideae	Lobelieae	Siphocampylinae	Schizosiphon	Rhynchopetalum	Africa
Lobelia physaloides	Lobelioideae	Lobelieae	Siphocampylinae	Schizosiphon	Colensoa	Australasia
Lobelia pleotricha	Lobelioideae	Lobelieae	Siphocampylinae	Schizosiphon	Rhynchopetalum	Asia
Lobelia polyphylla	Lobelioideae	Lobelieae	Siphocampylinae	Schizosiphon	Tupa	America
Lobelia portoricensis	Lobelioideae	Lobelieae	Siphocampylinae	Schizosiphon	Tylomium	America
Lobelia proctorii	Lobelioideae	Lobelieae	Siphocampylinae	Schizosiphon	Rhynchopetalum	Asia
Lobelia puberula	Lobelioideae	Lobelieae	Siphocampylinae	Schizosiphon	Lobelia	America
Lobelia rhynchopetalum	Lobelioideae	Lobelieae	Siphocampylinae	Schizosiphon	Rhynchopetalum	Africa
Lobelia ritabeaniana	Lobelioideae	Lobelieae	Siphocampylinae	Schizosiphon	Rhynchopetalum	Africa
Lobelia roughii	Lobelioideae	Lobelieae	Siphocampylinae	Schizosiphon	Hypsela	Australasia
Lobelia sancta	Lobelioideae	Lobelieae	Siphocampylinae	Schizosiphon	Rhynchopetalum	Africa
Lobelia seguinii	Lobelioideae	Lobelieae	Siphocampylinae	Schizosiphon	Rhynchopetalum	Asia
Lobelia sessilifolia	Lobelioideae	Lobelieae	Siphocampylinae	Schizosiphon	Rhynchopetalum	Asia
Lobelia siphilitica var siphilitica	Lobelioideae	Lobelieae	Siphocampylinae	Schizosiphon	Lobelia	America
Lobelia siphilitica	Lobelioideae	Lobelieae	Siphocampylinae	Schizosiphon	Lobelia	America
Lobelia sonderiana	Lobelioideae	Lobelieae	Siphocampylinae	Schizosiphon	Mezleriopsis	Africa
Lobelia sp.	Lobelioideae	Lobelieae	Siphocampylinae	Schizosiphon	n/a	Africa
Lobelia spicata	Lobelioideae	Lobelieae	Siphocampylinae	Schizosiphon	Lobelia	America
Lobelia stricklandiae	Lobelioideae	Lobelieae	Siphocampylinae	Schizosiphon	Rhynchopetalum	Africa
Lobelia stricta	Lobelioideae	Lobelieae	Siphocampylinae	Schizosiphon	Tylomium	America
Lobelia stuhlmannii	Lobelioideae	Lobelieae	Siphocampylinae	Schizosiphon	Rhynchopetalum	Africa
Lobelia taliensis	Lobelioideae	Lobelieae	Siphocampylinae	Schizosiphon	n/a	Asia
Lobelia telekii	Lobelioideae	Lobelieae	Siphocampylinae	Schizosiphon	Rhynchopetalum	Africa
Lobelia thapsoidea	Lobelioideae	Lobelieae	Siphocampylinae	Schizosiphon	Rhynchopetalum	America
Lobelia thermalis	Lobelioideae	Lobelieae	Siphocampylinae	Schizosiphon	Delostemon	Africa
Lobelia thuliniana	Lobelioideae	Lobelieae	Siphocampylinae	Schizosiphon	Rhynchopetalum	Africa
Lobelia tomentosa	Lobelioideae	Lobelieae	Siphocampylinae	Schizosiphon	Delostemon	Africa
Lobelia tupa	Lobelioideae	Lobelieae	Siphocampylinae	Schizosiphon	Tupa	America
Lobelia udzungwensis	Lobelioideae	Lobelieae	Siphocampylinae	Schizosiphon	Rhynchopetalum	Africa
Lobelia urens	Lobelioideae	Lobelieae	Siphocampylinae	Schizosiphon	Stenotium	Mediterranean
Lobelia vivaldii	Lobelioideae	Lobelieae	Siphocampylinae	Schizosiphon	Tylomium	America
Lobelia wollastonii	Lobelioideae	Lobelieae	Siphocampylinae	Schizosiphon	Rhynchopetalum	Africa
Lobelia xalapensis	Lobelioideae	Lobelieae	Siphocampylinae	Schizosiphon	Stenotium	America
Lobelia yuccoides	Lobelioideae	Lobelieae	Siphocampylinae	Schizosiphon	Revolutella	Pacific islands
Lobelia zeylanica	Lobelioideae	Lobelieae	Siphocampylinae	Schizosiphon	Delostemon	Asia
Lysipomia cuspidata	Lobelioideae	Lobelieae	Lysipomiinae	n/a	n/a	America
Lysipomia pumila	Lobelioideae	Lobelieae	Lysipomiinae	n/a	n/a	America
Lysipomia sphagnophila	Lobelioideae	Lobelieae	Lysipomiinae	n/a	n/a	America
Monopsis alba	Lobelioideae	Lobelieae	Siphocampylinae	Schizosiphon	n/a	Africa
Monopsis debilis	Lobelioideae	Lobelieae	Siphocampylinae	Schizosiphon	n/a	Africa
Monopsis debilis var debilis	Lobelioideae	Lobelieae	Siphocampylinae	Schizosiphon	n/a	Africa
Monopsis flava	Lobelioideae	Lobelieae	Siphocampylinae	Schizosiphon	n/a	Africa
Monopsis stellarioides subsp schimperiana	Lobelioideae	Lobelieae	n/a	n/a	n/a	Africa
Palmerella debilis subsp serrata	Lobelioideae	n/a	n/a	n/a	n/a	America
Porterella carnosula	Lobelioideae	n/a	n/a	n/a	n/a	America
Pratia angulata	Lobelioideae	Delisseeae	Burmeisterinae	n/a	n/a	Australasia
Pratia borneensis	Lobelioideae	Delisseeae	Burmeisterinae	n/a	n/a	Australasia
Pratia nummularia	Lobelioideae	Delisseeae	Burmeisterinae	n/a	n/a	Australasia
Pratia purpurascens	Lobelioideae	Delisseeae	Burmeisterinae	n/a	n/a	Australasia
Sclerotheca arborea	Lobelioideae	Lobelieae	Sclerothecinae	n/a	n/a	Pacific islands
Sclerotheca forsteri	Lobelioideae	Lobelieae	Sclerothecinae	n/a	n/a	Pacific islands
Sclerotheca longistigmata	Lobelioideae	Lobelieae	Sclerothecinae	n/a	n/a	Pacific islands
Sclerotheca magdalenae	Lobelioideae	Lobelieae	Sclerothecinae	n/a	n/a	Pacific islands
Sclerotheca margareta	Lobelioideae	Lobelieae	Sclerothecinae	n/a	n/a	Pacific islands
Sclerotheca oreades	Lobelioideae	Lobelieae	Sclerothecinae	n/a	n/a	Pacific islands
Sclerotheca sp.	Lobelioideae	Lobelieae	Sclerothecinae	n/a	n/a	Pacific islands
Sclerotheca viridiflora	Lobelioideae	Lobelieae	Sclerothecinae	n/a	n/a	Pacific islands
Siphocampylus affinis	Lobelioideae	Lobelieae	Siphocampylinae	Eusiphon	n/a	America
Siphocampylus andinus	Lobelioideae	Lobelieae	Siphocampylinae	Eusiphon	n/a	America
Siphocampylus angustiflorus	Lobelioideae	Lobelieae	Siphocampylinae	Eusiphon	n/a	America
Siphocampylus aureus	Lobelioideae	Lobelieae	Siphocampylinae	Eusiphon	n/a	America
Siphocampylus betulifolius	Lobelioideae	Lobelieae	Siphocampylinae	Eusiphon	n/a	America
Siphocampylus bilabiatus	Lobelioideae	Lobelieae	Siphocampylinae	Eusiphon	n/a	America
Siphocampylus brevicalyx	Lobelioideae	Lobelieae	Siphocampylinae	Eusiphon	n/a	America
Siphocampylus citrinus	Lobelioideae	Lobelieae	Siphocampylinae	Eusiphon	n/a	America
Siphocampylus clotho	Lobelioideae	Lobelieae	Siphocampylinae	Eusiphon	n/a	America
Siphocampylus corymbifer	Lobelioideae	Lobelieae	Siphocampylinae	Eusiphon	n/a	America
Siphocampylus ecuadorensis	Lobelioideae	Lobelieae	Siphocampylinae	Eusiphon	n/a	America
Siphocampylus elfriedii	Lobelioideae	Lobelieae	Siphocampylinae	Eusiphon	n/a	America
Siphocampylus flagelliformis	Lobelioideae	Lobelieae	Siphocampylinae	Eusiphon	n/a	America
Siphocampylus fulgens	Lobelioideae	Lobelieae	Siphocampylinae	Eusiphon	n/a	America
Siphocampylus giganteus	Lobelioideae	Lobelieae	Siphocampylinae	Eusiphon	n/a	America
Siphocampylus jelskii	Lobelioideae	Lobelieae	Siphocampylinae	Eusiphon	n/a	America
Siphocampylus krauseanus	Lobelioideae	Lobelieae	Siphocampylinae	Eusiphon	n/a	America
Siphocampylus lycioides	Lobelioideae	Lobelieae	Siphocampylinae	Eusiphon	n/a	America
Siphocampylus macropodus	Lobelioideae	Lobelieae	Siphocampylinae	Eusiphon	n/a	America
Siphocampylus manettiiflorus	Lobelioideae	Lobelieae	Siphocampylinae	Eusiphon	n/a	America
Siphocampylus matthiaei	Lobelioideae	Lobelieae	Siphocampylinae	Eusiphon	n/a	America
Siphocampylus rosmarinifolius	Lobelioideae	Lobelieae	Siphocampylinae	Eusiphon	n/a	America
Siphocampylus rusbyanus	Lobelioideae	Lobelieae	Siphocampylinae	Eusiphon	n/a	America
Siphocampylus scandens	Lobelioideae	Lobelieae	Siphocampylinae	Eusiphon	n/a	America
Siphocampylus smilax	Lobelioideae	Lobelieae	Siphocampylinae	Eusiphon	n/a	America
Siphocampylus sparsipilus	Lobelioideae	Lobelieae	Siphocampylinae	Eusiphon	n/a	America
Siphocampylus tunarensis	Lobelioideae	Lobelieae	Siphocampylinae	Eusiphon	n/a	America
Siphocampylus tunicatus	Lobelioideae	Lobelieae	Siphocampylinae	Eusiphon	n/a	America
Siphocampylus tupaeformis	Lobelioideae	Lobelieae	Siphocampylinae	Eusiphon	n/a	America
Siphocampylus vatkeanus	Lobelioideae	Lobelieae	Siphocampylinae	Eusiphon	n/a	America
Siphocampylus veteranus	Lobelioideae	Lobelieae	Siphocampylinae	Eusiphon	n/a	America
Siphocampylus virgatus	Lobelioideae	Lobelieae	Siphocampylinae	Eusiphon	n/a	America
Solenopsis antiphonitis	Lobelioideae	Lobelieae	Siphocampylinae	Eusiphon	n/a	Mediterranean
Solenopsis bivonae	Lobelioideae	Lobelieae	Siphocampylinae	Eusiphon	n/a	Mediterranean
Solenopsis laurentia	Lobelioideae	Lobelieae	Siphocampylinae	Eusiphon	n/a	Mediterranean
Solenopsis minuta	Lobelioideae	Lobelieae	Siphocampylinae	Eusiphon	n/a	Mediterranean
Trematolobelia kauaiensis	Lobelioideae	Lobelieae	Sclerothecinae	Multiporosae	n/a	Pacific islands
Trematolobelia macrostachys	Lobelioideae	Lobelieae	Sclerothecinae	Multiporosae	n/a	Pacific islands
Wimmerella hederacea	Lobelioideae	n/a	n/a	n/a	n/a	Africa
Wimmerella pygmaea	Lobelioideae	n/a	n/a	n/a	n/a	Africa

## Sheet: Sheet 3
References for the sequences used in this study.
Alarcón M, Roquet C, García-Fernández A, Vargas P, Aldasoro JJ (2013) Phylogenetic and phylogeographic evidence for a Pleistocene disjunction between Campanula jacobaea (Cape Verde Islands) and C. balfourii (Socotra). Molecular Phylogenetics and Evolution 69(3): 828–836.
Albach DC, Soltis PS, Soltis DE, Olmstead RG (2001) Phylogenetic analysis of asterids based on sequences of four genes. Annals of the Missouri Botanical Garden 163–212.
Albrecht D, Walsh NG, Jobson RW, Knox EB (2015) The taxonomic status of Hypsela sessiliflora E. Wimm.(Campanulaceae). Telopea 18: 455–462.
Aleksić JM, Škondrić S, Lakušić D (2018) Comparative phylogeography of capitulate Campanula species from the Balkans, with description of a new species, C. daucoides. Plant Systematics and Evolution 304(4): 549–575.
Antonelli A (2008) Higher level phylogeny and evolutionary trends in Campanulaceae subfam. Lobelioideae: Molecular signal overshadows morphology. Molecular phylogenetics and evolution 46(1): 1–18.
Antonelli A (2009) Have giant lobelias evolved several times independently? Life form shifts and historical biogeography of the cosmopolitan and highly diverse subfamily Lobelioideae (Campanulaceae). BMC biology 7(1): 82.
Aust SK, Ahrendsen DL, Kellar PR (2015) Biodiversity assessment among two Nebraska prairies: a comparison between traditional and phylogenetic diversity indices. Biodiversity data journal (3).
Barnard‐Kubow KB, Debban CL, Galloway LF (2015) Multiple glacial refugia lead to genetic structuring and the potential for reproductive isolation in a herbaceous plant. American Journal of Botany 102(11): 1842–1853.
Bogdanović S, Brullo S, Rešetnik I, Lakušić D, Satovic Z, Liber Z (2014) Campanula skanderbegii: molecular and morphological evidence of a new Campanula species (Campanulaceae) endemic to Albania. Systematic botany 39(4): 1250–1260.
Borsch T, Korotkova N, Raus T, Lobin W, Löhne C (2009) The petD group II intron as a species level marker: utility for tree inference and species identification in the diverse genus Campanula (Campanulaceae). Willdenowia 7–33.
Bremer B, Bremer K, Heidari N, Erixon P, Olmstead RG., Anderberg AA, Källersjö M, Barkhordarian E (2002) Phylogenetics of asterids based on 3 coding and 3 non-coding chloroplast DNA markers and the utility of non-coding DNA at higher taxonomic levels. Molecular phylogenetics and evolution 24(2): pp.274–301.
Bremer K, Gustafsson MH (1997) East Gondwana ancestry of the sunflower alliance of families. Proceedings of the National Academy of Sciences 94(17): 9188–9190.
Bruni I, De Mattia F, Martellos S, Galimberti A, Savadori P, Casiraghi M, Nimis PL, Labra M (2012) DNA barcoding as an effective tool in improving a digital plant identification system: a case study for the area of Mt. Valerio, Trieste (NE Italy). PloS one 7(9)
Cano-Maqueda J, Talavera S (2011) A taxonomic revision of the Campanula lusitanica complex (Campanulaceae) in the Western Mediterranean region. In Anales del Jardín Botánico de Madrid 68(1): 15–47.
Cano-Maqueda J, Talavera S, Arista M, Catalán P (2008) Speciation and biogeographical history of the Campanula lusitanica complex (Campanulaceae) in the Western Mediterranean region. Taxon 57(4): 1252–2E.
CBOL Plant Working Group, Janzen DH (2009) A DNA barcode for land plants. Proceedings of the National Academy of Sciences of the United States of America 12794–12797.
Chen LY, Wang QF, Renner SS (2016) East Asian Lobelioideae and ancient divergence of a giant rosette Lobelia in Himalayan Bhutan. Taxon 65(2): 293–304.
Chen S, Yao H, Han J, Liu C, Song J, Shi L, Zhu Y, Ma X, Gao T, Pang X, Luo K (2010) Validation of the ITS2 region as a novel DNA barcode for identifying medicinal plant species. PloS one 5(1).
Chen SL, Han JP (2009) Identification of medicinal plants using DNA barcoding technique.
Cheon KS, Kim KA, Yoo KO (2017) The complete chloroplast genome sequences of three Adenophora species and comparative analysis with Campanuloid species (Campanulaceae). Plos one 12(8): e0183652.
Cheon KS, Kim KA, Jang SK, Yoo KO (2016) Complete chloroplast genome sequence of Campanula takesimana (Campanulaceae), an endemic to Korea. Mitochondrial DNA Part A 27(3): 2169–2171.
Cheon KS, Kim KA, Yoo KO (2017) The complete chloroplast genome sequences of three Adenophora species and comparative analysis with Campanuloid species (Campanulaceae). Plos one 12(8).
Cosner ME, Raubeson LA, Jansen RK (2004) Chloroplast DNA rearrangements in Campanulaceae: phylogenetic utility of highly rearranged genomes. BMC evolutionary biology 4(1): 27.
Crowl AA, Mavrodiev E, Mansion G, Haberle R, Pistarino A, Kamari G, Phitos D, Borsch T, Cellinese N (2014) Phylogeny of Campanuloideae (Campanulaceae) with emphasis on the utility of nuclear pentatricopeptide repeat (PPR) genes. PLOS one 9(4)
Crowl AA, Visger CJ, Mansion G, Hand R, Wu HH, Kamari G, Cellinese N (2015) Evolution and biogeography of the endemic Roucela complex (Campanulaceae: Campanula) in the Eastern Mediterranean. Ecology and evolution 5(22): 5329–5343.
Cupido CN, Prebble JM, Eddie WM (2013) Phylogeny of Southern African and Australasian Wahlenbergioids (Campanulaceae) based on ITS and trnL-F sequence data: implications for a reclassification. Systematic Botany 38(2): 523–535.
de Vere N, Rich TC, Ford CR, Trinder SA, Long C, Moore CW, Satterthwaite D, Davies H, Allainguillaume J, Ronca S, Tatarinova T (2012) DNA barcoding the native flowering plants and conifers of Wales. PloS one 7(6)
Daru BH, Van der Bank M, Maurin O, Yessoufou K, Schaefer H, Slingsby JA, Davies TJ (2016) A novel phylogenetic regionalization of phytogeographical zones of southern Africa reveals their hidden evolutionary affinities. Journal of Biogeography 43(1): 155–166.
Donoghue MJ, Olmstead RG, Smith JF, Palmer JD (1992) Phylogenetic relationships of Dipsacales based on rbcL sequences. Annals of the Missouri Botanical Garden 333–345.
Dotti KRD (1998) Lysipomia: the evolutionary history of a paramo endemic. PhD Thesis. Northern Arizona University.
Erickson D, Kuzmina M, Kress J, McShea W (2015) Forensic analysis of white tailed deer diet.
Fenneman E, Graham S (2016) DNA Barcoding the Vascular Plant Flora of Southern British Columbia. Figshare.
Forest F, Grenyer R, Rouget M, Davies TJ, Cowling RM, Faith DP, Balmford A, Manning JC, Procheş Ş, van der Bank M, Reeves G (2007) Preserving the evolutionary potential of floras in biodiversity hotspots. Nature 445(7129): 757–760.
Frajman B, Schneeweiss GM (2009) A campanulaceous fate: the Albanian stenoendemic Asyneuma comosiforme in fact belongs to isophyllous Campanula. Systematic Botany 34(3): 595–601.
Fu RZ, Wang J, Zhang YB, Wang ZT, But PPH, Li N, Shaw PC (1999) Differentiation of medicinal Codonopsis species from adulterants by polymerase chain reaction-restriction fragment length polymorphism. Planta medica 65(07): 648–650.
Galimberti A, De Mattia F, Bruni I, Scaccabarozzi D, Sandionigi A, Barbuto M, Casiraghi M, Labra M (2014) A DNA barcoding approach to characterize pollen collected by honeybees. PLoS One 9(10).
García‐Aloy S, Vitales D, Roquet C, Sanmartín I, Vargas P, Molero J, Alarcón M (2017) North‐west Africa as a source and refuge area of plant biodiversity: A case study on Campanula kremeri and Campanula occidentalis. Journal of Biogeography 44(9): 2057–2068.
Geleta M, Bryngelsson T (2012) Population genetic analysis of Lobelia rhynchopetalum Hemsl.(Campanulaceae) using DNA sequences from ITS and eight chloroplast DNA regions. The Scientific World Journal 2012.
Givnish TJ (2000) Adaptive radiation, dispersal, and diversification of the Hawaiian lobeliads. In: The biology of biodiversity. Springer, Tokyo, 67–90.
Givnish TJ, Bean GJ, Ames M, Lyon SP, Sytsma KJ (2013) Phylogeny, floral evolution, and inter-island dispersal in Hawaiian Clermontia (Campanulaceae) based on ISSR variation and plastid spacer sequences. PLoS One 8(5)
Givnish TJ, Millam KC, Mast AR, Paterson TB, Theim TJ, Hipp AL, Sytsma KJ (2009) Origin, adaptive radiation and diversification of the Hawaiian lobeliads (Asterales: Campanulaceae). Proceedings of the Royal Society B: Biological Sciences 276(1656): 407–416.
Group CPB, Li DZ, Gao LM, Li HT, Wang H, Ge XJ, Yang JB (2011) Comparative analysis of a large dataset indicates that internal transcribed spacer (ITS) should be incorporated into the core barcode for seed plants. Proceedings of the National Academy of Sciences 108(49): 19641–19646.
Gustafsson MH, Backlund A, Bremer B (1996) Phylogeny of the Asterales sensu lato based on rbcL sequences with particular reference to the Goodeniaceae. Plant Systematics and Evolution 199(3–4): 217–242.
Gustafsson MH, Bremer K (1997) The circumscription and systematic position of Carpodetaceae. Australian Systematic Botany, 10(6), 855–862.
Haberle RC, Dang A, Lee T, Peñaflor C, Cortes-Burns H, Oestreich A, Eddie WM (2009) Taxonomic and biogeographic implications of a phylogenetic analysis of the Campanulaceae based on three chloroplast genes. Taxon 58(3): 715–734.
Haberle RC, Fourcade HM, Boore JL, Jansen RK (2008) Extensive rearrangements in the chloroplast genome of Trachelium caeruleum are associated with repeats and tRNA genes. Journal of Molecular Evolution 66(4): 350–361.
He JY, Zhu S, Komatsu K, Goda Y, Cai SQ (2014) Genetic polymorphism of medicinally-used Codonopsis species in an internal transcribed spacer sequence of nuclear ribosomal DNA and its application to authenticate Codonopsis Radix. Journal of natural medicines 68(1): 112–124.
Heenan PB, Mitchell AD, De Lange PJ, Keeling J, Paterson AM (2010) Late-Cenozoic origin and diversification of Chatham Islands endemic plant species revealed by analyses of DNA sequence data. New Zealand Journal of Botany, 48(2): 83–136.
Hilu KW, Borsch T, Müller K, Soltis DE, Soltis PS, Savolainen V, Chase MW, Powell MP, Alice LA, Evans R, Sauquet H (2003) Angiosperm phylogeny based on< 011> matK sequence information. American journal of botany 90(12): 1758–1776.
Holstein N, Renner SS (2011) A dated phylogeny and collection records reveal repeated biome shifts in the African genus Coccinia (Cucurbitaceae). BMC evolutionary biology 11(1): 28.
Jantzen JR, Whitten WM, Neubig KM, Majure LC, Soltis DE, Soltis PS (2019) Effects of taxon sampling and tree reconstruction methods on phylodiversity metrics. Ecology and evolution 9(17): 9479–9499.
Jones KE, Korotkova N, Petersen J, Henning T, Borsch T, Kilian N (2017) Dynamic diversification history with rate upshifts in Holarctic bell‐flowers (Campanula and allies). Cladistics 33(6): 637–666.
Kajtoch Ł, Kubisz D, Heise W, Mazur MA, Babik W (2015) Plant–herbivorous beetle networks: molecular characterization of trophic ecology within a threatened steppic environment. Molecular ecology 24(15): 4023–4038.
Karehed J, Lundberg J, Bremer B, Bremer K (1999) Evolution of the Australasian families Alseuosmiaceae, Argophyllaceae, and Phellinaceae. Systematic Botany 660–682.
Kim KA, Yoo KO (2011) Phylogenetic relationships of Korean Campanulaceae based on PCR-RFLP and ITS sequences. Korean Journal of Plant Taxonomy 41(2): 119–129.
Kim KA, Yoo KO (2012) Phylogenetic relationships of Korean Campanulaceae based on chloroplast DNA sequences. Korean Journal of Plant Taxonomy 42(4): 282–293.
Kim HJ, Son DC, Kim HJ, Choi KOhSH, Kang SH (2017) The chemotaxonomic classification of Korean Campanulaceae based on triterpene sterol and polyacetylene contents. Biochemical Systematics and Ecology 74: 11–18.
Kim KJ, Jansen RK (1995) ndhF sequence evolution and the major clades in the sunflower family. Proceedings of the National Academy of Sciences 92(22): 10379–10383.
Kim OT, Bang KH, In DS, Lee JW, Kim YC, Shin YS, Hyun DY, Lee SS, Cha SW, Seong NS (2007) Molecular authentication of ginseng cultivars by comparison of internal transcribed spacer and 5.8 S rDNA sequences. Plant Biotechnology Reports 1(3): 163–167.
Kim YD, Lee J, Sun Y, Lee S, Kim SH, Jansen RK (1999) Molecular evidence for the phylogenetic position of Hanabusaya asiatica Nakai (Campanulaceae), an endemic species in Korea. Journal of Plant Biology 42(2): 168–173.
Knox EB (2014) The dynamic history of plastid genomes in the Campanulaceae sensu lato is unique among angiosperms. Proceedings of the National Academy of Sciences 111(30): 11097–11102.
Knox EB, Li C (2017) The East Asian origin of the giant lobelias. American Journal of Botany 104(6): 924–938.
Knox EB, Heenan PB, Muasya AM, Murray BG (2008) Phylogenetic position and relationships of Lobelia glaberrima (Lobeliaceae) a new alpine species from southern South Island (New Zealand). New Zealand journal of botany 46(1): 77–85.
Knox EB, Muasya AM, Muchhala N (2008) The predominantly South American clade of Lobeliaceae. Systematic Botany 33(2): 462–468.
Kokubugata G, Nakamura K, Forster PI, Hirayama Y, Yokota M (2012) Antitropical distribution of Lobelia species (Campanulaceae) between the Ryukyu Archipelago of Japan and Oceania as indicated by molecular data. Australian Journal of Botany 60(5): 417–428.
Koopman MM, Ayers TJ (2005) Nectar spur evolution in the Mexican lobelias (Campanulaceae: Lobelioideae). American Journal of Botany 92(3): 558–562.
Kuzmina ML, Braukmann TW, Fazekas AJ, Graham SW, Dewaard SL, Rodrigues A, Newmaster SG (2017) Using herbarium‐derived DNAs to assemble a large‐scale DNA barcode library for the vascular plants of Canada. Applications in Plant Sciences 5(12): 1700079.
Lagomarsino LP, Antonelli A, Muchhala N, Timmermann A, Mathews S, Davis CC (2014) Phylogeny, classification, and fruit evolution of the species‐rich Neotropical bellflowers (Campanulaceae: Lobelioideae). American Journal of Botany 101(12): 2097–2112.
Lagomarsino LP, Condamine FL, Antonelli A, Mulch A, Davis CC (2016) The abiotic and biotic drivers of rapid diversification in Andean bellflowers (Campanulaceae). New Phytologist 210(4): 1430–1442.
Lakušić D, Liber Z, Nikolić T, Surina B, Kovačić S, Bogdanović S, Stefanović S (2013) Molecular phylogeny of the Campanula pyramidalis species complex (Campanulaceae) inferred from chloroplast and nuclear non‐coding sequences and its taxonomic implications. Taxon 62(3): 505–524.
Lee HO, Choi JW, Baek JH, Oh JH, Lee SC, Kim CK (2018) Assembly of the mitochondrial genome in the campanulaceae family using Illumina low-coverage sequencing. Genes 9(8): 383.
Lee J, Kim SY, Lim JS, Sook Chun H, Kwon K, Koh Y, Nah G (2018) The complete chloroplast genome of Codonopsis lanceolata (Campanulaceae). Mitochondrial DNA Part B 3(2): 1075–1076.
Lemoine NP, Shue J, Verrico B, Erickson D, Kress WJ, Parker JD (2015) No difference in assembly mechanisms for native and introduced species.
Lin T, Hsieh C, Agrawal DC, Kuo C, Chueh F, Tsay H (2007) ITS sequence based phylogenetic relationship of Dangshen radix. Journal of Food and Drug Analysis 15(4): 428.
Little DP (2014). A DNA mini‐barcode for land plants. Molecular Ecology Resources 14(3): 437–446.
Liu J, Shi L, Song J, Sun W, Han J, Liu X, Hou D, Yao H, Li M, Chen S (2017) BOKP: a DNA barcode reference library for monitoring herbal drugs in the Korean pharmacopeia. Frontiers in pharmacology 8: 931.
Lundberg J (2001) The asteralean affinity of the Mauritian Roussea (Rousseaceae). Botanical Journal of the Linnean Society 137(3): 267–276.
Lundberg J, Bremer K (2003) A phylogenetic study of the order Asterales using one morphological and three molecular data sets. International Journal of Plant Sciences 164(4): 553–578.
Mairal M, Caujapé-Castells J, Pellissier L, Jaén-Molina R, Álvarez N, Heuertz M, Sanmartín I (2018) A tale of two forests: ongoing aridification drives population decline and genetic diversity loss at continental scale in Afro-Macaronesian evergreen-forest archipelago endemics. Annals of botany 122(6): 1005–1017.
Mairal M, Pokorny L, Aldasoro JJ, Alarcón M, Sanmartín I (2015) Ancient vicariance and climate‐driven extinction explain continental‐wide disjunctions in Africa: the case of the Rand Flora genus Canarina (Campanulaceae). Molecular ecology, 24(6): 1335–1354.
Mairal M, Sanmartín I, Herrero A, Pokorny L, Vargas P, Aldasoro JJ, Alarcón M (2017) Geographic barriers and Pleistocene climate change shaped patterns of genetic variation in the Eastern Afromontane biodiversity hotspot. Scientific Reports 7: 45749.
Mansion G, Parolly G, Crowl AA, Mavrodiev E, Cellinese N, Oganesian M, Fraunhofer K, Kamari G, Phitos D, Haberle R, Akaydin G (2012) How to handle speciose clades? Mass taxon-sampling as a strategy towards illuminating the natural history of Campanula (Campanuloideae). PloS one 7(11).
Martínez‐Blancas A, Paz H, Salazar GA, Martorell C (2018) Related plant species respond similarly to chronic anthropogenic disturbance: Implications for conservation decision‐making. Journal of Applied Ecology 55(4) 1860–1870.
Menezes T, Romeiras MM, de Sequeira MM, Moura M (2018) Phylogenetic relationships and phylogeography of relevant lineages within the complex Campanulaceae family in Macaronesia. Ecology and evolution 8(1): 88-108.
Michaels HJ, Scott KM, Olmstead RG, Szaro T, Jansen RK, Palmer JD (1993) Interfamilial relationships of the Asteraceae: insights from rbcL sequence variation. Annals of the Missouri Botanical Garden 742–751.
Moon BC, Kim WJ, Han KS, Yang S, Kang Y, Park I, Piao R (2017) Differentiating authentic Adenophorae radix from its adulterants in commercially-processed samples using multiplexed ITS sequence-based SCAR markers. Applied Sciences 7(7): 660.
Murray BG, Datson PM, Lai ELY, Sheath KM, Cameron EK (2004) Polyploidy, hybridization and evolution in Pratia (Campanulaceae). New Zealand Journal of Botany 42(5): 905–920.
Ndiribe C, Pellissier L, Antonelli S, Dubuis A, Pottier J, Vittoz P, Guisan A, Salamin N (2013) Phylogenetic plant community structure along elevation is lineage specific. Ecology and evolution 3(15): 4925–4939.
Nierbauer KU, Paule J, Zizka G (2017) Heteroploid reticulate evolution and taxonomic status of an endemic species with bicentric geographical distribution. AoB Plants 9(1).
Niu Y, Zhou Z, Sha W, Sun H (2016) Post-floral Erection of Stalks Provides Insight into the Evolution of Fruit Orientation and Its Effects on Seed Dispersal. Scientific reports 6: 20146.
Olmstead RG, Kim KJ, Jansen RK, Wagstaff SJ (2000) The phylogeny of the Asteridae sensu lato based on chloroplast ndhF gene sequences. Molecular phylogenetics and evolution 16(1): 96–112.
Pang X, Chen S (2006) Identification of medicinal plants using DNA barcoding technique. Encyclopedia of Analytical Chemistry: Applications, Theory and Instrumentation 1–4.
Papadopoulou A, Chesters D, Coronado I, De la Cadena G, Cardoso A, Reyes JC, Maes JM, Rueda RM, Gómez‐Zurita J (2015) Automated DNA‐based plant identification for large‐scale biodiversity assessment. Molecular Ecology Resources 15(1): 136–152.
Park JM, Liber Z, Eddie WM, Schneeweiss GM (2006) Phylogeny and biogeography of isophyllous species of Campanula (Campanulaceae) in the Mediterranean area. Systematic Botany 31(4): 862–880.
Pearse WD, Chase MW, Crawley MJ, Dolphin K, Fay MF, Joseph JA, Powney G, Preston CD, Rapacciuolo G, Roy DB, Purvis A (2015) Beyond the EDGE with EDAM: Prioritising british plant species according to evolutionary distinctiveness, and accuracy and magnitude of decline. PloS one 10(5).
Pérez-Espona S, Sales F, Hedge I, Möller M (2005) Phylogeny and species relationships in Jasione (Campanulaceae) with emphasis on the ‘Montana-complex’. Edinburgh Journal of Botany 62(1–2): 29–51.
Prebble JM, Cupido CN, Meudt HM, Garnock-Jones PJ (2011) First phylogenetic and biogeographical study of the southern bluebells (Wahlenbergia, Campanulaceae). Molecular Phylogenetics and Evolution 59(3): 636–648.
Prebble JM, Meudt HM, Garnock-Jones PJ (2012) An expanded molecular phylogeny of the southern bluebells (Wahlenbergia, Campanulaceae) from Australia and New Zealand. Australian Systematic Botany 25(1): 11–30.
Pillon Y, Johansen J, Sakishima T, Chamala S, Barbazuk WB, Stacy EA (2013) Primers for low‐copy nuclear genes in the Hawaiian endemic Clermontia (Campanulaceae) and cross‐amplification in Lobelioideae. Applications in plant sciences, 1(6): 1200450.
Pillon Y, Johansen J, Sakishima T, Chamala S, Barbazuk WB, Roalson EH, Stacy EA (2013) Potential use of low-copy nuclear genes in DNA barcoding: a comparison with plastid genes in two Hawaiian plant radiations. BMC evolutionary biology 13(1): 35.
Pillon Y, Stacy E, Meyer JY (2018) Phylogenetics and systematics of the South Polynesian genera Apetahia and Sclerotheca (Campanulaceae subfam. Lobelioideae). Botany Letters 165(2): 186–192.
Roquet C, Sáez L, José Aldasoro J, Susanna A, Luisa Alarcón M, Garcia-Jacas N (2008) Natural delineation, molecular phylogeny and floral evolution in Campanula. Systematic Botany 33(1): 203–217.
Roquet C, Sanmartín I, Garcia-Jacas N, Sáez L, Susanna A, Wikström N, Aldasoro JJ (2009) Reconstructing the history of Campanulaceae with a Bayesian approach to molecular dating and dispersal–vicariance analyses. Molecular Phylogenetics and Evolution 52(3): 575–587.
Savolainen V, Chase MW, Hoot SB, Morton CM, Soltis DE, Bayer C, Fay MF, De Bruijn AY, Sullivan S, Qiu YL (2000) Phylogenetics of flowering plants based on combined analysis of plastid atpB and rbcL gene sequences. Systematic biology 49(2): 306–362.
Schaefer H, Hardy OJ, Silva L, Barraclough TG, Savolainen V (2011) Testing Darwin’s naturalization hypothesis in the Azores. Ecology letters 14(4): 389–396.
Schaefer H, Moura M, Belo Maciel MG, Silva L, Rumsey FJ, Carine MA (2011) The Linnean shortfall in oceanic island biogeography: a case study in the Azores. Journal of Biogeography 38(7): 1345–1355.
Schneeweiss GM, Pachschwöll C, Tribsch A, Schönswetter P, Barfuss MH, Esfeld K, Weiss-Schneeweiss H, Thiv M (2013) Molecular phylogenetic analyses identify Alpine differentiation and dysploid chromosome number changes as major forces for the evolution of the European endemic Phyteuma (Campanulaceae). Molecular phylogenetics and evolution 69(3): 634–652.
Schultheis LM (2001) Systematics of Downingia (Campanulaceae) based on molecular sequence data: implications for floral and chromosome evolution. Systematic Botany 26(3): 603–621.
Senni K, Fujii N, Takahashi H, Sugawara T, Wakabayashi M (2005) Intraspecific chloroplast DNA variations of the alpine plants in Japan. Acta phytotaxonomica et geobotanica 56(3): 265–275.
Shapcott A, Forster PI, Guymer GP, McDonald WJ, Faith DP, Erickson D, Kress WJ (2015) Mapping biodiversity and setting conservation priorities for SE Queensland’s rainforests using DNA barcoding. PLoS One 10(3).
Škondrić S, Aleksić JM, Lakušić D (2014) Campanula cichoracea (Campanulaceae), a neglected species from the Balkan-Carpathian C. lingulata complex as inferred from molecular and morphological characters. Willdenowia 77–96.
Song J, Yao H, Li Y, Li X, Lin Y, Liu C, Han J, Xie C, Chen S (2009) Authentication of the family Polygonaceae in Chinese pharmacopoeia by DNA barcoding technique. Journal of Ethnopharmacology 124(3): 434–439.
Stefanović S, Lakušić D (2009) Molecular reappraisal confirms that the Campanula trichocalycina-pichleri complex belongs to Asyneuma (Campanulaceae). Botanica Serbica 33(1): 21–31.
Stefanović S, Lakušić D, Kuzmina M, Međedović S, Tan K, Stevanović V (2008) Molecular phylogeny of Edraianthus (Grassy Bells; Campanulaceae) based on non‐coding plastid DNA sequences. Taxon 57(2): 452–475.
Surina B, Schönswetter P, Schneeweiss GM (2011) Quaternary range dynamics of ecologically divergent species (Edraianthus serpyllifolius and E. tenuifolius, Campanulaceae) within the Balkan refugium. Journal of Biogeography 38(7): 1381–1393.
Sylvester SP, Quandt D, Ammann L, Kessler M (2016) The world’s smallest Campanulaceae: Lysipomia mitsyae sp. nov. Taxon 65(2); 305–314.
Tan SL, Luo YH, Hollingsworth PM, Burgess KS, Xu K, Li DZ, Gao LM (2018) DNA barcoding herbaceous and woody plant species at a subalpine forest dynamics plot in Southwest China. Ecology and evolution 8(14): 7195–7205.
Tank DC, Donoghue MJ (2010) Phylogeny and phylogenetic nomenclature of the Campanulidae based on an expanded sample of genes and taxa. Systematic Botany 35(2): 425–441.
Thornhill AH, Baldwin BG, Freyman WA, Nosratinia S, Kling MM, Morueta-Holme N, Madsen TP, Ackerly DD, Mishler BD (2017) Spatial phylogenetics of the native California flora. BMC biology 15(1): 96.
Tian S, Chen S, Li H, Zhang Z, Wu D (2016) Evaluation of the standard DNA barcodes in Adenophora (Campanulaceae) and its phylogenetic analysis based on ITS sequences. Life Science Journal 13(8).
Trias-Blasi A, Eddie WM, Hedge IC, Möller M, Sales F (2011) The taxonomy and conservation of Campanula primulifolia (Campanulaceae), a critically endangered species in the Iberian Peninsula. Willdenowia 41(1): 35–42.
Trotta LB, Baiser B, Possley J, Li D, Lange J, Martin S, Sessa EB (2018) Community phylogeny of the globally critically imperiled pine rockland ecosystem. American journal of botany 105(10): 1735–1747.
Uribe-Convers S, Carlsen MM, Lagomarsino LP, Muchhala N (2017) Phylogenetic relationships of Burmeistera (Campanulaceae: Lobelioideae): combining whole plastome with targeted loci data in a recent radiation. Molecular phylogenetics and evolution 107: 551–563.
Uys E, Cron GV (2013) Relationships and evolution in the Drakensberg near-endemic genus, Craterocapsa (Campanulaceae). South African Journal of Botany 86: 79–91.
Vindas-Rodríguez M, Rojas-Jiménez K, Tamayo-Castillo G (2011) Evaluation of three chroroplastic markers for barcoding and for phylogenetic reconstruction purposes in native plants of Costa Rica. Revista de Ciencia y Tecnología 27(1–2).
Wang Q, Hong DY (2014) Codonopsis gongshanica (Campanulaceae), a new species from NW Yunnan base on morphology and molecular phylogenetic analysis. Phytotaxa, 188(3), 145–152.
Wang Q, Hong DY (2015) Taxonomic revision of the genus Pseudocodon (Campanulaceae) based on character analysis and molecular phylogeny. Phytotaxa 204(1): 049–064.
Wang Q, Zhou SL, Hong DY (2013) Molecular phylogeny of the platycodonoid group (Campanulaceae s. str.) with special reference to the circumscription of Codonopsis. Taxon, 62(3): 498–504.
Wang DY, Wang Q, Wang YL, Xiang XG, Huang LQ, Jin XH (2017) Evaluation of DNA barcodes in Codonopsis (Campanulaceae) and in some large angiosperm plant genera. PloS one 12(2).
Wang YC, Zhou YF, Chen C, Mao SL (2018) The complete chloroplast genome sequence of Echinocodon Lobophyllus (Campanulaceae) revealed by next-generation sequencing and phylogenetic implication. Mitochondrial DNA Part B 3(1): 450-451.
Wendling BM, Galbreath KE, DeChaine EG (2011) Resolving the evolutionary history of Campanula (Campanulaceae) in western North America. Plos One 6(9).
Xiang QY, Soltis DE, Morgan DR, Soltis PS (1993) Phylogenetic relationships of Cornus L. sensu lato and putative relatives inferred from rbcL sequence data. Annals of the Missouri Botanical Garden 723–734.
Xu C, Hong DY (2020) Phylogenetic analyses confirm polyphyly of the genus Campanula (Campanulaceae s. str.), leading to a proposal for generic reappraisal. Journal of Systematics and Evolution.
Xu H, Wang Z, Ding X, Zhou K, Xu L (2006) Differentiation of Dendrobium species used as” Huangcao Shihu” by rDNA ITS sequence analysis. Planta Medica 72(01): 89–92.
Yamamoto S, Uchida K (2018). A generalist herbivore requires a wide array of plant species to maintain its populations. Biological Conservation 228: 167–174.
Yi XY, Xie D, Zhang C, Wang YQ, Kang YQ, Subedee BR, Zhang DG (2019) Adenophora xiaoxiensis (Campanulaceae), an Endangered Species from China. Phytotaxa 402(2): 88–96.
Yoo KO, Cheon KS, Kim KA (2016) Complete chloroplast genome sequence of Campanula punctata Lam.(Campanulaceae). Mitochondrial DNA Part B 1(1): 184–185.
Yoo KO, Crowl AA, Kim KA, Cheon KS, Cellinese N (2018) Origins of East Asian Campanuloideae (Campanulaceae) diversity. Molecular phylogenetics and evolution 127: 468–474.
Yoo KO, Lee WT (1989) A taxonomic study of the genus Codonopsis in Korea. Korean Journal of Plant Taxonomy 19(2): 81–102.
Zhao S, Xin T, Hou D, Pang X, Chen R, Gao J (2013) Identification of Codonopsis Radix and its adulterants using the ITS/ITS2 barcodes. World Science and Technology-Modernization of Traditional Chinese Medicine (3): 421–428.
Zhang HX, Zhang ML (2012) Genetic structure of the Delphinium naviculare species group tracks Pleistocene climatic oscillations in the Tianshan Mountains, arid Central Asia. Palaeogeography, Palaeoclimatology, Palaeoecology 353: 93–103.
Zhou Z, Hong D, Niu Y, Li G, Nie Z, Wen J, Sun H (2013) Phylogenetic and biogeographic analyses of the Sino-Himalayan endemic genus Cyananthus (Campanulaceae) and implications for the evolution of its sexual system. Molecular Phylogenetics and Evolution 68(3): 482–497.
Zhou Z, Wen J, Li G, Sun H (2012) Phylogenetic assessment and biogeographic analyses of tribe Peracarpeae (Campanulaceae). Plant systematics and evolution 298(2): 323–336.
Zúñiga JD, Gostel MR, Mulcahy DG, Barker K, Hill A, Sedaghatpour M, Vo SQ, Funk VA, Coddington JA (2017) Data Release: DNA barcodes of plant species collected for the Global Genome Initiative for Gardens Program, National Museum of Natural History, Smithsonian Institution. PhytoKeys (88): 119.

## Sheet: globalbioticinteractionsnomerma
label	IRI	definition
acquires nutrients from	http://purl.obolibrary.org/obo/RO_0002457	needs definition
allelopath of	http://purl.obolibrary.org/obo/RO_0002555	needs definition
biotically interacts with	http://purl.obolibrary.org/obo/RO_0002437	An interaction relationship in which at least one of the partners is an organism and the other is either an organism or an abiotic entity with which the organism interacts.
commensually interacts with	http://purl.obolibrary.org/obo/RO_0002441	An interaction relationship between two organisms living together in more or less intimate association in a relationship in which one benefits and the other is unaffected (GO).
eats	http://purl.obolibrary.org/obo/RO_0002470	needs definition
ectoparasite of	http://purl.obolibrary.org/obo/RO_0002632	A sub-relation of parasite-of in which the parasite lives on or in the integumental system of the host
endoparasite of	http://purl.obolibrary.org/obo/RO_0002634	needs definition
epiphyte of	http://purl.obolibrary.org/obo/RO_0008501	An interaction relationship wherein a plant or algae is living on the outside surface of another plant.
facultative parasite of	http://purl.obolibrary.org/obo/RO_0002228	A sub-relations of parasite-of in which the parasite that can complete its life cycle independent of a host.
has ectoparasite	http://purl.obolibrary.org/obo/RO_0002633	inverse of ectoparasite of
has eggs laid in by	http://purl.obolibrary.org/obo/RO_0002625	needs definition
has eggs laid on by	http://purl.obolibrary.org/obo/RO_0008508	inverse of lays eggs on
has endoparasite	http://purl.obolibrary.org/obo/RO_0002635	needs definition
has epiphyte	http://purl.obolibrary.org/obo/RO_0008502	inverse of epiphyte of
has flowers visited by	http://purl.obolibrary.org/obo/RO_0002623	needs definition
has host	http://purl.obolibrary.org/obo/RO_0002454	needs definition
has intercellular endoparasite	http://purl.obolibrary.org/obo/RO_0002639	inverse of intercellular endoparasite of
has intracellular endoparasite	http://purl.obolibrary.org/obo/RO_0002641	inverse of intracellular endoparasite of
has mesoparasite	http://purl.obolibrary.org/obo/RO_0002637	inverse of mesoparasite of
has parasitoid	http://purl.obolibrary.org/obo/RO_0002209	inverse of parasitoid of
has pathogen	http://purl.obolibrary.org/obo/RO_0002557	needs definition
has vector	http://purl.obolibrary.org/obo/RO_0002460	needs definition
hemiparasite of	http://purl.obolibrary.org/obo/RO_0002237	A sub-relation of parasite-of in which the parasite is a plant, and the parasite is parasitic under natural conditions and is also photosynthetic to some degree. Hemiparasites may just obtain water and mineral nutrients from the host plant. Many obtain at least part of their organic nutrients from the host as well.
host of	http://purl.obolibrary.org/obo/RO_0002453	needs definition
hyperparasite of	http://purl.obolibrary.org/obo/RO_0002553	x is a hyperparasite of y iff x is a parasite of a parasite of the target organism y
hyperparasitized by	http://purl.obolibrary.org/obo/RO_0002554	inverse of hyperparasite of
interacts with via parasite-host interaction	http://purl.obolibrary.org/obo/RO_0002443	An interaction relationship between two organisms living together in more or less intimate association in a relationship in which association is disadvantageous or destructive to one of the organisms (GO).
intercellular endoparasite of	http://purl.obolibrary.org/obo/RO_0002638	A sub-relation of endoparasite-of in which the parasite inhabits the spaces between host cells.
intracellular endoparasite of	http://purl.obolibrary.org/obo/RO_0002640	A sub-relation of endoparasite-of in which the parasite inhabits host cells.
is eaten by	http://purl.obolibrary.org/obo/RO_0002471	needs definition
is killed by	http://purl.obolibrary.org/obo/RO_0002627	needs definition
is vector for	http://purl.obolibrary.org/obo/RO_0002459	needs definition
kills	http://purl.obolibrary.org/obo/RO_0002626	needs definition
kleptoparasite of	http://purl.obolibrary.org/obo/RO_0008503	A sub-relation of parasite of in which a parasite steals resources from another organism, usually food or nest material
kleptoparasitized by	http://purl.obolibrary.org/obo/RO_0008504	inverse of kleptoparasite of
lays eggs in	http://purl.obolibrary.org/obo/RO_0002624	needs definition
lays eggs on	http://purl.obolibrary.org/obo/RO_0008507	An interaction relationship in which organism a lays eggs on the outside surface of organism b. Organism b is neither helped nor harmed in the process of egg laying or incubation.
mesoparasite of	http://purl.obolibrary.org/obo/RO_0002636	A sub-relation of parasite-of in which the parasite is partially an endoparasite and partially an ectoparasite
mutualistically interacts with	http://purl.obolibrary.org/obo/RO_0002442	An interaction relationship between two organisms living together in more or less intimate association in a relationship in which both organisms benefit from each other (GO).
obligate parasite of	http://purl.obolibrary.org/obo/RO_0002227	A sub-relation of parasite-of in which the parasite that cannot complete its life cycle without a host.
parasite of	http://purl.obolibrary.org/obo/RO_0002444	needs definition
parasitized by	http://purl.obolibrary.org/obo/RO_0002445	needs definition
parasitoid of	http://purl.obolibrary.org/obo/RO_0002208	A parasite that kills or sterilizes its host
participates in a abiotic-biotic interaction with	http://purl.obolibrary.org/obo/RO_0002446	A biotic interaction relationship in which one partner is an organism and the other partner is inorganic. For example, the relationship between a sponge and the substrate to which is it anchored.
participates in a biotic-biotic interaction with	http://purl.obolibrary.org/obo/RO_0002574	needs definition
pathogen of	http://purl.obolibrary.org/obo/RO_0002556	needs definition
pollinated by	http://purl.obolibrary.org/obo/RO_0002456	needs definition
pollinates	http://purl.obolibrary.org/obo/RO_0002455	needs definition
preyed upon by	http://purl.obolibrary.org/obo/RO_0002458	inverse of preys on
preys on	http://purl.obolibrary.org/obo/RO_0002439	An interaction relationship involving a predation process, where the subject kills the target in order to eat it or to feed to siblings, offspring or group members
provides nutrients for	http://purl.obolibrary.org/obo/RO_0002469	needs definition
root parasite of	http://purl.obolibrary.org/obo/RO_0002236	A parasite-of relationship in which the host is a plant and the parasite that attaches to the host root (PO:0009005)
stem parasite of	http://purl.obolibrary.org/obo/RO_0002235	A parasite-of relationship in which the host is a plant and the parasite that attaches to the host stem (PO:0009047)
symbiotically interacts with	http://purl.obolibrary.org/obo/RO_0002440	A biotic interaction in which the two organisms live together in more or less intimate association.
trophically interacts with	http://purl.obolibrary.org/obo/RO_0002438	An interaction relationship in which the partners are related via a feeding relationship.
visited by	http://purl.obolibrary.org/obo/RO_0002619	needs definition
visits	http://purl.obolibrary.org/obo/RO_0002618	needs definition
visits flowers of	http://purl.obolibrary.org/obo/RO_0002622	needs definition

## Sheet: envo-environments
label	IRI	definition
acidic environment	http://purl.obolibrary.org/obo/ENVO_01000315	An acidic environment is an environment in which material entities are exposed to a low pH.
aerosol environment	http://purl.obolibrary.org/obo/ENVO_01001052	An environmental system which has its properties and dynamics determined by an aerosol.
alkaline environment	http://purl.obolibrary.org/obo/ENVO_01000316	An alkaline environment is an environment in which entities are exposed to high pH, typically greater than a pH of 9.
alpine tree line ecotone	http://purl.obolibrary.org/obo/ENVO_01000954	A tree line ecotone across which trees cease to grow due to the low temperatures or duration of snow cover that occur at increased elevations above mean sea level.
alpine tundra biome	http://purl.obolibrary.org/obo/ENVO_01001505	A tundra biome which exists at high altitudes and where vegetation - dominated by a few species of dwarf shrubs, a few grasses, sedges, lichens, and mosses - is stunted due to low temperatures and high winds.
alpine tundra ecosystem	http://purl.obolibrary.org/obo/ENVO_01001371	A tundra ecosystem which exists at high altitudes and where vegetation is stunted due to low temperatures and high winds.
anatomical entity environment	http://purl.obolibrary.org/obo/ENVO_2100000	An environment which is determined by an anatomical entity.
animal-associated environment	http://purl.obolibrary.org/obo/ENVO_01001002	An environmental system determined by an animal.
anthropogenic environment	http://purl.obolibrary.org/obo/ENVO_01000313	An anthropogenic environment is an environmental system which is the product of human activity.
anthropogenic terrestrial biome	http://purl.obolibrary.org/obo/ENVO_01000219	An anthropogenic terrestrial biome is a terrestrial biome which has community structures determined by human activity.
aquatic environment	http://purl.obolibrary.org/obo/ENVO_01000317	An environment whose dynamics are strongly influenced by water.
aquatic natural environment	http://purl.obolibrary.org/obo/ENVO_01001227	A natural environment which is within a water body.
axilla skin environment	http://purl.obolibrary.org/obo/ENVO_08000001	An environment that is determined by an axilla skin.
Bathymodiolus-dominated oceanic mussel bed	http://purl.obolibrary.org/obo/ENVO_01001387	An oceanic mussel reef which is primarily settled by mussels of the genus Bathymodiolus and primarily composed of self-adhered or conglomerated mussel shells
Bathymodiolus-dominated oceanic mussel bed	http://purl.obolibrary.org/obo/ENVO_01001390	An oceanic mussel bed which has mussel communities dominated by members of the genus Bathymodiolus.
Bathymodiolus-dominated oceanic mussel reef	http://purl.obolibrary.org/obo/ENVO_01001385	An oceanic mussel reef which is primarily settled by mussels of the genus Bathymodiolus and primarily composed of self-adhered or conglomerated mussel shells
biocrust	http://purl.obolibrary.org/obo/ENVO_01000909	A surface layer of a solid environmental material which is formed by the presence and activity of photosynthetic microbial assemblages colonising it.
biosphere	http://purl.obolibrary.org/obo/ENVO_01000817	A biosphere is a part of an astronomical body which includes, as parts, all the living entities within the gravitational sphere of influence of that body, as well as the non-living and dead entities with which they interact.
Bondon cheese environment	http://purl.obolibrary.org/obo/ENVO_01001180	An environment which has its properties and composition determined by a portion of Bondon cheese.
bone element environment	http://purl.obolibrary.org/obo/ENVO_01001306	An environment which is determined by a bone element.
brackish water environment	http://purl.obolibrary.org/obo/ENVO_01000322	An environment determined by the presence of brackish water.
broadleaf forest biome	http://purl.obolibrary.org/obo/ENVO_01000197	A broadleaf forest biome is a forest biome which contains densely packed populations or communities of broadleaf trees, strongly limiting light penetration to the forest floor.
Calyptra habitat	http://purl.obolibrary.org/obo/ENVO_01001452	A habitat which supports the persistence and growth of a population of Calyptra moths and which overlaps mesic meadows and edges and clearings in vegetated areas.
climate system	http://purl.obolibrary.org/obo/ENVO_01001364	A system which consists of an atmosphere, hydrosphere, cryosphere, land surface, and biosphere, forced or influenced by external processes.
cloud forest	http://purl.obolibrary.org/obo/ENVO_01001457	A montane forest ecosystem which 1) is evergreen, 2) present on mountains where there is frequent cloud and mist cover, 3) which has a large proportion of ferns and mosses in its plant communities, growing on all tree trunks and branches present in the ecosystem, and 3) harvests aerosolised water and adds it to the terrestrial water supply.
cnidarian-associated environment	http://purl.obolibrary.org/obo/ENVO_01001179	An environmental system determined by a cnidarian or part of a cnidarian.
coastal wetland ecosystem	http://purl.obolibrary.org/obo/ENVO_00000230	A wetland ecosystem which overlaps both terrestrial and marine ecosystems.
cold environment	http://purl.obolibrary.org/obo/ENVO_01000309	An environment which has a lower temperature than some local or global average.
concentration basin mediterranean sea biome	http://purl.obolibrary.org/obo/ENVO_01000004	The concentration basin mediterranean sea biome comprises expressions of the mediterranean sea biome that have higher salinity than bordering oceans due to evaporation. Water exchange consists of inflow of the fresher oceanic water in the upper layer and outflow of the saltier mediterranean water in the lower layer of the connecting channel.
coniferous forest biome	http://purl.obolibrary.org/obo/ENVO_01000196	A coniferous forest biome is a forest biome which contains densely packed populations or communities of coniferous trees, strongly limiting light penetration to the forest floor.
cropland biome	http://purl.obolibrary.org/obo/ENVO_01000245	A cropland biome is an anthropogenic terrestrial biome which is primarily used for agricultural activity and which contains no village or larger human settlement.
cropland ecosystem	http://purl.obolibrary.org/obo/ENVO_01001244	An ecosystem which is determined by communities of annual crops, perennial woody crops, or by actively tilled land.
cultivated environment	http://purl.obolibrary.org/obo/ENVO_01000311	A cultivated environment is an environment that has been modified by humans by the preparation of the land, usually for the purposes of growing crops.
culturing environment	http://purl.obolibrary.org/obo/ENVO_01000312	A culturing environment is an environment which is maintained by humans for the purposes of preparing cell, organ, tissue and plant tissue cultures.
cypress dome	http://purl.obolibrary.org/obo/ENVO_01000329	A cypress dome swamp is a dome swamp which has a plant community dominated by Cupressaceae, often swamp cypresses. Swamp cypresses typically belong to the genus Taxodium or the species Glyptostrobus pensilis and Actinostrobus pyramidalis.
cypress strand swamp	http://purl.obolibrary.org/obo/ENVO_01000330	A cypress strand swamp is a strand swamp which has a plant community dominated by Cupressaceae, often swamp cypresses. Swamp cypresses typically belong to the genus Taxodium or the species Glyptostrobus pensilis and Actinostrobus pyramidalis.
cypress swamp	http://purl.obolibrary.org/obo/ENVO_01000331	A cypress swamp is a swamp which has a plant community dominated by Cupressaceae, often swamp cypresses. Swamp cypresses typically belong to the genus Taxodium or the species Glyptostrobus pensilis and Actinostrobus pyramidalis.
dambo	http://purl.obolibrary.org/obo/ENVO_00000236	A class of complex shallow wetlands in central, southern and eastern Africa, particularly in Zambia and Zimbabwe. They are generally found in higher rainfall flat plateau areas, and have river-like branching forms which may be nowhere very large, but common enough to add up to a large area.
dense settlement biome	http://purl.obolibrary.org/obo/ENVO_01000248	A dense settlement biome is an anthropogenic terrestrial biome which is primarily used for human habitation, recreation, and industry within built structures with little other land use.
desert biome	http://purl.obolibrary.org/obo/ENVO_01000179	A desert biome is a terrestrial biome which loses more liquid water by evapotranspiration than is supplied by precipitation and includes communities adapted to these conditions.
desert tree line ecotone	http://purl.obolibrary.org/obo/ENVO_01000955	A tree line ecotone across which trees cease to grow due to insufficient water availability due to a lack of water-based precipitation.
desert-alpine tree line ecotone	http://purl.obolibrary.org/obo/ENVO_01000956	A tree line ecotone across which trees cease to grow due to insufficient water availability caused by exposure to increased solar radiation and a lack of rainfall.
digestive tract environment	http://purl.obolibrary.org/obo/ENVO_01001033	An environmental system which has its properties and dynamics determined by a digestive tract.
dilution basin mediterranean sea biome	http://purl.obolibrary.org/obo/ENVO_01000128	The dilution basin mediterranean sea biome comprises expressions of the mediterranean sea biome with lower salinity than the surrounding ocean due to freshwater gains such as rainfall and rivers. Water exchange consists of outflow of the fresher mediterranean water in the upper layer and inflow of the saltier oceanic water in the lower layer of the channel. Renewal of deep water may not be suffic…
dome swamp	http://purl.obolibrary.org/obo/ENVO_01000328	A dome swamp is a swamp which occurs in a depression where deeper waters at the centre of the swamp allow trees to grow taller relative to those in shallower regions of the depression. This creates a dome-like shape.
double tree line ecotone	http://purl.obolibrary.org/obo/ENVO_01000957	A tree line ecotone which contains gaps in tree coverage due to decreased biodiversity in tree-forming plant species: gaps are above the alpine tree line for some species yet below the desert tree line for others, and no species with intermediate tolerances are present.
ecological corridor	http://purl.obolibrary.org/obo/ENVO_01000930	An ecosystem which bridges two or more adjoining ecosystems and through which organisms may move or propagate.
ecosystem	http://purl.obolibrary.org/obo/ENVO_01001110	An environmental system which includes both living and non-living components.
ecosystem fragment	http://purl.obolibrary.org/obo/ENVO_01001167	An ecosystem which has been causally isolated from a larger ecosystem within which it was previously embedded, such that the direct exchange of materials, resources, and energy between these systems is severely or entirely curtailed.
ecotone	http://purl.obolibrary.org/obo/ENVO_01000947	An envirommental system which bridges two or more biomes and which includes ecological communities which blend these biomes' phylogenetic and phenotypic compositions.
endolithic environment	http://purl.obolibrary.org/obo/ENVO_01000303	An endolithic environment is an environment that exists within solid rock.
environment associated with a fungal tissue	http://purl.obolibrary.org/obo/ENVO_01001058	An environmental system determined by part of a living or dead fungus.
environment associated with a plant part or small plant	http://purl.obolibrary.org/obo/ENVO_01001057	An environmental system determined by part of a living or dead plant, or a whole small plant.
environment associated with an animal part or small animal	http://purl.obolibrary.org/obo/ENVO_01001055	An environmental system determined by part of a living or dead animal, or a whole small animal.
environment associated with an aquatic invertebrate	http://purl.obolibrary.org/obo/ENVO_01001176	An environment which has its properties and composition largely determined by the presence of a metazoan which lacks a vetebral column and which has a habitat that is found in an aquatic environmental system.
environment determined by a biofilm on a fungal surface	http://purl.obolibrary.org/obo/ENVO_01001035	An environmental system which has its properties and dynamics determined by a biofilm on the surface of a fungus.
environment determined by a biofilm on a non-saline surface	http://purl.obolibrary.org/obo/ENVO_01001051	An environmental system which has its properties and dynamics determined by a biofilm on a surface which is exposed to non-saline materials.
environment determined by a biofilm on a plant surface	http://purl.obolibrary.org/obo/ENVO_01001032	An environmental system which has its properties and dynamics determined by a biofilm on the surface of a plant.
environment determined by a biofilm on a saline surface	http://purl.obolibrary.org/obo/ENVO_01001056	An environmental system which has its properties and dynamics determined by a biofilm on a surface which is exposed to saline materials.
environment determined by a biofilm on an animal surface	http://purl.obolibrary.org/obo/ENVO_01001034	An environmental system which has its properties and dynamics determined by a biofilm on the surface of a animal.
environment determined by a metazoan secretion	http://purl.obolibrary.org/obo/ENVO_01001030	An environmental system which has its properties and dynamics determined by a bodily secretion of a metazoan.
environment determined by a plant substance	http://purl.obolibrary.org/obo/ENVO_01001031	An environmental system which has its properties and dynamics determined by a substance produced by a plant.
environmental system determined by a material	http://purl.obolibrary.org/obo/ENVO_01000998	An environmental system within which an environmental material strongly influences the system's composition and properties.
environmental system determined by a quality	http://purl.obolibrary.org/obo/ENVO_01000997	An environmental system which is determined by materials bearing roughly homogeneous qualities.
environmental system determined by an organism	http://purl.obolibrary.org/obo/ENVO_01001000	An environmental system which is determined by a living organism.
epeiric sea biome	http://purl.obolibrary.org/obo/ENVO_01000045	The epeiric sea (also known as an epicontinental sea) biome comprises a shallow seas that extend over part of a continent. Epeiric seas are usually associated with the marine transgressions of the geologic past, which have variously been due to either global eustatic sea level changes, local tectonic deformation, or both, and are occasionally semi-cyclic.
estuarine biome	http://purl.obolibrary.org/obo/ENVO_01000020	Expressions of the estuarine biome occur at wide lower courses of a rivers where they flow into a sea. Estuaries experience tidal flows and their water is a changing mixture of fresh and salt.
extraterrestrial environment	http://purl.obolibrary.org/obo/ENVO_01000308	An environmental system which is located beyond the Earth's exosphere and away from the Earth's core.
extreme high temperature environment	http://purl.obolibrary.org/obo/ENVO_01000318	An extreme high temperature environment is a high temperature environment in which entities are exposed to temperatures above 80 degrees Celsius.
fecal environment	http://purl.obolibrary.org/obo/ENVO_01001029	An environmental system which has its properties and dynamics determined by feces.
flood meadow ecosystem	http://purl.obolibrary.org/obo/ENVO_00000154	An area of grassland or pasture beside a river, subject to seasonal flooding.
flooded savanna biome	http://purl.obolibrary.org/obo/ENVO_01000190	A flooded savanna biome is a savanna biome which has very wet to saturated soil moisture content.
fluvial dambo	http://purl.obolibrary.org/obo/ENVO_00000238	A dambo associated with a river.
forest biome	http://purl.obolibrary.org/obo/ENVO_01000174	A forest biome is a terrestrial biome which includes, across its entire spatial extent, densely packed vegetation which strongly limits light penetration to the forest floor.
forest ecosystem	http://purl.obolibrary.org/obo/ENVO_01001243	An ecosystem which is determined by communities of plants with a tree growth form and in which members of those communities form continuous or discontinuous regions of canopy cover.
freshwater biome	http://purl.obolibrary.org/obo/ENVO_00000873	A biome that applies to the freshwater realm.
freshwater environment	http://purl.obolibrary.org/obo/ENVO_01000306	An aquatic environment which is determined by freshwater.
freshwater marsh	http://purl.obolibrary.org/obo/ENVO_00000053	A marsh in which soils are saturated with water that contains low concentrations of salts.
freshwater wetland ecosystem	http://purl.obolibrary.org/obo/ENVO_00000243	A wetland which is inundated with water that contains low concentrations of salts.
fungi-associated environment	http://purl.obolibrary.org/obo/ENVO_01001041	An environmental system determined by a fungal structure.
grassland biome	http://purl.obolibrary.org/obo/ENVO_01000177	A grassland biome is a terrestrial biome which includes, across its entire spatial extent, an unbroken layer of grasses (Gramineae), sedges (Cyperaceae) or rushes (Juncaceae).
grassland ecosystem	http://purl.obolibrary.org/obo/ENVO_01001206	An ecosystem in which grasses (Graminae) are the dominant form of vegetation and determine the system's structure and dynamics.
habitat	http://purl.obolibrary.org/obo/ENVO_01000739	An environmental system which can sustain and allow the growth of an ecological population.
haline environment	http://purl.obolibrary.org/obo/ENVO_01000310	A haline environment is an environment in which entities are exposed to high concentrations of salt, typically above 2 molar.
high osmolarity environment	http://purl.obolibrary.org/obo/ENVO_01000314	A high osmolarity environment is an environment in which entities are exposed to high concentrations of solutes.
high pressure environment	http://purl.obolibrary.org/obo/ENVO_01000304	A high pressure environment is an environment in which all material entities are exposed to a high ratio of force per unit area.
high temperature environment	http://purl.obolibrary.org/obo/ENVO_01000305	A high temperature environment is an environment in which material entities are exposed to increased levels of heat radiation or which have molecules or atoms moving randomly with increased levels of average kinietic energy.
hydromorphic/phreatic dambo	http://purl.obolibrary.org/obo/ENVO_00000237	A danbo associated with a headwater.
hypersaline water environment	http://purl.obolibrary.org/obo/ENVO_01001043	An environmental system which has its properties and dynamics determined by hypersaline water.
intertidal ecosystem	http://purl.obolibrary.org/obo/ENVO_01001468	An ecosystem which overlaps those areas of the foreshore and seabed that are exposed to the air at low tide and submerged at high tide.
intestine environment	http://purl.obolibrary.org/obo/ENVO_2100002	An environmental system determined by an intestine.
laboratory environment	http://purl.obolibrary.org/obo/ENVO_01001405	An anthropogenic environment which is bounded by the building envelope of a laboratory and in which a system of manufactured products exert control on one or more of its environmental conditions.
lacustrine mudflat	http://purl.obolibrary.org/obo/ENVO_00000242	A wetland that forms when mud is deposited by a stream.
mangrove biome	http://purl.obolibrary.org/obo/ENVO_01000181	A mangrove biome is a terrestrial biome which includes, across its spatial extent, mangrove plants (Rhizophoraceae). Mangrove plants are able to withstand high levels of salinity as well as regions of anoxia and frequent tidal inundation. Mangrove biomes often occur near tropical and sub-tropical estuaries and depositional marine coastal environments where fine sediments (often with high organic …
mangrove island	http://purl.obolibrary.org/obo/ENVO_00000103	An island formed of trees and shrubs that grow in saline coastal habitats in the tropics and subtropics.
mangrove swamp	http://purl.obolibrary.org/obo/ENVO_00000057	A swamp which is located in tropical or subtropical environments and is determined by communities of trees and shrubs growing saline coastal environments.
marginal sea biome	http://purl.obolibrary.org/obo/ENVO_01000046	The marginal sea biome comprises parts of an ocean partially enclosed by land such as islands, archipelagos, or peninsulas. Unlike mediterranean seas, marginal seas have ocean currents caused by ocean winds. Many marginal seas are enclosed by island arcs that were formed from the subduction of one oceanic plate beneath another.
marine abyssal zone biome	http://purl.obolibrary.org/obo/ENVO_01000027	The marine abyssal zone biome comprises regions of the marine benthic biome between approximately 2500 m and 6000 m depth. This zone generally coincides with the continental rise and the abyssal plain.
marine basaltic hydrothermal vent biome	http://purl.obolibrary.org/obo/ENVO_01000054	A marine basaltic hydrothermal vent biome comprises regions of the marine hydrothermal vent biome hosted on basaltic rocks. Basalt generally has a composition of 45 to 55 wt % SiO2, 2 to 6 wt % total alkalis, 0.5 to 2.0 wt % TiO2, 5 to 14 wt % FeO and 14 wt % or more Al2O3. Contents of CaO are commonly near 10 wt %, those of MgO commonly in the range 5 to 12 wt %.
marine bathyal zone biome	http://purl.obolibrary.org/obo/ENVO_01000026	The marine bathyal zone biome comprises regions of the marine benthic biome between approximately 200 m and 3000 m depth. This zone generally coincides with the continental slope.
marine benthic biome	http://purl.obolibrary.org/obo/ENVO_01000024	The marine benthic biome (benthic meaning 'bottom') encompasses the seafloor and includes such areas as shores, littoral or intertidal areas, marine coral reefs, and the deep seabed.
marine biome	http://purl.obolibrary.org/obo/ENVO_00000447	An aquatic biome that comprises systems of open-ocean and unprotected coastal habitats, characterized by exposure to wave action, tidal fluctuation, and ocean currents as well as systems that largely resemble these. Water in the marine biome is generally within the salinity range of seawater: 30 to 38 ppt.
marine black smoker biome	http://purl.obolibrary.org/obo/ENVO_01000051	A marine black smoker biome comprises regions of the marine hydrothermal vent biome characterised by a black vent plume. This black plume is a consequence of dissolved metals and minerals forming complexes with sulphide and indicates polymetallic sulphide mineral deposits beneath the surface.
marine cold seep biome	http://purl.obolibrary.org/obo/ENVO_01000127	The marine cold seep biome comprises regions of the marine benthic biome where seepage of methane, hydrogen sulphide, hydrocarbon rich fluids and other fluids occurs.
marine coral reef biome	http://purl.obolibrary.org/obo/ENVO_01000049	The marine coral reef biome comprises constructional wave-resistant entities which are primarily built by corals and are often cemented together. The growth of these structures is aided by zooxanthellae, algae that are symbiotic with the reef-building corals.
marine environment	http://purl.obolibrary.org/obo/ENVO_01000320	A marine environment and enviroment which is determined by a marine water body.
marine faunal bed	http://purl.obolibrary.org/obo/ENVO_01001376	A marine bed which is covered by animals which have benthic habitats, including attached, clinging, sessile, infaunal, burrowing, laying, interstitial, and slow-moving animals, but not animals that have created substrate.
marine hadal zone biome	http://purl.obolibrary.org/obo/ENVO_01000028	The marine hadal zone biome describes sea floor deeper than 6000 m such as that of the oceanic trenches.
marine hydrothermal vent biome	http://purl.obolibrary.org/obo/ENVO_01000030	The marine hydrothermal vent biome comprises regions of the marine benthic biome where heat generated due to tectonic activity, either at divergent plate boundaries or convergent ocean plates where back-arc spreading occurs, is released or 'vented' to the surface. The resultant high temperature water jets are laden with dissolved metals and minerals.
marine neritic benthic zone biome	http://purl.obolibrary.org/obo/ENVO_01000025	The marine neritic zone biome comprises sea floor from the high tide mark to a continental shelf break. This zone generally extends to 200 m below average sea level.
marine pelagic biome	http://purl.obolibrary.org/obo/ENVO_01000023	The marine pelagic biome (pelagic meaning open sea) is that of the marine water column, from the surface to the greatest depths.
marine reef biome	http://purl.obolibrary.org/obo/ENVO_01000029	A biome expressed by strips or ridges of rocks, sand, or coral that rises to or near the surface of a body of marine water.
marine salt marsh biome	http://purl.obolibrary.org/obo/ENVO_01000022	The marine salt marsh biome comprises marshes that are transitional intertidals between land and salty or brackish marine water (e.g.: sloughs, bays, estuaries). It is dominated by halophytic (salt tolerant) herbaceous plants. The daily tidal surges bring in nutrients, which tend to settle in roots of the plants within the salt marsh. The natural chemical activity of salty (or brackish) water and…
marine sponge reef biome	http://purl.obolibrary.org/obo/ENVO_01000123	The marine sponge reef biome comprises marine reefs primarily built by marine sponges. The primary frame-building sponges are all members of the order Hexactinosa. They are found only in glacier-scoured troughs of low-angle continental shelf. The seafloor is stable and consists of rock, coarse gravel, and large boulders.
marine subtidal rocky reef biome	http://purl.obolibrary.org/obo/ENVO_01000050	The marine rocky subtidal reef biome comprises regions of the marine reef biome composed mainly of rock and which harbour abundant communities of algae and invertebrates. These reefs are often very patchy, with alterations of rocks dominated by rich invertebrate assemblages and turf-forming calcareous red algae.
marine ultramafic hydrothermal vent biome	http://purl.obolibrary.org/obo/ENVO_01000053	A marine ultramafic hydrothermal vent biome comprises regions of themarine hydrothermal vent biome hosted on ultramafic (also referred to as ultrabasic) rocks. Ultramafic rocks are igneous and meta-igneous rocks with very low silica content (less than 45%), generally >18% MgO, high FeO, low potassium, and are composed of usually greater than 90% mafic minerals (dark colored, high magnesium and ir…
marine upwelling biome	http://purl.obolibrary.org/obo/ENVO_01000858	A marine biome which contains communities adapted to living in an environment determined by an upwelling process.
marine white smoker biome	http://purl.obolibrary.org/obo/ENVO_01000052	A marine white smoker biome comprises regions of the marine hydrothermal vent biome characterised by lightly hued plumes, typically containing barium, calcium, and silicon. These vents tend to have lower temperature plumes when compared to black smoker environments.
marsh	http://purl.obolibrary.org/obo/ENVO_00000035	A wetland ecosystem which includes communities of grasses, rushes, reeds, typhas, sedges, and other herbaceous plants (possibly with low-growing woody plants).
meadow ecosystem	http://purl.obolibrary.org/obo/ENVO_00000108	A grassland ecosystem which contains a variety of annual, biennial and perennial plants growing on rolling or flat terrain.
mediterranean forest biome	http://purl.obolibrary.org/obo/ENVO_01000199	A mediterranean forest biome is a forest biome which includes communities adapted to hot to warm, dry summers, mild to cold, rainy winters, and the influence of large, usually marine, bodies of water.
mediterranean grassland biome	http://purl.obolibrary.org/obo/ENVO_01000224	A subtropical grassland biome which includes communities adapted to hot to warm, dry summers, mild to cold, rainy winters, and the influence of large, usually marine, bodies of water.
mediterranean savanna biome	http://purl.obolibrary.org/obo/ENVO_01000229	A savanna biome which is subject to mediterranean climate patterns.
mediterranean sea biome	http://purl.obolibrary.org/obo/ENVO_01000047	The mediterranean sea biome comprises mostly enclosed seas that have limited exchange of deep water with outer oceans and where the water circulation is dominated by salinity and temperature differences rather than winds.
mediterranean shrubland biome	http://purl.obolibrary.org/obo/ENVO_01000217	A mediterranean shrubland biome is a subtropical shrubland biome which includes communities adapted to hot to warm, dry summers, mild to cold, rainy winters, and the influence of large, usually marine, bodies of water.
mediterranean woodland biome	http://purl.obolibrary.org/obo/ENVO_01000208	A subtropical woodland biome which includes communities adapted to hot to warm, dry summers, mild to cold, rainy winters, and the influence of large, usually marine, bodies of water.
migration path	http://purl.obolibrary.org/obo/ENVO_01000931	An ecological corridor through which organisms move during a migration process.
mixed forest biome	http://purl.obolibrary.org/obo/ENVO_01000198	A mixed forest biome is a forest biome which contains densely packed populations or communities of broadleaf and coniferous trees, strongly limiting light penetration to the forest floor.
mixed grassland ecosystem	http://purl.obolibrary.org/obo/ENVO_01000448	A mixed grassland is a grassland which contains a mixture of tall and short grasses.
mock community	http://purl.obolibrary.org/obo/ENVO_01001059	A cell culture which is composed of a microbial community of known composition.
montane desert biome	http://purl.obolibrary.org/obo/ENVO_01000185	A montane desert biome is a desert biome which occurs in regions elevated above sea level and which has community structure determined by elevation-dependent environmental conditions.
montane grassland biome	http://purl.obolibrary.org/obo/ENVO_01000194	A montane grassland biome is a grassland biome which occurs in regions elevated above sea level and which has community structure determined by elevation-dependent environmental conditions.
montane savanna biome	http://purl.obolibrary.org/obo/ENVO_01000223	A montane savanna biome is a savanna biome which occurs in regions elevated above sea level and which has community structure determined by elevation-dependent environmental conditions.
montane shrubland biome	http://purl.obolibrary.org/obo/ENVO_01000216	A montane shrubland biome is a shrubland biome which occurs in regions elevated above sea level and which has community structure determined by elevation-dependent environmental conditions.
moor	http://purl.obolibrary.org/obo/ENVO_00000231	A wetland found in upland areas, characterised by acidic soils.
mouth environment	http://purl.obolibrary.org/obo/ENVO_08000002	An environment that is determined by a mouth.
mudflat	http://purl.obolibrary.org/obo/ENVO_00000192	A wetland that forms when mud is deposited by the tides, rivers, sea or oceans.
mussel bed	http://purl.obolibrary.org/obo/ENVO_01001379	A marine faunal bed which is dominated by mussels of the Mytilus or Modiolus genera either 1) resting on the sediment surface, 2) partially embedded in the sediment, 3) attached to conspecifics (by using their byssal threads), or 4) attached to a piece of gravel in slightly gravelly fine sediments.
mussel reef	http://purl.obolibrary.org/obo/ENVO_01001386	A marine reef which is primarily composed of self-adhered or conglomerated mussel shells.
natural environment	http://purl.obolibrary.org/obo/ENVO_01000951	An environmental system in which minimal to no anthropisation has occurred and non-human agents are the primary determinants of the system's dynamics and composition.
natural monument	http://purl.obolibrary.org/obo/ENVO_00000359	A natural environment which 1) may contain one or more geological formations or biological entities 2) has been designated by a competent authority as having outstanding or unique value because of its rarity, aesthetic qualities, or cultural significance.
neritic epipelagic zone biome	http://purl.obolibrary.org/obo/ENVO_01000042	The neritic epipelagic zone biome comprises the marine water column that occurs above a continental shelf and extends from the surface of the ocean to a depth of ca. 200-250m. Throughout the zone the light field tends to be asymmetrical vertically, so that the direction and elevation of the sun can still be detected. The epipelagic zone encompasses the euphotic zone and, where and when it occurs,…
neritic mesopelagic zone biome	http://purl.obolibrary.org/obo/ENVO_01000043	The neritic mesopelagic zone biome comprises the marine column that occurs above a continental shelf and extends from approximately 200 to 1000 m depth - the maximal depth of light penetration in all but the clearest oligotrophic ocean regions. In comparison to the epipelagic zone, dominant forms of pelagic organisms do not change very much; however, there are marked changes in species compositio…
neritic mussel bed	http://purl.obolibrary.org/obo/ENVO_01001389	A mussel bed which is located in benthic regions beyond (offshore to) the continental shelf.
neritic mussel reef	http://purl.obolibrary.org/obo/ENVO_01001380	A marine reef which is located on a shelf (i.e. in the neritic zone) and primarily composed of self-adhered or conglomerated mussel shells.
neritic pelagic zone biome	http://purl.obolibrary.org/obo/ENVO_01000032	The neritic epipelagic zone biome comprises the marine water column above a continental shelf.
neritic sea surface microlayer biome	http://purl.obolibrary.org/obo/ENVO_01000041	The neritic sea surface microlayer (SML) biome comprises the top 1000 micrometers of marine surface waters occurring above a continental shelf. It is the boundary layer where all exchange occurs between the atmosphere and the ocean. The chemical, physical, and biological properties of the SML differ greatly from the sub-surface water just a few centimeters beneath.
non-saline aerosol environment	http://purl.obolibrary.org/obo/ENVO_01001054	An environmental system which has its properties and dynamics determined by an aerosol with a low concentration of dissolved solutes.
non-saline planetary subsurface environment	http://purl.obolibrary.org/obo/ENVO_01001047	An environmental system which has its properties and dynamics determined by those parts of a planetary subsurface zone which are not saline.
non-saline sediment environment	http://purl.obolibrary.org/obo/ENVO_01001049	An environmental system which has its properties and dynamics determined by sediment permeated by non-saline water.
ocean biome	http://purl.obolibrary.org/obo/ENVO_01000048	The ocean biome comprises major bodies of saline water, principal components of the hydrosphere. Approximately 71% of the Earth's surface is covered by ocean, a continuous body of water that is customarily divided into several principal oceans and smaller seas. More than half of this area is over 3,000 metres (9,800 ft) deep. Average oceanic salinity is around 35 parts per thousand (ppt) (3.5%), …
oceanic abyssopelagic zone biome	http://purl.obolibrary.org/obo/ENVO_01000038	The abyssopelagic zone biome comprises the marine water column below the bathypelagic zone biome at approximately 2500 -2700 m and extends either to the hadal pelagic zone biome (at approximately 6000 m) or to the benthopelagic zone biome within ca. 100 m of the seafloor. The depth of 2700 m may be critical for physiological reasons as the change in hydrostatic pressure across this depth may prec…
oceanic bathypelagic zone biome	http://purl.obolibrary.org/obo/ENVO_01000037	The bathypelagic zone biome comprises the marine water column below approximately 1000 m water depth - the maximum depth to which detectable daylight penetrates in all but the clearest oligotrophic waters - and extends to about 2500 - 2700 m water depth. In the temperate Atlantic, the beginning of the bathypelagic zone biome approximates to the deep oxygen minimum and the base of the permanent th…
oceanic benthopelagic zone biome	http://purl.obolibrary.org/obo/ENVO_01000040	The benthopelagic zone biome comprises regions of the marine water column which usually coincide with the benthic boundary layer (BBL) - the layer of isothermal and isohaline water contiguous to the sea floor. A general reversal in the declining gradient of pelagic biomass may be observed here, perhaps explained by viable nutrition on the sea floor being resuspended by bottom currents. This zone …
oceanic epipelagic zone biome	http://purl.obolibrary.org/obo/ENVO_01000035	The oceanic epipelagic zone biome comprises regions of the marine water column that occur offshore, beyond a continental shelf. This biome extends from the surface of the ocean to a depth of ca. 200-250m. Throughout the zone the light field tends to be asymmetrical vertically, so that the direction and elevation of the sun can still be detected. The oceanic epipelagic zone biome encompasses the e…
oceanic hadal pelagic zone biome	http://purl.obolibrary.org/obo/ENVO_01000039	The oceanic hadal pelagic zone biome comprises the water column in oceanic trenches occurring at depths between 6000m and 10,000m.
oceanic mesopelagic zone biome	http://purl.obolibrary.org/obo/ENVO_01000036	The oceanic mesopelagic zone biome comprises regions of the marine water column that occur offshore, beyond a continental shelf. This biome extends through the water column from approximately 200-1000 m depth - the maximal depth of light penetration in all but the clearest oligotrophic ocean regions. In comparison to the epipelagic zone, dominant forms of pelagic organisms do not change very much…
oceanic mussel bed	http://purl.obolibrary.org/obo/ENVO_01001388	A mussel bed which is located in benthic regions beyond (offshore to) the continental shelf.
oceanic mussel reef	http://purl.obolibrary.org/obo/ENVO_01001381	A marine reef which is present in the depths beyond (offshore relative to) the continental shelf and primarily composed of self-adhered or conglomerated mussel shells.
oceanic pelagic zone biome	http://purl.obolibrary.org/obo/ENVO_01000033	The oceanic epipelagic zone biome comprises the marine water column offshore, beyond a continental shelf.
oceanic sea surface microlayer biome	http://purl.obolibrary.org/obo/ENVO_01000034	The oceanic sea surface microlayer (SML) biome comprises the top 1000 micrometers of the marine surface waters occurring offshore, away from a continental shelf. It is the boundary layer where all exchange occurs between the atmosphere and the ocean. The chemical, physical, and biological properties of the SML differ greatly from the sub-surface water just a few centimeters beneath.
Paramo	http://purl.obolibrary.org/obo/ENVO_01001360	An alpine tundra ecosystem which exists above the continuous timberline but below the permanent snowline on elevated land in tropical regions.
planetary subsurface environment	http://purl.obolibrary.org/obo/ENVO_01001046	An environmental system which has its properties and dynamics determined by the subsurface zone of a planet.
plant-associated environment	http://purl.obolibrary.org/obo/ENVO_01001001	An environmental system determined by a green plant.
planted forest	http://purl.obolibrary.org/obo/ENVO_00000119	A forest that has been intentionally established by human intervention.
pocasin	http://purl.obolibrary.org/obo/ENVO_00000239	A palustrine wetland with deep, acidic, sandy, peat soils. Groundwater saturates the soil except during brief seasonal dry spells and during prolonged droughts. Pocosin soils are nutrient deficient (oligotrophic), especially in phosphorus.
polar biome	http://purl.obolibrary.org/obo/ENVO_01000339	A biome which has the environmental condition polar
polar desert biome	http://purl.obolibrary.org/obo/ENVO_01000186	A polar desert biome is a desert biome which is subject to low levels of insolation, annual precipitation less than 250 millimeters, and a mean temperature less than 10 degrees Celsius during its warmest month. Temperature changes in polar deserts frequently cross the freezing point of water.
polar tree-line ecotone	http://purl.obolibrary.org/obo/ENVO_01000948	An ecotone which bridges a subpolar coniferous forest biome and a tundra biome.
primary forest	http://purl.obolibrary.org/obo/ENVO_01000768	Forest which originally covered a region before changes in the environment brought about by people. (Source: PHC)
rangeland biome	http://purl.obolibrary.org/obo/ENVO_01000247	A rangeland biome is an anthropogenic terrestrial biome which is primarily used for the rearing and grazing of livestock.
rhizosphere environment	http://purl.obolibrary.org/obo/ENVO_01000999	An environmental system determined by the presence of a plant rhizosphere.
saline aerosol environment	http://purl.obolibrary.org/obo/ENVO_01001053	An environmental system which has its properties and dynamics determined by a saline aerosol.
saline environment	http://purl.obolibrary.org/obo/ENVO_01001040	An environment which is determined by materials which bear significant concentrations of salts.
saline marsh	http://purl.obolibrary.org/obo/ENVO_00000054	A marsh whose water contains a considerable quantity of dissolved salts.
saline sediment environment	http://purl.obolibrary.org/obo/ENVO_01001050	An environmental system which has its properties and dynamics determined by sediment permeated by saline water.
saline water environment	http://purl.obolibrary.org/obo/ENVO_01000307	An environmental system which has its properties and dynamics determined by saline water.
savanna biome	http://purl.obolibrary.org/obo/ENVO_01000178	A savanna biome is a woodland biome which has seasonal water availability and includes, across its entire spatial extent, trees spaced sufficiently far apart to allow an unbroken layer of grass, sedge (Cyperaceae) or rush (Juncaceae) communities to live.
sea water environment	http://purl.obolibrary.org/obo/ENVO_01000321	An environmental system determined by seawater.
sediment environment	http://purl.obolibrary.org/obo/ENVO_01001048	An environmental system which has its properties and dynamics determined by sediment.
shrubland biome	http://purl.obolibrary.org/obo/ENVO_01000176	A shrubland biome is a terrestrial biome which includes, across its entire spatial extent, dense groups of shrubs.
skin environment	http://purl.obolibrary.org/obo/ENVO_2100003	An environment determined by an area or zone of skin tissue.
soil biocrust	http://purl.obolibrary.org/obo/ENVO_01000910	A biocrust which is formed by photosynthetic microbial assemblages colonising the surface layer of a portion of arid soil. Through their successional dynamics, these communities reduce the soil surface's albedo, impart it with stability against erosion, modify its hydrology, and promote its fertility.
soil environment	http://purl.obolibrary.org/obo/ENVO_01001044	An environmental system which has its properties and dynamics determined by soil.
sterile water environment	http://purl.obolibrary.org/obo/ENVO_01001042	An environmental system which has its properties and dynamics determined by sterile water.
strand swamp	http://purl.obolibrary.org/obo/ENVO_01000327	A strand swamp is a swamp that forms linear drainage channels on flatlands.
subpolar coniferous forest biome	http://purl.obolibrary.org/obo/ENVO_01000250	A coniferous forest biome which includes communities adapted to subpolar conditions.
subtropical broadleaf forest biome	http://purl.obolibrary.org/obo/ENVO_01000201	A broadleaf forest biome which is subject to subtropical climate patterns.
subtropical coniferous forest biome	http://purl.obolibrary.org/obo/ENVO_01000209	A coniferous forest biome which is subject to subtropical climate patterns.
subtropical desert biome	http://purl.obolibrary.org/obo/ENVO_01000184	A subtropical desert biome is a desert biome which has communities adapted to temperatures above a monthly average of 18 degrees Celsius, high daily temperature ranges of approximately 20 degrees Celsius, high insolation (but lower than that of a tropical desert biome), inhibited cloud formation, and very low precipitation. Subtropical desert biomes located near coasts with cold upwellings may ha…
subtropical grassland biome	http://purl.obolibrary.org/obo/ENVO_01000191	A grassland biome which is subject to subtropical climate patterns.
subtropical shrubland biome	http://purl.obolibrary.org/obo/ENVO_01000213	A shrubland biome which is subject to subtropical climate patterns.
subtropical woodland biome	http://purl.obolibrary.org/obo/ENVO_01000222	A woodland biome which is subject to subtropical climate patterns.
swamp ecosystem	http://purl.obolibrary.org/obo/ENVO_00000233	A wetland ecosystem in which land mass is permanently inundated by shallow bodies of water, generally with a substantial number of hummocks, or dry-land protrusions.
temperate broadleaf evergreen forest	http://purl.obolibrary.org/obo/ENVO_01000397	A broadleaf evergreen forest which is subject to temperate climate patterns.
temperate broadleaf forest biome	http://purl.obolibrary.org/obo/ENVO_01000202	A broadleaf forest which is subject to temperate climate patterns.
temperate coniferous forest biome	http://purl.obolibrary.org/obo/ENVO_01000211	A coniferous forest biome which is subject to temperate climate patterns.
temperate deciduous broadleaf forest	http://purl.obolibrary.org/obo/ENVO_01000385	A deciduous broadleaf forest which is subject to temperate climate patterns.
temperate deciduous needleleaf forest	http://purl.obolibrary.org/obo/ENVO_01000386	A deciduous needleleaf forest which is subject to temperate climate patterns.
temperate desert biome	http://purl.obolibrary.org/obo/ENVO_01000182	A temperate desert biome is a desert biome which has communities adapted to intermediate insolation, low rainfall, and large temperature variations between winter and summer. Winter temperatures may fall below 0 degrees Celsius. Some precipitation in this biome may fall as snow.
temperate evergreen needleleaf forest	http://purl.obolibrary.org/obo/ENVO_01000383	An evergreen needleleaf forest which is subject to temperate climate patterns.
temperate freshwater swamp forest	http://purl.obolibrary.org/obo/ENVO_01000398	A freshwater swamp forest which is subject to temperate climate patterns.
temperate marginal sea biome	http://purl.obolibrary.org/obo/ENVO_01000856	A marginal sea biome which is located in a region with a temperate climate.
temperate marine upwelling biome	http://purl.obolibrary.org/obo/ENVO_01000860	A marine upwelling biome which is located in a region subject to temperate climate patterns.
temperate mixed broadleaf forest	http://purl.obolibrary.org/obo/ENVO_01000389	A mixed broadleaf forest which is subject to temperate climate patterns.
temperate mixed forest biome	http://purl.obolibrary.org/obo/ENVO_01000212	A mixed forest biome which is subject to temperate climate patterns.
temperate mixed needleleaf forest	http://purl.obolibrary.org/obo/ENVO_01000390	A mixed needleleaf forest which is subject to temperate climate patterns.
temperate sclerophyllous dry forest	http://purl.obolibrary.org/obo/ENVO_01000395	A sclerophyllous forest which is subject to temperate climate patterns.
terrestrial biome	http://purl.obolibrary.org/obo/ENVO_00000446	A biome that applies to the terrestrial realm.
terrestrial natural environment	http://purl.obolibrary.org/obo/ENVO_01001226	A natural environment which is located on a land mass.
tidal mangrove shrubland	http://purl.obolibrary.org/obo/ENVO_01001369	A shrubland biome which is densely vegetated by dwarf or short mangroves (and associates) that are generally less than 6 meters in height, is tidally influenced, is located in tropical or subtropical areas.
tidal mudflat	http://purl.obolibrary.org/obo/ENVO_00000241	A level tract lying at a small depth below the surface of water, or alternately covered and left bare by the tide.
tree line ecotone	http://purl.obolibrary.org/obo/ENVO_01000953	An ecotone which overlaps at least one biome which supports the growth and persistence of trees and at least one that does not. Before ceasing altogether, tree growth becomes sparse and trees appear stunted as conditions become less favourable along this ecotone.
tropical broadleaf forest biome	http://purl.obolibrary.org/obo/ENVO_01000200	A broadleaf forest biome which is subject to tropical climate patterns.
tropical coniferous forest biome	http://purl.obolibrary.org/obo/ENVO_01000210	A coniferous forest biome which is subject to tropical climate patterns.
tropical deciduous broadleaf forest	http://purl.obolibrary.org/obo/ENVO_01000387	A deciduous broadleaf forest which is subject to tropical climate patterns.
tropical desert biome	http://purl.obolibrary.org/obo/ENVO_01000183	A tropical desert biome is a desert biome which has communities adapted to temperatures above a monthly average of 18 degrees Celsius, high daily temperature ranges of approximately 20 degrees Celsius, very high insolation due to inhibited cloud formation, and very low precipitation. Tropical desert biomes located near coasts with cold upwellings may have cooler temperatures and reduced insolutio…
tropical freshwater swamp forest	http://purl.obolibrary.org/obo/ENVO_01000394	A freshwater swamp forest which is subject to tropical climate patterns.
tropical lower montane forest	http://purl.obolibrary.org/obo/ENVO_01000393	A montane forest which is located in a region subject to tropical climate patterns modulated by sufficient elevation to encounter lower montane climatic patterns.
tropical lowland evergreen broadleaf rain forest	http://purl.obolibrary.org/obo/ENVO_01000384	A broadleaf forest which is subject to tropical climate patterns with high rainfall, is located in a lowland area, and is dominated by plants which retain their leaves throughout the year.
tropical marginal sea biome	http://purl.obolibrary.org/obo/ENVO_01001230	A marginal sea biome which is located in a region with a tropical climate.
tropical marine coral reef biome	http://purl.obolibrary.org/obo/ENVO_01000854	A marine coral reef biome which is located in a region with a tropical climate.
tropical marine semi-evergreen forest	http://purl.obolibrary.org/obo/ENVO_01000376	A semi-evergreen forest is a forest which undergoes a long dry season and, as a consequence, has a two-storey layer structure, a dry canopy, a leaf litter layer that only decays during moist periods trees with very small leaves or which shed their leaves to conserve water and which flower during the dry season and grow during the wet season.
tropical marine upwelling biome	http://purl.obolibrary.org/obo/ENVO_01000859	A marine upwelling biome which is subject to tropical climate patterns.
tropical mixed broadleaf forest	http://purl.obolibrary.org/obo/ENVO_01000402	A mixed broadleaf forest which is subject to tropical climate patterns.
tropical mixed needleleaf forest	http://purl.obolibrary.org/obo/ENVO_01000401	A mixed needleleaf forest which is subject to tropical climate patterns.
tropical needleleaf forest	http://purl.obolibrary.org/obo/ENVO_01000399	A needleleaf forest which is subject to tropical climate patterns.
tropical sclerophyllous dry forest	http://purl.obolibrary.org/obo/ENVO_01000396	A sclerophyllous forest which is subject to tropical climate patterns.
tropical semi-deciduous broadleaf forest	http://purl.obolibrary.org/obo/ENVO_01000388	A semi-deciduous broadleaf forest which is subject to tropical climate patterns.
tropical upper montane forest	http://purl.obolibrary.org/obo/ENVO_01000392	A montane forest which is located in a region subject to tropical climate patterns modulated by sufficient elevation to encounter upper montane climate patterns.
tundra biome	http://purl.obolibrary.org/obo/ENVO_01000180	A tundra is a terrestrial biome which includes, across its spatial extent, only low-growing vegetation such as dwarf shrubs, sedges and grasses, mosses, and lichens. Tundra biomes rarely have monthly average temperatures above 10 degrees Celsius and have low evapotranspiration ratios.
tundra ecosystem	http://purl.obolibrary.org/obo/ENVO_01001370	An ecosystem which 1) typically has monthly average temperatures below 10 degrees Celsius 2) has a low evapotranspiration ratio and 3) is determined by communities of low-growing vegetation such as dwarf shrubs, sedges and grasses, mosses, and lichens.
urban biome	http://purl.obolibrary.org/obo/ENVO_01000249	An urban biome is a dense settlement biome which has been urbanised.
village biome	http://purl.obolibrary.org/obo/ENVO_01000246	A village biome is an anthropogenic terrestrial biome which contains settlements such as villages, towns, and/or small cities and which is primarily used for agricultural activity.
wet meadow ecosystem	http://purl.obolibrary.org/obo/ENVO_01000449	A wet meadow is a type of wetland with soils that are saturated with water for part or all of the growing season.
wetland ecosystem	http://purl.obolibrary.org/obo/ENVO_01001209	A terrestrial ecosystem which is inundated or saturated by surface or ground water at a frequency and duration sufficient to support, and that under normal circumstances does support, a prevalence of vegetation typically adapted for life in saturated soil conditions.
woodland biome	http://purl.obolibrary.org/obo/ENVO_01000175	A woodland biome is a terrestrial biome which includes, across its entire spatial extent, woody plants spaced sufficiently far apart to allow light penetration to support communities of herbaceous plants or shrubs living closer to the woodland floor.
woodland ecosystem	http://purl.obolibrary.org/obo/ENVO_01001245	An ecosystem which is determined by communities of plants with a tree growth form and in which members of those communities are spaced sufficiently far apart to allow sunlight to illuminate the understory.
xeric basin biome	http://purl.obolibrary.org/obo/ENVO_00000893	A biome which has little permanent surface water and a low relative abundance of springs.

## Sheet: uberon-body-parts
label	IRI	definition
abdomen	http://purl.obolibrary.org/obo/UBERON_0000916	The subdivision of the vertebrate body between the thorax and pelvis. The ventral part of the abdomen contains the abdominal cavity and visceral organs. The dorsal part includes the abdominal section of the vertebral column.
abdominal segment of trunk	http://purl.obolibrary.org/obo/UBERON_0002417	The abdominal segment of the torso.
aboral subdivision of organism	http://purl.obolibrary.org/obo/UBERON_0008259	A major subdivision of an organism that is the entire side of the organism aboral to the plane that divides the organism in two, perpendicular to the oral-aboral axiom.
acropodium region	http://purl.obolibrary.org/obo/UBERON_0012354	The segment of the autopod that is distal to the metapodial region and consists of the digits.
adipose fin	http://purl.obolibrary.org/obo/UBERON_2000251	A fin that is fleshy, lacks supporting rays, and is located posterior to the dorsal fin.
adult abdomen	http://purl.obolibrary.org/obo/UBERON_6003023	Abdomen of the adult.
adult abdominal segment	http://purl.obolibrary.org/obo/UBERON_6003024	Any abdominal segment (UBERON:6000021) that is part of some adult abdomen (UBERON:6003023).
adult antennal segment	http://purl.obolibrary.org/obo/UBERON_6003012	Any antennal segment (UBERON:6000009) that is part of some adult head (UBERON:6003007).
adult head segment	http://purl.obolibrary.org/obo/UBERON_6003009	Segment of the adult head.
adult labral segment	http://purl.obolibrary.org/obo/UBERON_6003011	Any labral segment (UBERON:6000008) that is part of some adult head (UBERON:6003007).
adult mesothoracic segment	http://purl.obolibrary.org/obo/UBERON_6003021	Any mesothoracic segment (UBERON:6000018) that is part of some adult thorax (UBERON:6003018).
adult procephalic segment	http://purl.obolibrary.org/obo/UBERON_6003010	Any procephalic segment (UBERON:6000007) that is part of some adult head (UBERON:6003007).
adult prothoracic segment	http://purl.obolibrary.org/obo/UBERON_6003020	Any prothoracic segment (UBERON:6000017) that is part of some adult thorax (UBERON:6003018).
adult segment	http://purl.obolibrary.org/obo/UBERON_6003006	Segment of the adult.
adult tagma	http://purl.obolibrary.org/obo/UBERON_6003005	Any tagma (UBERON:6000002) that is part of some adult (UBERON:6003004).
adult thoracic segment	http://purl.obolibrary.org/obo/UBERON_6003019	Any segment (UBERON:6000003) that is part of some adult thorax (UBERON:6003018).
adult thorax	http://purl.obolibrary.org/obo/UBERON_6003018	Thorax of the adult.
alular digit	http://purl.obolibrary.org/obo/UBERON_0012260	A manual digit found in Aves that is the most preaxial position and is morphologically similar to digit 1 in the standard tetrapod configuration and develops from embryonic digit 2, with contributions from embryonic digit 1.
alular digit plus metapodial segment	http://purl.obolibrary.org/obo/UBERON_5012260	A subdivision of the autopod consisting of alular digit plus the region incorporating a single metapodial element. These segments are typically repeated along the pre-axiom to post-axial axis.
anal fin	http://purl.obolibrary.org/obo/UBERON_4000163	Median fin that is located posterior to the anus.
anal region	http://purl.obolibrary.org/obo/UBERON_0001353	The anus and surrounding regions. Encompasses both internal and external regions, where present
[truncated: 318 more rows]

## Sheet: uberon-life-stages
label	URI
2 cell stage	http://purl.obolibrary.org/obo/UBERON_0007232
[truncated: 42 more rows]
